---

## Characterisation and zoonotic risk of tick viruses in public datasets

Yuting Lin<sup>1,2</sup> and David J Pascall<sup>\*1</sup>

1. MRC Biostatistics Unit, University of Cambridge, Cambridge
2. Royal Veterinary College, University of London, London

\*Corresponding author: [david.pascall@mrc-bsu.cam.ac.uk](mailto:david.pascall@mrc-bsu.cam.ac.uk)

### Abstract

Tick-borne viruses remain a substantial zoonotic risk worldwide, so knowledge of the diversity of tick viruses has potential health consequences. Despite their importance, large amounts of sequences in public datasets from tick meta-genomic and –transcriptomic projects remain unannotated, sequence data that could contain undocumented viruses. Through data mining and bioinformatic analyses of more than 37,800 public meta-genomic and -transcriptomic datasets, we found 83 unannotated contigs exhibiting high identity with known tick viruses. These putative viral contigs were classified into three RNA viral families (*Alphatetraviridae*, *Orthomyxoviridae*, *Chuviridae*) and one DNA viral family (*Asfaviridae*). After manual checking of quality and dissimilarity toward other sequences in the dataset, these 83 contigs were reduced to five putative novel Alphatetra-like viral contigs, four putative novel Orthomyxo-like viral contigs, and one Chu-like viral contig which clustered with known tick-borne viruses, forming a separate clade within the viral families. We further attempted to assess which previously known tick viruses likely represent zoonotic risks and thus deserve further investigation. We ranked the human infection potential of 136 known tick-borne viruses using a genome composition-based machine learning model. We found five high-risk tick-borne viruses (Langat virus, Lonestar tick chuvirus 1, Grotenhout virus, Taggart virus, and Johnston Atoll virus) that have not been known to infect human and two viral families (*Nairoviridae* and *Phenuiviridae*) that contain a large proportion of potential zoonotic tick-borne viruses. This adds to the knowledge of tick virus diversity and highlights the importance of surveillance of newly emerging tick-borne diseases.

### Importance

Ticks are important hosts of pathogens. Despite this, numerous tick-borne viruses are still unknown or poorly characterised. To overcome this, we re-examined currently known tick-borne viruses and identified putative novel viruses associated with ticks in public datasets. Using genome-based machine learning approach, we predicted five high-risk tick-borne viruses that have not yet been reported to cause human infections. Additionally, we highlighted two viral families, *Nairoviridae* and *Phenuiviridae*, which are potential public health threats. Our analysis also revealed 10 putative novel RNA viral contigs clustered with known tick-borne viruses. Our study highlights the importance of monitoring ticks and the viruses they carry in endemic areas to prevent and control zoonotic infectious disease outbreaks. To achieve this, we advocate for a multidisciplinary approach within a One Health and EcoHealth framework that considers the relationship between zoonotic disease outbreaks and their hosts, humans, and the environment.

### Introduction

The role of ticks in the transmission of viruses has been known for over 100 years (1) with ticks being second only to mosquitoes as vectors of pathogens to humans and the primary vector of pathogens to livestock, wildlife, and companion animals (2). Nonetheless, new tick viruses are still being

---

detected (3). Two recent examples are Yezo virus identified in Japan (4) and Songling virus identified in China (5), which have both been associated with acute human febrile disease.

Prior to the advent of molecular biology, tick-borne viruses were identified through microscopy, isolation in culture or serology (6–11). Over the last two decades, meta-genomics and –transcriptomics tools have revolutionised virus discovery. These approaches employ high-throughput sequencing technologies to capture total viral communities in a relatively unbiased manner (12,13) and have facilitated studies of the tick virome that resulted in the discovery and characterisation of hundreds of new tick-borne viruses globally (14–23). While this has led to dramatic increases in the understanding of tick virus communities, being able to evaluate the human infection potential of the discovered viruses would additionally allow the leveraging of this data to provide public health benefits.

Models of zoonotic risk assessment often rely on the existence of zoonotic viruses in the same viral family or evolutionary relatedness to known zoonoses (24). These models rely on phenotypic information commonly unavailable for novel viruses or of insufficient resolution to estimate different levels of zoonotic potential for closely related viruses (25–27). More recent models based on the genomic features of viruses which do not strictly rely on phylogeny or taxonomy avoid this issue. Such models use genomic features that may individually contain weak signals but can be combined and exploited via machine learning algorithms (28–31). These models, built from genomic data alone, have particular strength in evaluating newly discovered viruses that lack other information sources, but are limited by the need for full viral genomes for accurate assessment.

In this study, we aimed to detect novel viruses that may have been overlooked by previous tick meta-genomic and –transcriptomic studies, and assess the zoonotic risk posed by tick virus diversity as it is currently understood. Thus, we searched publicly available tick sequence data for signs of viruses misidentified as tick sequences and evaluated the zoonotic risk of these and other tick viruses to find those which deserve further investigation.

## Materials and methods

**Datasets.** We collected tick virus data from reports published prior to December 2021 and constructed a tick virus dataset that contained 261 tick-borne viruses from 23 viral families (34 genera) and 12 putative tick-borne viruses sampled from tick pools. Tick-borne viruses with unknown tick vectors (N = 13) or sequences unavailable (N = 13) were excluded from analyses. This resulted in 235 viruses in the final tick virus database, of which 3 of them (*Amblyomma dissimile mivirus*, *Nuomin virus*, and *Granville quaranjavirus*) were added later and not included in the database for virus detection. Among the 235 tick-borne viruses, more than 92% of viruses were RNA viruses, while few other viral sequences were identified (2.2% DNA viruses and 5.6% viruses with unknown genome composition). Among the RNA viruses, most sequences were negative-sense (-) single-stranded RNA (ssRNA) viruses (63.0%), followed by positive-sense (+) single-stranded RNA (ssRNA) (20.8%), double-stranded RNA (dsRNA) (8.5%), and unclassified RNA (5.6%) viruses, depending on version 2020 of the International Committee on Taxonomy of Viruses (ICTV) master species list (<https://talk.ictvonline.org/files/master-species-lists/>). We labelled each virus as being capable of infecting humans or not known to infect humans using published reports as ground truth. In all cases, only viruses detected in humans by either PCR or sequencing were considered to have proven ability to infect humans. See the summary table of currently known tick-borne viruses in **Appendix Table 1**.

---

**Viral identification and annotation.** We used representative genomic sequences of the 232 tick-borne viruses as our reference database, with genome segments of segmented viruses concatenated into one. Using the 'blastn\_vdb' (corresponding to nucleotide BLAST) executable in the BLAST+ v2.13.0 (32–34), we searched the Sequence Read Archive (SRA), Transcriptome Shotgun Assembly (TSA), and Whole Genome Shotgun (WGS) datasets that derived from ticks and subordinate taxa directly with an expectation cut-off of 0.05. We also performed a 'tBLASTx' search for the TSA database to find distant relationships between nucleotide sequences; SRA and WGS datasets were not suitable for 'tBLASTx' search because it was computationally prohibitive. This resulted in 1328 TSA, 19,990 SRA, and 1861 WGS sequences after removing duplicates. The GenBank accession numbers of the candidate sequences are provided at <https://github.com/ytlin2021/TickVirus.git>.

Candidate sequences were filtered according to the pipeline modified from Webster et al. (35). The thresholds used in each step can be seen in **Figure 1**. To confirm final RNA candidates, we checked the presence of RNA-dependent RNA polymerase (RdRp), an essential protein encoded in the genomes of all replicating RNA viruses without a DNA stage except deltaviruses, and not present in the genome of the eukaryotic or prokaryotic cell. We adopted a combined analysis approach to predict RdRps by using a general protein function prediction software package InterProScan v5.55-88.0 (36) and a new open bioinformatics toolkit - RdRp-scan - that allowed the detection of divergent viral RdRp sequences (37). Candidate sequences less than 600 nucleotides (nt) in length were discarded. The translated candidate sequences were searched according to the RdRp-scan workflow (37) and were also predicted using the InterProScan search function. The conserved RdRp motifs were annotated manually based on the RdRp motif database in RdRp-scan, and final RNA viral candidates were confirmed. The workflow of detecting viral RdRp sequences and the thresholds used in each step can be seen in **Appendix Figure 1**.

Protein functions of putative novel viral contigs were annotated using InterProScan and 'BLASTx'. Open Reading Frames (ORFs) were predicted using ORF Finder tool in NCBI (38) with a 150 nt length cut-off. InterProScan searched for protein function annotations in its available databases, including the Gene Ontology (39,40) and Pfam (41,42) databases. At the same time, 'BLASTx' were used to search against the non-redundant protein database with an expectation cut-off of 1e-5 following Charon et al. (37).

**Phylogenetics.** We searched for close and distant relatives of the identified novel viral contigs in viruses (NCBI taxa ID: 10239) non-redundant nucleotide and protein databases by performing 'BLASTn' and 'BLASTx' separately with an expectation cut-off of 0.005. For each contig with BLAST hits, the phylogenetic hierarchy of the best hits (top 10 hits from 'BLASTx') was traversed upward to identify the lowest taxonomic classification displaying a 75% majority taxonomic agreement following Webster et al. (35). If the best hits were unclassified viruses, the upper order was identified, and the protein sequences were aligned in each family under the order to determine the classification. This allowed putative novel viral contigs in the study to be classified into three RNA viral families (*Alphatetraviridae*, *Orthomyxoviridae*, *Chuviridae*) and one DNA viral family (*Asfaviridae*). All virus species in the same family, as well as unassigned viruses, were aligned and used to construct phylogenetic trees.

Phylogeny of RNA viruses was inferred on the basis of RNA-dependent RNA polymerase protein sequences. We aligned viral RdRp protein sequences using the ClustalW algorithm (43) embedded in the GUIDANCE2 server v2.02 (44). GUIDANCE2 server removed any sequences with a score of less than 0.6 and columns with a score of less than 0.93, aiming to leave sufficient information in alignments while allowing large taxonomic groups of viruses to be compared.

---

We performed tree estimation for all trees in BEAST2, averaging over protein models using the OBAMA module (45,46). A lognormal relaxed clock model was applied (56-58), and a Yule tree prior was used (47,48). As convergence repeatedly failed under standard MCMC for the *Chuviridae* and *Orthomyxoviridae* trees, models were fit using BEAST2's Metropolis-coupled MCMC routines with 4 chains and a target cross-chain move acceptance probability of 0.029 for the *Alphatetraviridae* and *Chuviridae* trees, and a fixed heating parameter of 0.3 for the *Orthomyxoviridae* tree (49,50). The Yule process birth rate was given a vague Exponential prior with mean 1000, all other parameters took default prior values. Trees were run for 100,000,000 iterations with 50,000,000 discarded as burn-in, and the posterior then being thinned to 1000 trees. A second run of each tree was used to assess convergence with the R package RWTY (51).

**Zoonotic risk analyses.** The zoonotic risk (precisely, probability of human infection given biologically relevant exposure) for 136 tick-borne viruses with complete genome sequences were evaluated using the best performing model from Mollentze et al. (31), referred to here as genome composition-based (GCB), which was trained on a range of viral genome features and human similarity features. A representative genome was selected for each virus, giving preference to sequences from NCBI Reference Sequence Database (RefSeq) ([www.ncbi.nlm.nih.gov/refseq/](http://www.ncbi.nlm.nih.gov/refseq/)) wherever possible. RefSeq sequences that had annotation issues or were not judged to be representative of the naturally circulating virus were replaced with alternative genomes. Following Mollentze et al. (31), the predicted probabilities from the GCB model were used to categorise viruses into four priority categories based on the overlap of confidence intervals (CIs) the value of 0.293 (low: entire 95% CI of predicted probability  $\leq$  cut-off; medium: mean prediction  $\leq$  cut-off, but CI crosses it; high: mean prediction  $>$  cut-off, but CI crosses it; very high: entire CI  $>$  cut-off). Since the current GCB model was trained for viruses with complete sequences, 99 tick viruses with only partial genomes available were excluded from the analyses. To characterise the zoonotic potential of the identified novel viral contigs, we did qualitative analyses by evaluating the published complete genomes of known viruses most similar to these incomplete viral sequences as determined by a nucleotide BLAST against GenBank.

## Results

### Identification of putative novel viruses associated with ticks

We examined contigs that showed nucleotide similarity ( $<$  90% identity) to previously characterised tick virus sequences from an extensive collection of tick meta-genomic and –transcriptomic datasets (23,050 SRA, 3523 TSA, and 11,279 WGS sequences; collected on 3 March 2022). The pipeline of detecting novel tick-associated viral contigs can be found in **Figure 1**. For more information on the tick virus database and tick meta-genomic and –transcriptomic datasets, see Methods.

In total, we identified 83 putative novel viral contigs, including 53 double-stranded DNA viral contigs, 5 positive-sense and 25 negative-sense RNA viral contigs (**Appendix Table 2-4**). The 53 DNA viral contigs belong to the family *Asfaviridae*, with homology to African swine fever virus. These African swine fever virus-like contigs were found in *Ornithodoros porcinus* and *Ornithodoros moubata* ticks (**Appendix Table 4**), and all but two of these contigs derived from a study that had previously reported the integration of African swine fever like elements into the genomes of these soft tick species (52), so they will not be discussed further. The 5 positive-sense RNA viral contigs belong to the family *Alphatetraviridae*. Of the negative-sense RNA viral contigs, 5 belong to the family *Orthomyxoviridae*, and 20 belong to the family *Chuviridae*, including 19 chuviruses believed to be replication defective from tick SRA projects. After filtering duplicate sequences (GenBank IDs:

---

HACP01027211.1 and HACW01024387.1), we obtained 10 putative RNA viral contigs ranging from 728 bp to 5496 bp (**Table 1**). The putative novel viruses found in this study were named after their host order and related viral family, followed by a number (e.g., Alphetetra-like tick virus 1). All sequences identified in the present study with can be found on GenBank (see accession numbers in **Table 1** and **Appendix Table 2-4**).

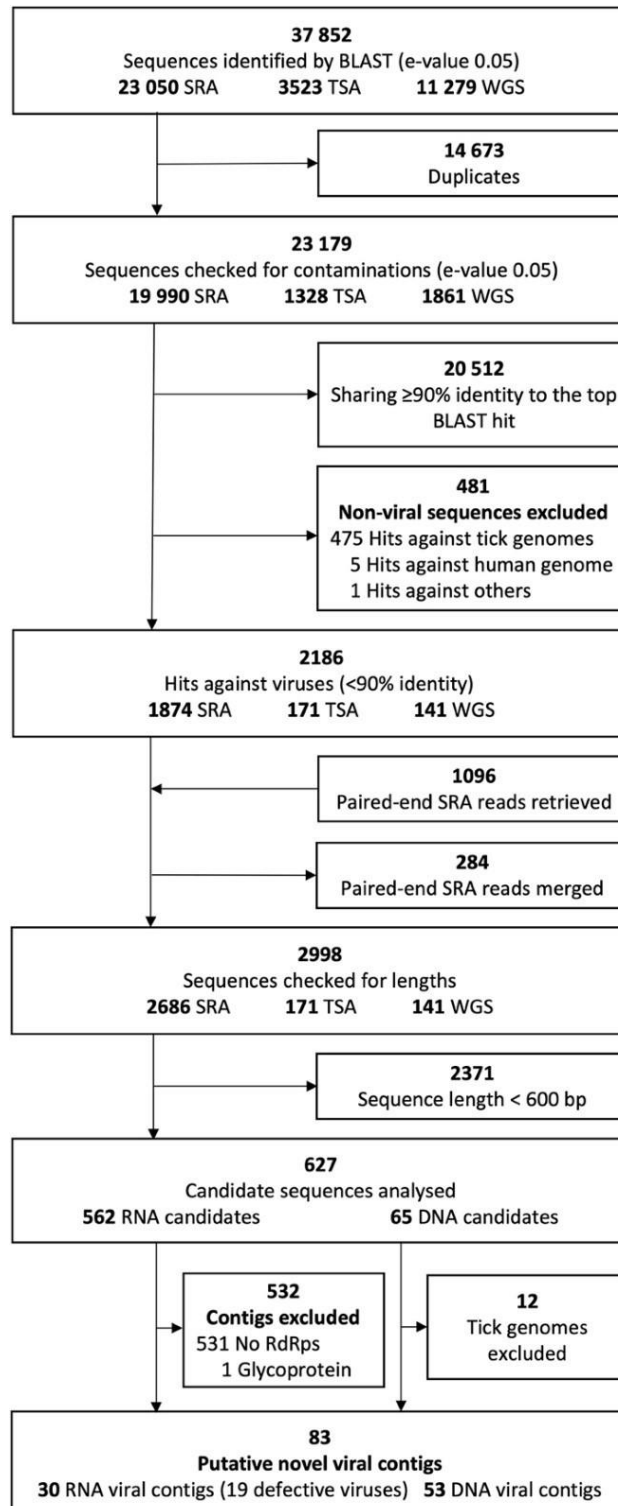

**Figure 1** The workflow of identification of novel tick-associated viral contigs. Through BLAST search and curation, 53 DNA sequences (identified as African swine fever like elements) and 30 RNA

sequences (putative viruses in the family *Alphatetraviridae*, *Orthomyxoviridae* and *Chuviridae*) from a collection of tick meta-genomic and –transcriptomic datasets (3 March 2022) were identified as putative novel viral contigs. 10 putative RNA viral contigs were further analysed after filtering. TSA = Transcriptome Shotgun Assembly, SRA = Sequence Read Archive, WGS = Whole Genome Shotgun, E-value = Expectation value.

**Table 1** The putative novel RNA viral contigs found after bioinformatic checking.

| Putative novel viral contig  | Tick species                          | Geographical location | Provisional family | Genome structure | Sequence length (nt) | Closest BLASTx match (% amino acid identity) | GenBank ID                         |
|------------------------------|---------------------------------------|-----------------------|--------------------|------------------|----------------------|----------------------------------------------|------------------------------------|
| Orthomyxo-like tick virus 1  | <i>Rhipicephalus sanguineus</i>       | Italy                 | Orthomyxoviridae   | ssRNA(-)         | 2136                 | Zambezi tick virus 1 (89)                    | HACP01027211.1<br>(HACW01024387.1) |
| Orthomyxo-like tick virus 2  | <i>Rhipicephalus sanguineus</i>       | Italy                 | Orthomyxoviridae   | ssRNA(-)         | 1290                 | Zambezi tick virus 1 (73)                    | HACP01022575.1                     |
| Orthomyxo-like tick virus 3  | <i>Rhipicephalus sanguineus</i>       | Italy                 | Orthomyxoviridae   | ssRNA(-)         | 1290                 | Zambezi tick virus 1 (88)                    | HACW01018819.1                     |
| Orthomyxo-like tick virus 4  | <i>Rhipicephalus haemaphysaloides</i> | China                 | Orthomyxoviridae   | ssRNA(-)         | 2357                 | Zambezi tick virus 1 (89)                    | GIJA01018702.1                     |
| Alphatetra-like tick virus 1 | <i>Ixodes ricinus</i>                 | China                 | Alphatetraviridae  | ssRNA(+)         | 5496                 | Bulatov virus (44)                           | GIXL01013119.1                     |
| Alphatetra-like tick virus 2 | <i>Ixodes persulcatus</i>             | USA                   | Alphatetraviridae  | ssRNA(+)         | 1056                 | Vovk virus (60)                              | GBXQ01012426.1                     |
| Alphatetra-like tick virus 3 | <i>Ornithodoros moubata</i>           | Spain                 | Alphatetraviridae  | ssRNA(+)         | 5452                 | Bulatov virus (40)                           | GIXP02005464.1                     |
| Alphatetra-like tick virus 4 | <i>Ornithodoros moubata</i>           | Spain                 | Alphatetraviridae  | ssRNA(+)         | 3873                 | Bulatov virus (41)                           | GFJQ02007921.1                     |
| Alphatetra-like tick virus 5 | <i>Rhipicephalus microplus</i>        | USA                   | Alphatetraviridae  | ssRNA(+)         | 1488                 | Hepelivirales sp. (80)                       | GEMR01004364.1                     |
| Chu-like tick virus 1        | <i>Ixodes scapularis</i>              | USA                   | Chuviridae         | ssRNA(-)         | 728                  | Nuomin virus (89)                            | GGIX01201876.1                     |

### (i) Orthomyxoviridae-like contigs

The contigs we found contained homologs of Influenza RdRp subunit PB1, the most conserved of the orthomyxovirus genes (**Appendix Figure 2**). Phylogenetic analysis revealed that the putative novel Orthomyxo-like viral contigs fell into the genus *Quaranjavirus* and formed a separate clade with other tick-borne quaranjaviruses (**Appendix Figure 3; Table 1**). Within PB1, the contigs were phylogenetically closely related to Zambezi tick virus 1 (ZaTV-1) – a highly divergent virus identified in *Rhipicephalus* ticks from Mozambique (53) and shared approximately 77% amino-acids identity (**Appendix Figure 3; Table 1**). Quaranjaviruses are enveloped negative-sense single-stranded segmented RNA viruses, generally with multiple segments (54) which have been recorded in argasid and ixodid ticks, other arachnids, insects and vertebrates (55,56). In the present study, we identified 4 putative novel Orthomyxo-like tick viruses from ixodid tick metagenomic projects, 3 of which derived from sequence sampled from *Rhipicephalus sanguineus* in Italy, and one from *Rhipicephalus haemaphysaloides* in China (**Table 1**).

We note that four of the six the viral species that have complete genomes in this clade were either predicted to have very high ( $N = 1$ ) or high ( $N = 3$ ) zoonotic potential based on the GCB model (**Table 2**; the GenBank ID can be found in **Appendix Table 5**), with Quarantil virus (QRFV), one of the viruses rated to have high zoonotic potential, being confirmed to lead to infections in humans (54). Taken together, these results suggest that the novel Orthomyxo-like viral contigs identified in the current study may represent a potential risk of human infection given exposure (which is possible, as *R. haemaphysaloides* is known to parasitise humans).

### (ii) Alphetetraviridae-like contigs

Members of the *Alphetetraviridae* are non-enveloped positive-sense single-stranded RNA viruses (57). The identified Alphetetra-like contigs ranged from 1488 nt to 5496 nt, detected via the presence of a putative RdRp 2 motif; some of the longer sequences also encoded putative nucleoside triphosphate hydrolase, viral RNA helicase, and viral methyltransferase three motifs (**Figure 2B**). Viruses in the family *Alphetetraviridae* had been previously believed to infect predominantly moths and butterflies (57), but the recent discovery of several Alphetetra-like viruses in ticks (23,58) implies that this may have been due to sampling biases. Consistent with this, we found the presence of potential Alphetetra-like viruses in four ixodid tick species (*Ixodes ricinus*, *Ixodes persulcatus*, *Ornithodoros moubata* and *Rhipicephalus microplus*) sampled in three geographically diverse locations (China, Spain, and USA) (**Table 1**). Phylogenetic analysis suggested that the novel Alphetetra-like tick viruses formed a separate clade, being placed with the tick-borne viruses recently identified in ixodid ticks from Antarctica (Vovk virus and Bulatov virus from the seabird tick, *Ixodes uriae*) (58) and China (Hubei tick hepe-like virus found in *R. microplus* and *Haemaphysalis longicornis*) (23), and Heilongjiang sediment betatetravirus of unknown host, but originally sampled from river sediment in China (59) (**Figure 3B**; **Table 1**).

No members of the *Alphetetraviridae* are known to infect humans, and, unfortunately, only partial genomes were available for the previously identified viruses in the proposed new clade (Bulatov virus, Vovk virus and Heilongjiang sediment betatetravirus), thus they were inappropriate for zoonotic risk analysis based on the GCB model. The closest related viruses with full genomes were all isolated from moths. Of these viruses *Nudaurelia capensis* beta virus was predicted to have high zoonotic potential; *Dendrolimus punctatus* virus and *Helicoverpa armigera* stunt virus were predicted to have medium zoonotic potential (**Table 2**; the GenBank IDs can be found in **Appendix Table 5**). This result illustrates a deficiency of the currently available zoonotic risk assessment tools for viruses discovered through meta-genomic or –transcriptomic methods. Zoonotic risk estimation using genome information generally requires complete viral genomes, but viruses found through these methods are often incomplete or exhibit uncertainty in segment linkage for segmented viruses, which impacts the ability to make fast decisions on virus research and surveillance at the earliest stage of virus discovery. Training existing models on features from partial viral genomes provides a potential avenue for future work to help alleviate this issue.

### (iii) Chuviridae-like contigs

We identified 20 Chu-like viral contigs from *Ixodes scapularis* and *Hyalomma asiaticum* sampled in the US and China (**Table 1**; **Appendix Table 3**). Members of the *Chuviridae* are negative-sense single-stranded RNA viruses, which display a wide variety of genome organisations, including unsegmented, bi-segmented, and circular forms (15). Only the contig labelled Chu-like tick virus 1 is consistent with a live virus, as all other contigs showed signs of mutational degradation with many stop codons present in the region with homology to the RdRp. All but one of the contigs exhibiting

---

evidence of degradation were generated from a laboratory population of *Hy. asiaticum*, maintained under controlled conditions (60). As such, we speculate that they likely result from the presence of an integrated Chu-like virus in the *Hy. asiaticum* genome present in this laboratory population, and, likely, more broadly.

The viral sequence of Chu-like tick virus 1 was 728 nt in length, comprising one putative ORF that encodes a 240-amino acid protein containing the potential RdRp domain, nucleoside triphosphate hydrolase, viral RNA helicase, and viral methyltransferase 3 (**Figure 2C**). Chu-like tick virus 1 was clustered with other miviruses and was phylogenetically closely related to Suffolk virus, originally sampled in USA (20), with approximately 87% nucleotide identity (**Figure C; Table 1**). With regards to the human infection potential of Chu-like tick virus 1, it is notable that it showed a RdRp amino-acid identity of around 90% with Nuomin virus which has recently been associated with human febrile illness in China (61). The prediction results also classified Suffolk virus into the high zoonotic potential category (**Table 2**; the GenBank IDs can be found in **Appendix Table 5**). These results suggest that Chu-like tick virus 1 may pose a zoonotic risk. This may be especially relevant as the sequence was detected in *I. scapularis*, an important vector of other human pathogens, and so the potential for human exposure is high. However, given the small number of known species in the family *Chuviridae* when the GCB model was trained (31), caution must be applied, as the model might not be able to accurately predict the zoonotic potential viruses in this family. There would therefore seem to be a definite need for characterising viruses in the family *Chuviridae* in terms of their viability in human cell lines with these results feeding through to future zoonotic modelling efforts.

**Table 2** Zoonotic risks of virus species closely related to the putative novel Alphetetra-like viral contigs. Zoonotic risks of sequences in GenBank format were predicted using the GCB model.

| Putative novel viral contigs  | Relative viral species                  | Current status            | Predicted probability | 95% Confidence interval | Zoonotic potential |
|-------------------------------|-----------------------------------------|---------------------------|-----------------------|-------------------------|--------------------|
| Orthomyxo-like viral contigs  | <i>Wellfleet Bay virus</i>              | No known human infections | 0.368                 | 0.213-0.636             | High               |
|                               | <i>Araguari virus</i>                   | No known human infections | 0.222                 | 0.102-0.372             | Medium             |
|                               | <i>Johnston Atoll quaranjavirus</i>     | No known human infections | 0.513                 | 0.311-0.802             | Very high          |
|                               | <i>Lake Chad virus</i>                  | No known human infections | 0.184                 | 0.081-0.334             | Medium             |
|                               | <i>Tjuloc virus</i>                     | No known human infections | 0.352                 | 0.141-0.607             | High               |
|                               | <i>Quaranfil quaranjavirus</i>          | Human virus (54)          | 0.561                 | 0.128-0.863             | High               |
| Alphetetra-like viral contigs | <i>Nudaurelia capensis beta virus</i>   | No known human infections | 0.302                 | 0.153-0.497             | High               |
|                               | <i>Dendrolimus punctatus virus</i>      | No known human infections | 0.234                 | 0.128-0.352             | Medium             |
|                               | <i>Helicoverpa armigera stunt virus</i> | No known human infections | 0.243                 | 0.135-0.387             | Medium             |
| Chu-like viral contigs        | <i>Mivirus suffolkense</i>              | No known human infections | 0.309                 | 0.151-0.562             | High               |



### A – Orthomyxo-like viral contigs

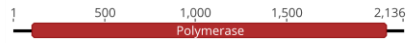

Orthomyxo-like tick virus 1

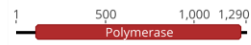

Orthomyxo-like tick virus 2

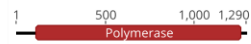

Orthomyxo-like tick virus 3

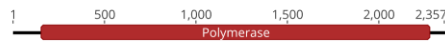

Orthomyxo-like tick virus 4

### B – Alphatetra-like viral contigs

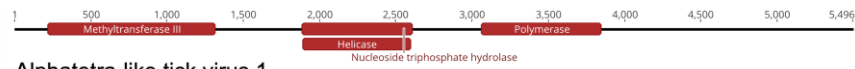

Alphatetra-like tick virus 1

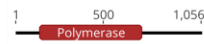

Alphatetra-like tick virus 2

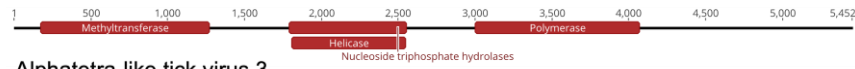

Alphatetra-like tick virus 3

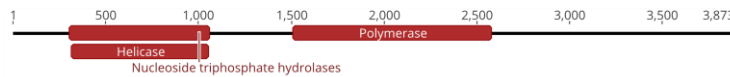

Alphatetra-like tick virus 4

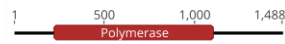

Alphatetra-like tick virus 5

### C – Chu-like viral contigs

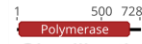

Chu-like tick virus 1

**Figure 2** Genome structures of novel viral contigs.

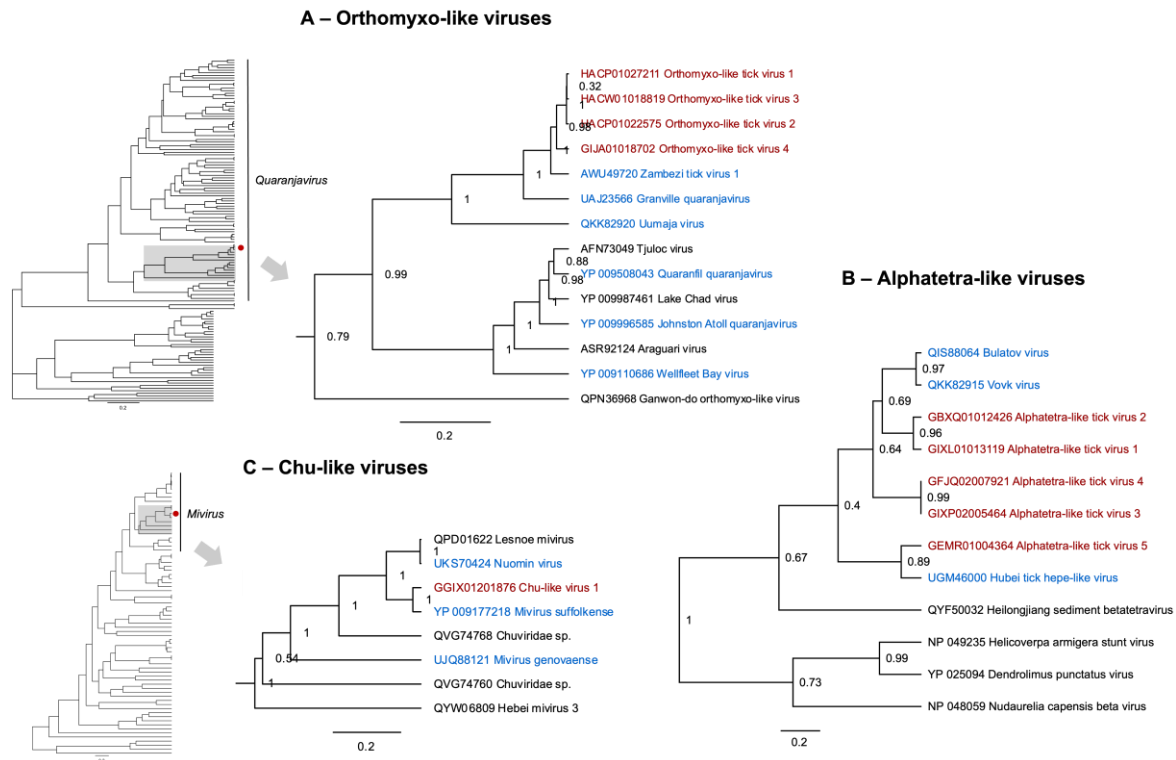

**Figure 3** Phylogenetic relationship of the novel viral contigs. Maximum clade credibility trees were inferred from the Bayesian posterior sample. Posterior clade probabilities are shown at the nodes, and the scale is given in amino-acid substitutions per site. Putative novel viral contigs found in the present study are shown in red, and previously known tick-borne viruses are shown in blue. GenBank ID can be found at **Appendix Figure 2-4**. Alignments using ClustalW and maximum clade credibility trees are provided in at <https://github.com/ytlin2021/TickVirus.git>.

### Zoonotic ranking of known tick-borne viruses

We used the prediction framework illustrated by Mollentze and colleagues (31) to rank 136 known tick-borne viruses with complete genomes. The viruses here were ranked based on predicted mean probability of zoonotic potential and further converted into four zoonotic potential categories, describing the overlap of confidence intervals (CIs) with the 0.293 cut-off (see Methods). The zoonotic prediction results were given in **Appendix Table 6**. This subset dataset contained representatives from 13 viral families (29 genera) and unassigned viruses, including 21 viruses that were known to infect humans by our criteria.

In total, 5.1% of tick-borne viruses were identified as having very high zoonotic potential (N = 7), 39.7% having high zoonotic potential (N = 54), 44.1% having medium zoonotic potential (N = 60) and 11.0% having low zoonotic potential (N = 15; **Appendix Figure 4**). Among the 22 currently known human-infecting tick-borne viruses, 81.8% were correctly identified as having either very high (N = 2) or high zoonotic potential (N = 16), and the remaining human-associated viruses were classified as medium zoonotic potential (N = 4; **Appendix Figure 4**). Among the tick-borne viruses with unknown human infectivity that were sequenced from nonhuman animal or tick samples, 37.7% were predicted to have either very high (N = 5) or high zoonotic potential (N = 38; **Appendix Figure 4**), including viruses in the family *Chuviridae*, *Nyamiviridae* and *Parvoviridae* that currently do not contain tick-borne viruses known to infect humans. Langat virus, Lonestar tick chuvirus 1, Grotenhout virus, Taggart virus, and Johnston Atoll virus were predicted to have very high zoonotic

risk, although they were not known to infect humans (**Figure 4B**). We therefore recommend these viruses be a high priority for further virological research, in order to assess whether greater surveillance of them in wild tick populations would be warranted.

We noted that the high and very high zoonotic potential categories were dominated by *Nairoviridae* (31.0%) and *Phenuiviridae* (28.6%), consistent with the recent findings of emerging human-infecting tick viruses in these two viral families. For example, among members of the *Nairoviridae* family, two emerging orthonairoviruses called Songling virus and Yezo virus have been recently detected in *Hyalomma* spp. ticks and isolated in patients with the acute febrile disease (4,5). Hospitals in Inner Mongolia and Heilongjiang province, China also reported infections from a novel nairovirus named Beiji nairovirus which mainly circulates in the ixodid ticks *I. crenulatus* and *I. persulcatus* (62). Similarly, among the *Phenuiviridae*, a novel phlebovirus named Tacheng tick virus 2 (TcTV-2) was first sampled from *D. marginatus* ticks in China (15) and later identified in various countries and tick species, primarily circulating in *D. marginatus* and *H. marginatum* ticks (63–65). The risk for human infection from TcTV-2 was not known until 2021 when Dong and colleagues reported on TcTV-2 infection in a patient in China (66). As recently emerged viruses, the geographic ranges of these viruses are poorly understood, and only partial genomes are available. The wide distribution of these tick species suggests that the geographic limits of the emerging tick-borne viruses in the family *Nairoviridae* and *Phenuiviridae* may be larger than presently assumed.

---

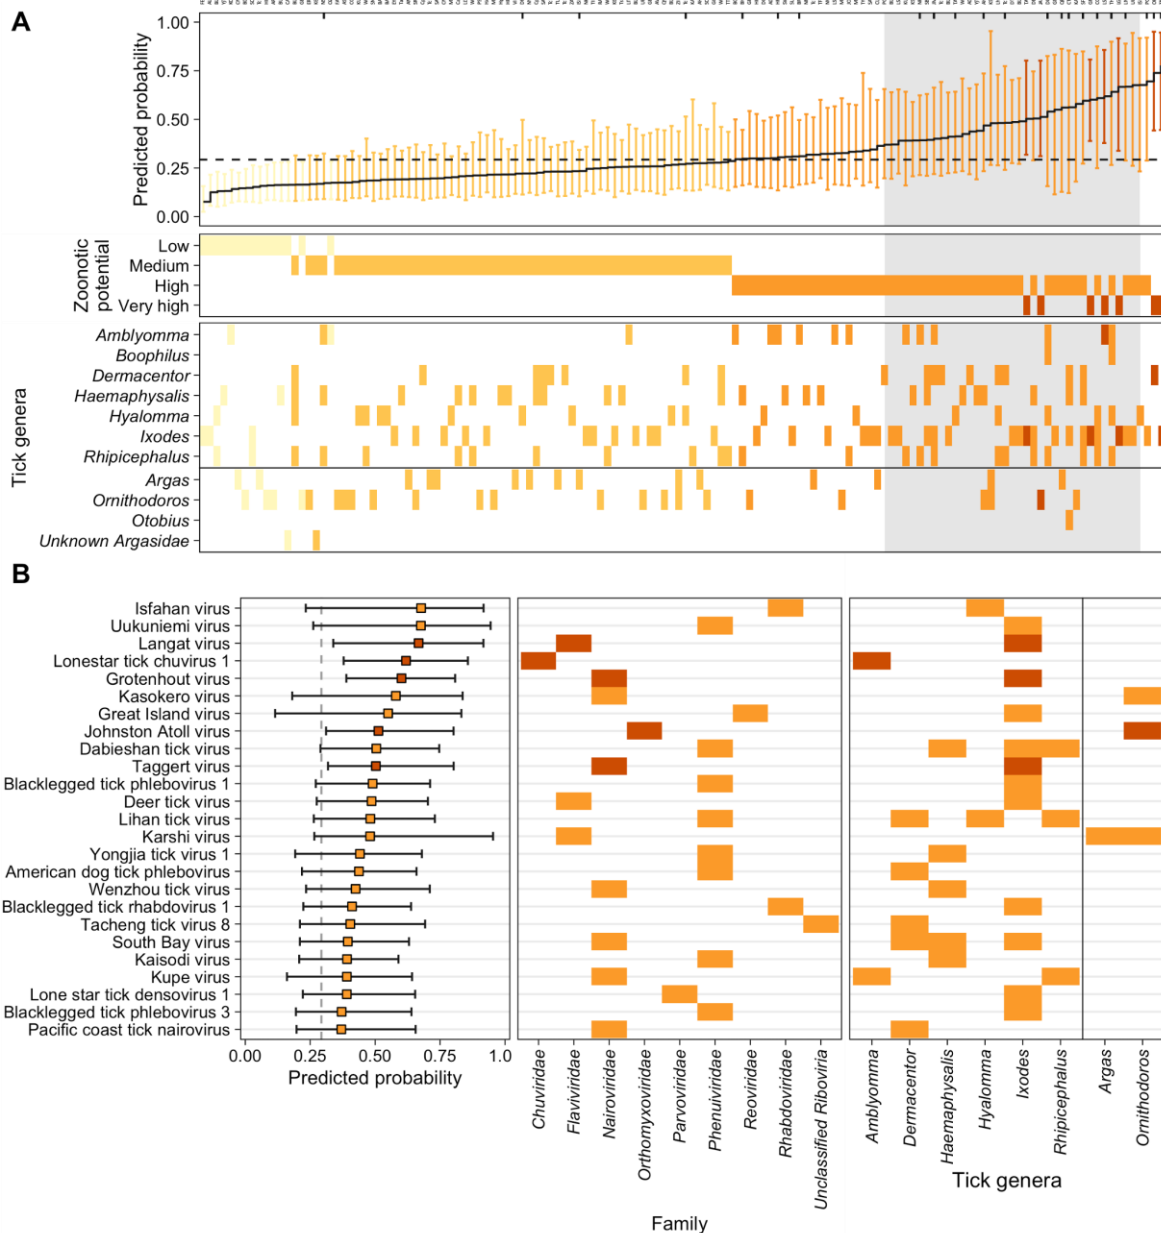

**Figure 4** Predicted probability of human infection for tick viruses based on genome composition-based model. **(A)** Predicted probability of human infection for 136 tick viruses with complete genomes. Colour scale show the assigned zoonotic potential categories. Tick marks along the top edge of the first panel show the location of viruses known to infect humans, while a dashed line shows the cut-off 0.293 that balanced sensitivity and specificity according to Mollentze et al. (31). The top 25 viruses that have no known human infection (contained within the grey box) are illustrated in more detail in **(B)** Viruses that have no known human infection are shown in red. Points show the mean calibrated score, with lines indicating 95% confidence intervals. Figures were drawn in R v4.1.1. Zoonotic ranking results can be found in **Appendix Table 6**. Numeric data underlying this figure can be found at <https://github.com/ytlin2021/TickVirus.git>.

## Discussion

Here we reanalysed existing tick metagenomic and meta-transcriptomic studies in public datasets to identify potential novel tick-borne viruses, using a tick virus database containing all known tick-borne viruses with genetic sequence available. We then employed the genome composition-based machine learning model of Mollentze et al. (31) to evaluate the zoonotic risk of all published tick viruses with complete genomes.

### **Novel virus discovery**

The presence of undetected viruses in pre-existing meta-genomic and –transcriptomic data illustrate a valuable underutilised data source. A combination of factors, ranging from studies being focused on specific taxa, limitations of the bioinformatic tools being used and incompleteness of reference datasets used within these tools, result the generation of large amounts of unannotated or incorrectly annotated sequence. This provides an opportunity for small studies such as this one, or much larger studies considering wider ranges of or more extensively studied taxa (e.g. (16,35,67)), reanalysing this historical data to detect new viruses (or, equally, other organisms of interest). As a pedagogical aside, as the resource requirements for these studies are low, the scope of the projects limited, the outputs of general scientific interest, and the skills required of particular value to employers, these studies make excellent short projects for late-stage undergraduate or early-stage postgraduate students on ecology or ecology-adjacent courses.

As with all studies that base viral detection around similarity to known viruses, our ability to detect novel viruses was limited by our reference dataset. Hence, some putative novel tick-borne viruses may have been missed due to the absence of similar viruses for comparison.

### **Zoonotic risk assessment**

The model applied showed promising results in distinguishing the zoonotic potential of closely related viruses within a genus. For instance, *Mivirus boleense* (15) was ranked as low zoonotic potential, while *Mivirus suffolkense* (20) was deemed high zoonotic potential. Given the validation of the methodology previously performed, this adds to the evidence suggesting the use of such models in providing targets for further research in a quick and low-cost way. However, caution must be exercised when interpreting the results of the genome composition-based model, as demonstrated in Figure 4B. The predicted probability interval was often large, leading to low confidence in the actual zoonotic risk of these viruses, and some viruses' zoonotic risks were inaccurately estimated. For example, Issyk-kul virus had low predicted probability and associated "medium" risk, although it has been indicated as a likely human pathogen (68). Moreover, the model training did not include any virus in the recently described viral family *Chuviridae*, reminding that while these tools are powerful, predictions of zoonotic risks from viral families with limited data should be treated with an abundance of caution and greater weight should be given to other clinical or epidemiological sources of evidence. Despite these limitations, good performance was observed in the family *Nairoviridae*, which included only 13 viruses in the dataset with the model predicting high risks of zoonotic potential for viruses with the group, consistent with recent findings of new and emerging tick-borne viral diseases associated with nairoviruses and orthonairoviruses (4,5,62,69).

A significant proportion of tick-borne viruses with high or very high zoonotic potential were sampled from ixodid ticks, which may reflect sampling bias towards viruses infecting hard ticks (family *Ixodidae*) in previous studies or be true representation of differences in intrinsic zoonotic risk between the viral communities of argasid and ixodid ticks. The ecology of argasid and ixodid ticks are different, with ixodid ticks generally having longer blood meals (70). The longer feeding time of ixodid ticks may make them on average more favourable for viral transmission, and thus more likely

---

to harbour communities of viruses capable of infecting mammals. However, it also means that ixodid ticks are more likely to be detected on a host, and thus more likely to be associated with resulting viral infections (i.e. a virus that might cause a fever of unknown origin if transmitted by an argasid tick may be able to be explicitly linked to a tick bite given the greater detection probability if transmitted by an ixodid tick). A more systematic approach that samples both hard and soft ticks would increase our knowledge of the diversity of tick-borne viruses carried by each type and allow us to assess whether they truly do differ in human infection risk.

As the model was trained on complete genomes (31), it is inappropriate for the use on viruses for which only partial genomes are available. This is a particularly important limitation for viruses found purely through bioinformatic means, where only single contigs or disconnected viral segments may be available. We attempted to assess the zoonotic risk of the putative novel viruses detected in this study by using the genomes of the closest related virus with a complete genome as a proxy. However, while this was unavoidable in this case, it does fall prey to one of the same biases the use of genome-based composition methods was originally intended to avoid, the assumption that zoonotic risk is conserved across the phylogeny. Hence, the zoonotic risks of these viruses ought to be reassessed should full genomes become available.

## Conclusion

Despite ticks being important vectors of pathogens, the human infection risks of most tick-borne viruses remain uncertain (71). In this study we have both identified new tick viruses in previously collected data and assessed the zoonotic potential of known tick virus diversity, identifying certain high risk viral families deserving of further study and, potentially, surveillance. Cataloging viruses and assessing their human infection risk, as we have done here, represents only a first step in the risk management of zoonoses. Further research into the ecological processes that underlie the geographical distribution and interspecific transmission of ticks and their viruses is necessary to gain a comprehensive understanding of the ecology of this system. It is this eventual ecological knowledge that may allow us to formulate more effective strategies for managing human exposure to vectors, preventing zoonoses at the source.

## Data accessibility statement

All novel viral sequences identified in this study have been submitted to Third Party Annotation Section of the DDBJ/ENA/GenBank databases under the accession numbers TPA: BK062905-BK062914. These sequence records will be held confidential until the data or accession numbers appear in print. Data and scripts used to generate the analyses are provided in at <https://github.com/ytlin2021/TickVirus.git>.

## Competing interests statement

The authors have no conflict of interest to declare.

## Author Contributions

Yuting Lin: Project administration (lead); methodology (equal); data curation (lead); investigation (lead); formal analysis (equal); visualisation (lead); writing – original draft (lead); writing – review and editing (equal). David J Pascall: Conceptualization (lead); methodology (equal); formal analysis

---

(equal); resources (lead); funding acquisition (lead); supervision (lead); writing – review and editing (equal).

## Acknowledgements

We thank members of the Medical Research Council (MRC) Biostatistics Unit at the University of Cambridge (MRC BSU) for scientific input. We are grateful for the technical support of core facilities the Cambridge University High Performance Computing Service.

DJP is funded by UKRI (UK Research & Innovation) through the JUNIPER consortium (MR/V038613/1), and through the MRC Biostatistics Unit core award from the MRC (MC UU 00002/11).

## References

1. Stockman S. 1918. Louping-ill. *J Comp Pathol Ther* 31:137–193.
  2. Mansfield KL, Jizhou L, Phipps LP, Johnson N. 2017. Emerging tick-borne viruses in the twenty-first century. *Front Cell Infect Microbiol* 7:298.
  3. Liu Z, Li L, Xu W, Yuan Y, Liang X, Zhang L, Wei Z, Sui L, Zhao Y, Cui Y, Yin Q, Li D, Li Q, Hou Z, Wei F, Liu Q, Wang Z. 2022. Extensive diversity of RNA viruses in ticks revealed by metagenomics in northeastern China. *PLoS Negl Trop Dis* 21;16(12):e0011017.
  4. Kodama F, Yamaguchi H, Park E, Tatemoto K, Sashika M, Nakao R, Terauchi Y, Mizuma K, Orba Y, Kariwa H, Hagiwara K, Okazaki K, Goto A, Komagome R, Miyoshi M, Ito T, Yamano K, Yoshii K, Funaki C, Ishizuka M, Shigeno A, Itakura Y, Bell-Sakyi L, Edagawa S, Nagasaka A, Sadoka Y, Sawa H, Maeda K, Saijo M, Matsuno K. 2021. A novel nairovirus associated with acute febrile illness in Hokkaido, Japan. *Nat Commun* 12(1):5539.
  5. Ma J, Lv XL, Zhang X, Han SZ, Wang ZD, Li L, Sun HT, Ma LX, Cheng ZL, Shoa JW, Chen C, Zhao YH, Sui L, Liu LN, Qian J, Wang W, Liu Q. 2021. Identification of a new orthonairovirus associated with human febrile illness in China. *Nat Med* 27(3):434–439.
  6. Cowdry EV. 1925. A group of microorganisms transmitted hereditarily in ticks and apparently unassociated with disease. *J Exp Med* 41(6):817–830.
  7. Burgdorfer W, Barbour AG, Hayes SF, Benach JL, Grunwaldt E, Davis JP. 1982. Lyme disease—a tick-borne spirochetosis? *Science* 216(4552):1317–1319.
  8. Benach JL, Bosler EM, Hanrahan JP, Coleman JL, Habicht GS, Bast TF, Cameron DJ, Ziegler JL, Barbour AG, Burgdorfer W, Edelman R, Kaslow RA. 1983. Spirochetes isolated from the blood of two patients with Lyme disease. *N Engl J Med*. 308(13):740–742.
  9. La Scola B, Raoult D. 1997. Laboratory diagnosis of rickettsioses: current approaches to diagnosis of old and new rickettsial diseases. *J Clin Microbiol* 35(11):2715–2727.
  10. Raoult D, Roux V. 1997. Rickettsioses as paradigms of new or emerging infectious diseases. *Clin Microbiol Rev* 10(4):694–719.
  11. Mans BJ, Pienaar R, Latif AA. 2015. A review of *Theileria* diagnostics and epidemiology. *Int J Parasitol Parasites Wildl* 4(1):104–118.
  12. Mokili JL, Rohwer F, Dutilh BE. 2012. Metagenomics and future perspectives in virus discovery. *Curr Opin Virol* 2(1):63–77.
  13. Tokarz R, Lipkin WI. 2021. Discovery and surveillance of tick-borne pathogens. *J Med Entomol* 58(4):1525–1535.
-

14. Garrison AR, Alkhovsky SV, Avšič-Županc T, Bente DA, Bergeron É, Burt F, Di Paola N, Ergünay K, Hewson R, Kuhn JH, Mirazimi A, Papa A, Sall AA, Spengler JR, Palacios G, ICTV Report Consortium. 2020. ICTV Virus Taxonomy Profile: *Nairoviridae*. J Gen Virol 101(8):798–799.
  15. Li CX, Shi M, Tian JH, Lin XD, Kang YJ, Chen LJ, Qin XC, Xu J, Holmes EC, Zhang YZ. 2015. Unprecedented genomic diversity of RNA viruses in arthropods reveals the ancestry of negative-sense RNA viruses. eLife 4:e05378.
  16. Shi M, Lin XD, Tian JH, Chen LJ, Chen X, Li CX, Qin XC, Li J, Cao JP, Eden JS, Buchmann J, Wang W, Xu J, Holmes EC, Zhang YZ. 2016. Redefining the invertebrate RNA virosphere. Nature 540(7634):539–543.
  17. Bouquet J, Melgar M, Swei A, Delwart E, Lane RS, Chiu CY. 2017. Metagenomic-based surveillance of pacific coast tick *Dermacentor occidentalis* identifies two novel bunyaviruses and an emerging human rickettsial pathogen. Sci Rep 7(1):12234.
  18. Pettersson JHO, Shi M, Bohlin J, Eldholm V, Brynildsrud OB, Paulsen KM, Andreassen, Holmes EC. 2017. Characterizing the virome of *Ixodes ricinus* ticks from northern Europe. Sci Rep 7(1):10870.
  19. Harvey E, Rose K, Eden JS, Lo N, Abeyasuriya T, Shi M, Doggett SL, Holmes EC. 2019. Extensive diversity of RNA viruses in Australian ticks. J Virol 93(3):e01358-18.
  20. Tokarz R, Sameroff S, Tagliafierro T, Jain K, Williams SH, Cucura DM, Rochlin I, Monson J, Carpi G, Tufts D, Diuk-Wasser M, Brinkerhoff J, Lipkin WI. 2018. Identification of novel viruses in *Amblyomma americanum*, *Dermacentor variabilis*, and *Ixodes scapularis* ticks. mSphere 3(2):e00614-17.
  21. Chandra S, Harvey E, Emery D, Holmes EC, Šlapeta J. 2021. Unbiased characterization of the microbiome and virome of questing ticks. Front Microbiol 12;12:627327.
  22. Shi J, Shen S, Wu H, Zhang Y, Deng F. 2021. Metagenomic profiling of viruses associated with *Rhipicephalus microplus* ticks in Yunnan Province, China. Virol Sin 36(4):623–635.
  23. Xu L, Guo M, Hu B, Zhou H, Yang W, Hui L, Huang R, Zhan J, Shi W, Wu Y. 2021. Tick virome diversity in Hubei Province, China, and the influence of host ecology. Virus Evol 7(2):veab089.
  24. Bergner LM, Mollentze N, Orton RJ, Tello C, Broos A, Biek R, Streicker DG. 2021. Characterizing and evaluating the zoonotic potential of novel viruses discovered in vampire bats. Viruses 13(2):252.
  25. Olival KJ, Hosseini PR, Zambrana-Torrel C, Ross N, Bogich TL, Daszak P. 2017. Host and viral traits predict zoonotic spillover from mammals. Nature 546(7660):646–650.
  26. Pulliam JRC, Dushoff J. 2009. Ability to replicate in the cytoplasm predicts zoonotic transmission of livestock viruses. J Infect Dis 199(4):565–568.
  27. Grange ZL, Goldstein T, Johnson CK, Anthony S, Gilardi K, Daszak P, Olival KJ, O’Rourke T, Murray S, Olson SH, Togami E, Vidal G, Expert Panel, the PREDICT Consortium, Mazet JAK. 2021. Ranking the risk of animal-to-human spillover for newly discovered viruses. Proc Natl Acad Sci 118(15):e2002324118.
  28. Bartoszewicz JM, Seidel A, Renard BY. 2021. Interpretable detection of novel human viruses from genome sequencing data. NAR Genomics Bioinforma 3(1):lqab004.
  29. Babayan SA, Orton RJ, Streicker DG. 2018. Predicting reservoir hosts and arthropod vectors from evolutionary signatures in RNA virus genomes. Science 362(6414):577–580.
  30. Zhang Z, Cai Z, Tan Z, Lu C, Jiang T, Zhang G, Peng Y. 2019. Rapid identification of human-infecting viruses. Transbound Emerg Dis 66(6):2517–2522.
  31. Mollentze N, Babayan SA, Streicker DG. 2021. Identifying and prioritizing potential human-infecting viruses from their genome sequences. PLOS Biol 19(9):e3001390.
-



32. Camacho C, Coulouris G, Avagyan V, Ma N, Papadopoulos J, Bealer K, Madden TL. 2009. BLAST+: architecture and applications. *BMC Bioinformatics* 10(1):421.
  33. Altschul SF, Gish W, Miller W, Myers EW, Lipman DJ. 1990. Basic local alignment search tool. *J Mol Biol* 215(3):403–10.
  34. Altschul SF, Madden TL, Schäffer AA, Zhang J, Zhang Z, Miller W, Lipman DJ. 1997. Gapped BLAST and PSI-BLAST: a new generation of protein database search programs. *Nucleic Acids Res* 25(17):3389–402.
  35. Webster CL, Waldron FM, Robertson S, Crowson D, Ferrari G, Quintana JF, Brouqui JM, Bayne EH, Longdon B, Buck AH, Lazzaro BP, Akorli J, Haddrill PR, Obbard DJ. 2015. The discovery, distribution, and evolution of viruses associated with *Drosophila melanogaster*. *PLoS Biol* 13(7):e1002210.
  36. Jones P, Binns D, Chang HY, Fraser M, Li W, McAnulla C, McWilliam H, Maslen J, Mitchell A, Nuka G, Pesseat S, Quinn AF, Sangrador-Vegas A, Scheremetjew M, Yong SY, Lopez R, Hunter S. 2014. InterProScan 5: genome-scale protein function classification. *Bioinformatics* 30(9):1236–1240.
  37. Charon J, Buchmann JP, Sadiq S, Holmes EC. 2022. RdRp-scan: A bioinformatic resource to identify and annotate divergent RNA viruses in metagenomic sequence data. *Virus Evol* 8(2):veac082.
  38. Wheeler DL, Barrett T, Benson DA, Bryant SH, Canese K, Chetvernin V, Church DM, DiCuccio M, Edgar R, Federhen S, Feolo M, Geer LY, Helmberg W, Kapustin Y, Khovayko O, Landsman D, Lipman DJ, Madden TL, Maglott DR, Miller V, Ostell J, Pruitt KD, Schuler GD, Shumway M, Sequeira E, Sherry ST, Sirotkin K, Souvorov A, Starchenko G, Tatusov RL, Tatusova TA, Wagner L, Yaschenko E. 2008. Database resources of the National Center for Biotechnology Information. *Nucleic Acids Res* 36:D13–21.
  39. Ashburner M, Ball CA, Blake JA, Botstein D, Butler H, Cherry JM, Davis AP, Dolinski K, Dwight SS, Eppig JT, Harris MA, Hill DP, Issel-Tarver L, Kasarskis A, Lewis S, Matese JC, Richardson JE, Ringwald M, Rubin GM, Sherlock G. 2000. Gene ontology: tool for the unification of biology. *Nat Genet* 25(1):25–30.
  40. Hennig S, Groth D, Lehrach H. 2003. Automated Gene Ontology annotation for anonymous sequence data. *Nucleic Acids Res* 31(13):3712–5.
  41. Punta M, Coghill PC, Eberhardt RY, Mistry J, Tate J, Boursnell C, Pang N, Forslund K, Ceric G, Clements J, Heger A, Holm L, Sonnhammer ELL, Eddy SR, Bateman A, Finn RD. 2012. The Pfam protein families database. *Nucleic Acids Res* 40:D290–301.
  42. Mistry J, Chuguransky S, Williams L, Qureshi M, Salazar GA, Sonnhammer ELL, SCE Tosatto, L Paladin, S Raj, LJ Richardson, RD Finn, A Bateman. 2021. Pfam: The protein families database in 2021. *Nucleic Acids Res* 49:D412–9.
  43. Thompson JD, Higgins DG, Gibson TJ. 1994. CLUSTAL W: improving the sensitivity of progressive multiple sequence alignment through sequence weighting, position-specific gap penalties and weight matrix choice. *Nucleic Acids Res* 22(22):4673–4680.
  44. Sela I, Ashkenazy H, Katoh K, Pupko T. 2015. GUIDANCE2: accurate detection of unreliable alignment regions accounting for the uncertainty of multiple parameters. *Nucleic Acids Res* 43(W1):W7–14.
  45. Bouckaert RR, Vaughan TG, Barido-Sottani J, Duchêne S, Fourment M, Gavryushkina A, Heled J, Jones G, Kühnert D, De Maio N, Matschiner M, Mendes FK, Müller NF, Ogilvie HA, du Plessis L, Poppinga A, Rambaut A, Rasmussen D, Siveroni I, Suchard MA, Wu CH, Xie D, Zhang C, Stadler T, Drummond AJ. 2019. BEAST 2.5: An advanced software platform for Bayesian evolutionary analysis. *PLoS Comput Biol* 15(4):e1006650.
-

46. Bouckaert RR. 2020. OBAMA: OBAMA for Bayesian amino-acid model averaging. PeerJ 8:e9460
  47. Yule GV. 1924. A mathematical theory of evolution, based on the conclusions of Dr J. C. Willis, P.R.S. Phil Trans R Soc B 213:21-87.
  48. Edwards AWF. 1970. Estimation of branch points of a branching diffusion process. J Roy Stat Soc B 32:155-174.
  49. Altekar G, Dwarkadas S, Huelsenbeck J, Ronquist F. 2004. Parallel Metropolis coupled Markov chain Monte Carlo for Bayesian phylogenetic inference. Bioinformatics 20(3):407-415.
  50. Müller NF, Bouckaert RR. 2020. Adaptive Metropolis-coupled MCMC for BEAST 2. PeerJ 8:e9473.
  51. Warren D, Geneva A, Lanfear R. 2017. RWTY (R We There Yet): An R package for examining convergence of Bayesian phylogenetic analyses. Mol Biol Evol 34(4):1016-1020.
  52. Forth JH, Forth LF, Lycett S, Bell-Sakyi L, Keil GM, Blome S, Calvigac-Spencer S, Wissgott A, Krause J, Höper D, Kampen H, Beer M. 2020. Identification of African swine fever virus-like elements in the soft tick genome provides insights into the virus' evolution. BMC Bio 18(1):136.
  53. Cholleti H, Hayer J, Mulandane FC, Falk K, Fafetine J, Berg M, Blomström AL. 2018. Viral metagenomics reveals the presence of highly divergent quaranjavirus in *Rhipicephalus* ticks from Mozambique. Infect Ecol Epidemiol 8(1):1478585.
  54. Mourya DT, Yadav PD, Nyayanit DA, Majumdar TD, Jain S, Sarkale P, Shete A. 2019. Characterization of a strain of quaranfil virus isolated from soft ticks in India. Is quaranfil virus an unrecognized cause of disease in humans and animals? Heliyon 5(3):e01368.
  55. Bratuleanu BE, Temmam S, Munier S, Chrétien D, Bigot T, van der Werf S, Savuta G, Eloit M. 2022. Detection of Phenuiviridae, Chuviridae members, and a novel quaranjavirus in hard ticks from Danube Delta. Front Vet Sci 9:863814.
  56. Allison AB, Ballard JR, Tesh RB, Brown JD, Ruder MG, Keel MK, Munk BA, Mickley RM, Gibbs SE, Travassos da Rosa AP, Ellis JC, Ip HS, Shearn-Bochsler VI, Rogers MB, Ghedin E, Holmes EC, Parrish CR, Dwyer C. 2015. Cyclic avian mass mortality in the northeastern United States is associated with a novel orthomyxovirus. J Virol 89(2):1389-403.
  57. Alphetraviridae, ViralZone. [cited 2022 Jul 9]. Available from: [https://viralzone.expasy.org/129?outline=all by species](https://viralzone.expasy.org/129?outline=all%20by%20species).
  58. Wille M, Harvey E, Shi M, Gonzalez-Acuña D, Holmes EC, Hurt AC. 2020. Sustained RNA virome diversity in Antarctic penguins and their ticks. ISME J 14(7):1768–82.
  59. Chen YM, Sadiq S, Tian JH, Chen X, Lin XD, Shen JJ, Chen H, Hoa ZY, Wille M, Zhou ZC, Wu J, Wang HW, Yang WD, Xu QY, Wang W, Goa WH, Holmes EC, Zhang YZ. 2022. RNA viromes from terrestrial sites across China expand environmental viral diversity. Nat Microbio 7:1312-1323.
  60. Yuan C, Wu J, Peng Y, Li Y, Shen S, Deng F, Hu Z, Zhou J, Wang M, Zou Z. 2020. Transcriptome analysis of the innate immune system of *Hyalomma asiaticum*. J Invert Path 177:107481.
  61. Quan L, Wang ZD, Gao Y, Lv X, Han S, Zhang X, Shao JW, Chen C, Li L, Hou SJ, Sui L, Zhao Y, Wang B, Wang W, Song M. 2020. Identification of a new chuvirus associated with febrile illness in China. Research Square <https://doi.org/10.21203/rs.3.rs-104938/v1> [preprint]
  62. Wang YC, Wei Z, Lv X, Han S, Wang Z, Fan C, Zhang X, Shao J, Zhao YH, Sui L, Chen C, Liao M, Wang B, Jin N, Li C, Ma J, Hou ZJ, Yang Z, Han Z, Zhang Y, Niu J, Wang W, Wang Y, Liu Q. 2021. A new nairo-like virus associated with human febrile illness in China. Emerg Microbes Infect 10(1):1200–1208.
-

63. Brinkmann A, Dinçer E, Polat C, Hekimoğlu O, Hacıoğlu S, Földes K, Özkul A, Öktem IMA, Nitsche A, Ergünay K. 2018. A metagenomic survey identifies Tamdy orthonairovirus as well as divergent phlebo-, rhabdo-, chu- and flavi-like viruses in Anatolia, Turkey. *Ticks Tick-Borne Dis* 9(5):1173–1183.
  64. Temmam S, Chrétien D, Bigot T, Dufour E, Petres S, Desquesnes M, Devillers E, Dumarest M, Yousfi L, Jittapalapong S, Karnchanabanthoeng A, Chaisiri K, Gagnieur L, Cosson JF, Vayssier-Taussat M, Morand S, Moutailler S, Eloit M. 2019. Monitoring silent spillovers before emergence: A pilot study at the tick/human interface in Thailand. *Front Microbiol* 10;2315.
  65. Bratuleanu BE, Temmam S, Chrétien D, Regnault B, Pérot P, Bouchier C, Bigot T, Savuța G, Eloit M. 2022. The virome of *Rhipicephalus*, *Dermacentor* and *Haemaphysalis* ticks from Eastern Romania includes novel viruses with potential relevance for public health. *Transbound Emerg Dis* 69(3):1387-1403.
  66. Dong Z, Yang M, Wang Z, Zhao S, Xie S, Yang Y, Lui G, Zhao S, Xie J, Liu Q, Wang Y. 2021. Human Tacheng tick virus 2 infection, China, 2019. *Emerg Infect Dis* 27(2):594–8.
  67. Käfer S, Paraskevopoulou S, Zirkel F, Wieseke N, Donath A, Petersen M, Jones TC, Liu S, Zhou X, Middendorf M, unglen S, Misof B, C Drosten. 2019. Re-assessing the diversity of negative strand RNA viruses in insects. *PLoS Pathog* 15(12):e1008224.
  68. L'vov DK, Kostjukov MA, Daniyarov OA, Tukhtaev TM, Sherikov BK. 1984. [Outbreak of arbovirus infection in the Tadzhik SSR due to the Issyk-Kul virus (Issyk-Kul fever)]. *Vopr Virusol* 29(1):89–92.
  69. Moming A, Shen S, Fang Y, Zhang J, Zhang Y, Tang S, Li T, Hu Z, Wang H, Zhang Y, Sun S, Wang LF, F Deng. 2021. Evidence of Human Exposure to Tamdy Virus, Northwest China. *Emerg Infect Dis* 27(12):3166–70.
  70. Lawrie CH, Uzcátegui NY, Gould EA, Nuttall PA. 2004. Ixodid and Argasid Tick Species and West Nile Virus. *Emerg Infect Dis* 10(4):653-657.
  71. Shi J, Hu Z, Deng F, Shen S. 2018. Tick-borne viruses. *Virol Sin* 33(1):21–43.
-

## Appendices

**Appendix Table 1.** Summary of currently known tick-borne viruses by December 2021. Information from a wide variety of sources, references in the table.

| Virus                       | Species                               | Genus                   | Family               | Genome structure | Accession                                   | Availability    | Human infection        | First description              | Tick vectors                                                                                | Distribution                                                                                                                         |
|-----------------------------|---------------------------------------|-------------------------|----------------------|------------------|---------------------------------------------|-----------------|------------------------|--------------------------------|---------------------------------------------------------------------------------------------|--------------------------------------------------------------------------------------------------------------------------------------|
| African swine fever virus   | <i>African swine fever virus</i>      | <i>Asfivirus</i>        | <i>Asfarviridae</i>  | dsDNA            | NC_04942                                    | Complete genome | ?                      | 1921 (Montgomery et al., 1921) | <i>O. erraticus</i> , <i>O. moubata</i> (Shi et al., 2018)                                  | Sub-Saharan Africa, South America, Southern Europe (Shi et al., 2018)                                                                |
| Canine circovirus           | <i>Canine circovirus</i>              | <i>Circovirus</i>       | <i>Circoviridae</i>  | ssDNA A (+/-)    | NC_020904                                   | Complete genome | ?                      | 2012 (Kapoor et al., 2012)     | <i>Haemaphysalis spp.</i> , <i>Rhipicephalus spp.</i> (Kapoor et al., 2012)                 | Australia, Brazil, China, Columbia, Croatia, Germany, Iran, Italy, Norway, Thailand, Turkey, UK, USA, Viet Nam (Urbani et al., 2021) |
| Avian-like circovirus       | <i>Tick associated circovirus 1</i>   | <i>Circovirus</i>       | <i>Circoviridae</i>  | ssDNA A (+/-)    | NC_030199                                   | Complete genome | ?                      | 2018 (Tokarz et al., 2018)     | <i>I. scapularis</i> (Tokarz et al., 2018)                                                  | USA (Tokarz et al., 2018)                                                                                                            |
| Nayun torquevirus           | Unclassified                          | <i>Thetatorquevirus</i> | <i>Anelloviridae</i> | ssDNA A (+/-)    | KP141758                                    | Partial genome  | ?                      | 2015 (Xia et al., 2015)        | <i>Rhipicephalus spp.</i> (Xia et al., 2015)                                                | China (Xia et al., 2015)                                                                                                             |
| Lone star tick densovirus 1 | Unclassified                          | Unclassified            | <i>Parvoviridae</i>  | ssDNA A (+/-)    | KX774632                                    | Complete genome | ?                      | 2018 (Tokarz et al., 2018)     | <i>I. scapularis</i> (Tokarz et al., 2018)                                                  | USA (Tokarz et al., 2018)                                                                                                            |
| Colorado tick fever virus   | <i>Colorado tick fever coltivirus</i> | <i>Coltivirus</i>       | <i>Reoviridae</i>    | dsRNA A          | NC_004191, NC_004181, NC_004182, NC_004183, | Complete genome | Yes (Shi et al., 2018) | 1946 (Florio et al., 1946)     | <i>D. andersoni</i> , <i>D. albipictus</i> , <i>D. arumapertus</i> , <i>D. occidentalis</i> | USA (Shi et al., 2018)                                                                                                               |

|              |                          |                   |                   |        |             |           |   |                 |                                         |                                    |
|--------------|--------------------------|-------------------|-------------------|--------|-------------|-----------|---|-----------------|-----------------------------------------|------------------------------------|
|              |                          |                   |                   |        | NC_00       |           |   |                 | s, H.                                   |                                    |
|              |                          |                   |                   |        | 4184,       |           |   |                 | <i>leporispalu</i>                      |                                    |
|              |                          |                   |                   |        | NC_00       |           |   |                 | <i>stris</i> , I.                       |                                    |
|              |                          |                   |                   |        | 4185,       |           |   |                 | <i>sculptus</i> , I.                    |                                    |
|              |                          |                   |                   |        | NC_00       |           |   |                 | <i>spinipalpis</i> ,                    |                                    |
|              |                          |                   |                   |        | 4186,       |           |   |                 | <i>Ot.</i>                              |                                    |
|              |                          |                   |                   |        | NC_00       |           |   |                 | <i>lagophilus</i>                       |                                    |
|              |                          |                   |                   |        | 4187,       |           |   |                 | (Shi et al.,                            |                                    |
|              |                          |                   |                   |        | NC_00       |           |   |                 | 2018)                                   |                                    |
|              |                          |                   |                   |        | 4188,       |           |   |                 |                                         |                                    |
|              |                          |                   |                   |        | NC_00       |           |   |                 |                                         |                                    |
|              |                          |                   |                   |        | 4180,       |           |   |                 |                                         |                                    |
|              |                          |                   |                   |        | NC_00       |           |   |                 |                                         |                                    |
|              |                          |                   |                   |        | 4189,       |           |   |                 |                                         |                                    |
|              |                          |                   |                   |        | NC_00       |           |   |                 |                                         |                                    |
|              |                          |                   |                   |        | 4190        |           |   |                 |                                         |                                    |
| Eyach virus  | <i>Eyach coltivirus</i>  | <i>Coltivirus</i> | <i>Reoviridae</i> | dsRN A | NC_00 3696, | Com plete | ? | 1976 (Rehse     | <i>I. ricinus</i> , <i>I. ventalloi</i> | France, Germany (Shi et al., 2018) |
|              |                          |                   |                   |        | NC_00 3697, | geno me   |   | - Kuppe         | (Shi et al., 2018)                      | (Shi et al., 2018)                 |
|              |                          |                   |                   |        | NC_00 3698, |           |   | r et al., 1976) |                                         |                                    |
|              |                          |                   |                   |        | NC_00 3699, |           |   |                 |                                         |                                    |
|              |                          |                   |                   |        | NC_00 3700, |           |   |                 |                                         |                                    |
|              |                          |                   |                   |        | NC_00 3701, |           |   |                 |                                         |                                    |
|              |                          |                   |                   |        | NC_00 3702, |           |   |                 |                                         |                                    |
|              |                          |                   |                   |        | NC_00 3703, |           |   |                 |                                         |                                    |
|              |                          |                   |                   |        | NC_00 3704, |           |   |                 |                                         |                                    |
|              |                          |                   |                   |        | NC_00 3705, |           |   |                 |                                         |                                    |
|              |                          |                   |                   |        | NC_00 3706, |           |   |                 |                                         |                                    |
|              |                          |                   |                   |        | NC_00 3707  |           |   |                 |                                         |                                    |
| Kundal virus | <i>Kundal coltivirus</i> | <i>Coltivirus</i> | <i>Reoviridae</i> | dsRN A | NC_05 5248, | Com plete | ? | 2019 (Yadav     | <i>Hy. antolicum</i>                    | India (Yadav et al., 2019)         |
|              |                          |                   |                   |        | NC_05 5249, | geno me   |   | et al., 2019)   | (Yadav et al., 2019)                    |                                    |
|              |                          |                   |                   |        | NC_05 5247, |           |   |                 |                                         |                                    |

---



---

|            |                   |                   |                   |      |       |       |   |         |                 |               |
|------------|-------------------|-------------------|-------------------|------|-------|-------|---|---------|-----------------|---------------|
|            |                   |                   |                   |      | NC_05 |       |   |         |                 |               |
|            |                   |                   |                   |      | 5240, |       |   |         |                 |               |
|            |                   |                   |                   |      | NC_05 |       |   |         |                 |               |
|            |                   |                   |                   |      | 5250, |       |   |         |                 |               |
|            |                   |                   |                   |      | NC_05 |       |   |         |                 |               |
|            |                   |                   |                   |      | 5239, |       |   |         |                 |               |
|            |                   |                   |                   |      | NC_05 |       |   |         |                 |               |
|            |                   |                   |                   |      | 5242, |       |   |         |                 |               |
|            |                   |                   |                   |      | NC_05 |       |   |         |                 |               |
|            |                   |                   |                   |      | 5245, |       |   |         |                 |               |
|            |                   |                   |                   |      | NC_05 |       |   |         |                 |               |
|            |                   |                   |                   |      | 5241, |       |   |         |                 |               |
|            |                   |                   |                   |      | NC_05 |       |   |         |                 |               |
|            |                   |                   |                   |      | 5246, |       |   |         |                 |               |
|            |                   |                   |                   |      | NC_05 |       |   |         |                 |               |
|            |                   |                   |                   |      | 5243, |       |   |         |                 |               |
|            |                   |                   |                   |      | NC_05 |       |   |         |                 |               |
|            |                   |                   |                   |      | 5244  |       |   |         |                 |               |
| Tarumizu   | <i>Tarumizu</i>   | <i>Coltivirus</i> | <i>Reoviridae</i> | dsRN | NC_05 | Com   | ? | 2017    | <i>H. flava</i> | Japan (Fujita |
| tick virus | <i>coltivirus</i> |                   |                   | A    | 5255, | plete |   | (Fujita | (Fujita et      | et al., 2017) |
|            |                   |                   |                   |      | NC_05 | geno  |   | et al., | al., 2017)      |               |
|            |                   |                   |                   |      | 5254, | me    |   | 2017)   |                 |               |
|            |                   |                   |                   |      | NC_05 |       |   |         |                 |               |
|            |                   |                   |                   |      | 5261, |       |   |         |                 |               |
|            |                   |                   |                   |      | NC_05 |       |   |         |                 |               |
|            |                   |                   |                   |      | 5259, |       |   |         |                 |               |
|            |                   |                   |                   |      | NC_05 |       |   |         |                 |               |
|            |                   |                   |                   |      | 5262, |       |   |         |                 |               |
|            |                   |                   |                   |      | NC_05 |       |   |         |                 |               |
|            |                   |                   |                   |      | 5251, |       |   |         |                 |               |
|            |                   |                   |                   |      | NC_05 |       |   |         |                 |               |
|            |                   |                   |                   |      | 5260, |       |   |         |                 |               |
|            |                   |                   |                   |      | NC_05 |       |   |         |                 |               |
|            |                   |                   |                   |      | 5258, |       |   |         |                 |               |
|            |                   |                   |                   |      | NC_05 |       |   |         |                 |               |
|            |                   |                   |                   |      | 5252, |       |   |         |                 |               |
|            |                   |                   |                   |      | NC_05 |       |   |         |                 |               |
|            |                   |                   |                   |      | 5257, |       |   |         |                 |               |
|            |                   |                   |                   |      | NC_05 |       |   |         |                 |               |
|            |                   |                   |                   |      | 5253, |       |   |         |                 |               |
|            |                   |                   |                   |      | NC_05 |       |   |         |                 |               |
|            |                   |                   |                   |      | 5256  |       |   |         |                 |               |
| Chenuda    | <i>Chenuda</i>    | <i>Orbivirus</i>  | <i>Reoviridae</i> | dsRN | NC_02 | Com   | ? | 1978    | A.              | Egypt,        |
| virus      | <i>virus</i>      |                   |                   | A    | 7534, | plete |   | (Karab  | <i>hermanni</i> | Uzbekistan    |
|            |                   |                   |                   |      | NC_02 | geno  |   | atsos,  | (Shi et al.,    | (Shi et al.,  |
|            |                   |                   |                   |      | 7535, | me    |   | 1978)   | 2018)           | 2018)         |

---

---



---

|              |                     |                  |                   |      |       |       |   |           |                      |               |
|--------------|---------------------|------------------|-------------------|------|-------|-------|---|-----------|----------------------|---------------|
|              |                     |                  |                   |      | NC_02 |       |   |           |                      |               |
|              |                     |                  |                   |      | 7536, |       |   |           |                      |               |
|              |                     |                  |                   |      | NC_02 |       |   |           |                      |               |
|              |                     |                  |                   |      | 7537, |       |   |           |                      |               |
|              |                     |                  |                   |      | NC_02 |       |   |           |                      |               |
|              |                     |                  |                   |      | 7538, |       |   |           |                      |               |
|              |                     |                  |                   |      | NC_02 |       |   |           |                      |               |
|              |                     |                  |                   |      | 7548, |       |   |           |                      |               |
|              |                     |                  |                   |      | NC_02 |       |   |           |                      |               |
|              |                     |                  |                   |      | 7549, |       |   |           |                      |               |
|              |                     |                  |                   |      | NC_02 |       |   |           |                      |               |
|              |                     |                  |                   |      | 7550, |       |   |           |                      |               |
|              |                     |                  |                   |      | NC_02 |       |   |           |                      |               |
|              |                     |                  |                   |      | 7551, |       |   |           |                      |               |
|              |                     |                  |                   |      | NC_02 |       |   |           |                      |               |
|              |                     |                  |                   |      | 7552  |       |   |           |                      |               |
| Chobar       | <i>Chobar</i>       | <i>Orbivirus</i> | <i>Reoviridae</i> | dsRN | NC_02 | Com   | ? | 1978      | <i>Ornithodoros</i>  | Nepal (Shi et |
| Gorge virus  | <i>Gorge virus</i>  |                  |                   | A    | 7553, | plete |   | (Karab    | <i>os</i> spp. (Shi  | al., 2018)    |
|              |                     |                  |                   |      | NC_02 | geno  |   | atsos,    | et al.,              |               |
|              |                     |                  |                   |      | 7554, | me    |   | 1978)     | 2018)                |               |
|              |                     |                  |                   |      | NC_02 |       |   |           |                      |               |
|              |                     |                  |                   |      | 7555, |       |   |           |                      |               |
|              |                     |                  |                   |      | NC_02 |       |   |           |                      |               |
|              |                     |                  |                   |      | 7556, |       |   |           |                      |               |
|              |                     |                  |                   |      | NC_02 |       |   |           |                      |               |
|              |                     |                  |                   |      | 7557, |       |   |           |                      |               |
|              |                     |                  |                   |      | NC_02 |       |   |           |                      |               |
|              |                     |                  |                   |      | 7558, |       |   |           |                      |               |
|              |                     |                  |                   |      | NC_02 |       |   |           |                      |               |
|              |                     |                  |                   |      | 7559, |       |   |           |                      |               |
|              |                     |                  |                   |      | NC_02 |       |   |           |                      |               |
|              |                     |                  |                   |      | 7560, |       |   |           |                      |               |
|              |                     |                  |                   |      | NC_02 |       |   |           |                      |               |
|              |                     |                  |                   |      | 7561, |       |   |           |                      |               |
|              |                     |                  |                   |      | NC_02 |       |   |           |                      |               |
|              |                     |                  |                   |      | 7562  |       |   |           |                      |               |
| Great Island | <i>Great Island</i> | <i>Orbivirus</i> | <i>Reoviridae</i> | dsRN | NC_01 | Com   | ? | 1981      | <i>I. uriae</i> (Shi | Canada (Shi   |
| virus        | <i>virus</i>        |                  |                   | A    | 4522, | plete |   | (Nuttal   | et al.,              | et al., 2018) |
|              |                     |                  |                   |      | NC_01 | geno  |   | l et al., | 2018)                |               |
|              |                     |                  |                   |      | 4523, | me    |   | 1981)     |                      |               |
|              |                     |                  |                   |      | NC_01 |       |   |           |                      |               |
|              |                     |                  |                   |      | 4524, |       |   |           |                      |               |
|              |                     |                  |                   |      | NC_01 |       |   |           |                      |               |
|              |                     |                  |                   |      | 4525, |       |   |           |                      |               |
|              |                     |                  |                   |      | NC_01 |       |   |           |                      |               |
|              |                     |                  |                   |      | 4526, |       |   |           |                      |               |

---



---

|                |                    |           |            |           |                                                                                                                                                                                        |                            |   |                                           |                                                                 |                                                         |  |
|----------------|--------------------|-----------|------------|-----------|----------------------------------------------------------------------------------------------------------------------------------------------------------------------------------------|----------------------------|---|-------------------------------------------|-----------------------------------------------------------------|---------------------------------------------------------|--|
|                |                    |           |            |           | NC_01                                                                                                                                                                                  |                            |   |                                           |                                                                 |                                                         |  |
|                |                    |           |            |           | 4527,                                                                                                                                                                                  |                            |   |                                           |                                                                 |                                                         |  |
|                |                    |           |            |           | NC_01                                                                                                                                                                                  |                            |   |                                           |                                                                 |                                                         |  |
|                |                    |           |            |           | 4528,                                                                                                                                                                                  |                            |   |                                           |                                                                 |                                                         |  |
|                |                    |           |            |           | NC_01                                                                                                                                                                                  |                            |   |                                           |                                                                 |                                                         |  |
|                |                    |           |            |           | 4529,                                                                                                                                                                                  |                            |   |                                           |                                                                 |                                                         |  |
|                |                    |           |            |           | NC_01                                                                                                                                                                                  |                            |   |                                           |                                                                 |                                                         |  |
|                |                    |           |            |           | 4530,                                                                                                                                                                                  |                            |   |                                           |                                                                 |                                                         |  |
|                |                    |           |            |           | NC_01                                                                                                                                                                                  |                            |   |                                           |                                                                 |                                                         |  |
|                |                    |           |            |           | 4531                                                                                                                                                                                   |                            |   |                                           |                                                                 |                                                         |  |
| Kemerovo virus | Great Island virus | Orbivirus | Reoviridae | dsRN<br>A | MF939<br>555,<br>MF939<br>556,<br>MF939<br>557,<br>MF939<br>558,<br>MF939<br>559,<br>MF939<br>560,<br>MF939<br>561,<br>MF939<br>562,<br>MF939<br>563,<br>MF939<br>564,<br>KJ0107<br>87 | Com<br>plete<br>geno<br>me | ? | 1970<br>(Libiko<br>va et<br>al.,<br>1970) | <i>I. persulcatu<br/>s, I. ricinus</i><br>(Shi et al.,<br>2018) | Russia,<br>Slovakia (Shi<br>et al., 2018)               |  |
| Lipovnik virus | Great Island virus | Orbivirus | Reoviridae | dsRN<br>A | HM543<br>475,<br>HM543<br>476,<br>HM543<br>477                                                                                                                                         | Parti<br>al<br>geno<br>me  | ? | 1964<br>(Libiko<br>va et<br>al.,<br>1964) | <i>I. ricinus</i><br>(Shi et al.,<br>2018)                      | Czech<br>Republic,<br>Slovakia (Shi<br>et al., 2018)    |  |
| Tribec virus   | Great Island virus | Orbivirus | Reoviridae | dsRN<br>A | HQ266<br>581,<br>HQ266<br>582,<br>HQ266<br>583,<br>HQ266<br>584,                                                                                                                       | Parti<br>al<br>geno<br>me  | ? | 1964<br>(Libiko<br>va et<br>al.,<br>1964) | <i>H. punctata, I. ricinus</i><br>(Shi et al.,<br>2018)         | Belorussia,<br>Italy,<br>Slovakia (Shi<br>et al., 2018) |  |



---



---

|             |              |                    |       |           |            |      |        |       |   |         |                     |              |  |
|-------------|--------------|--------------------|-------|-----------|------------|------|--------|-------|---|---------|---------------------|--------------|--|
|             |              |                    |       |           |            |      | HQ266  |       |   |         |                     |              |  |
|             |              |                    |       |           |            |      | 585,   |       |   |         |                     |              |  |
|             |              |                    |       |           |            |      | HQ266  |       |   |         |                     |              |  |
|             |              |                    |       |           |            |      | 586,   |       |   |         |                     |              |  |
|             |              |                    |       |           |            |      | HQ266  |       |   |         |                     |              |  |
|             |              |                    |       |           |            |      | 587,   |       |   |         |                     |              |  |
|             |              |                    |       |           |            |      | HQ266  |       |   |         |                     |              |  |
|             |              |                    |       |           |            |      | 588,   |       |   |         |                     |              |  |
|             |              |                    |       |           |            |      | HQ266  |       |   |         |                     |              |  |
|             |              |                    |       |           |            |      | 589,   |       |   |         |                     |              |  |
|             |              |                    |       |           |            |      | HQ266  |       |   |         |                     |              |  |
|             |              |                    |       |           |            |      | 590    |       |   |         |                     |              |  |
| St          | Croix        | St                 | Croix | Orbivirus | Reoviridae | dsRN | NC_00  | Com   | ? | 2001    | <i>I.</i>           | Kenya, USA   |  |
| River virus |              | <i>River virus</i> |       |           |            | A    | 6006,  | plete |   | (Attoui | <i>scapularis</i> , | (Alberdi et  |  |
|             |              |                    |       |           |            |      | NC_00  | geno  |   | et al., | <i>R.</i>           | al., 2012)   |  |
|             |              |                    |       |           |            |      | 5998,  | me    |   | 2001)   | <i>appendicul</i>   |              |  |
|             |              |                    |       |           |            |      | NC_00  |       |   |         | <i>atus</i> (Shi et |              |  |
|             |              |                    |       |           |            |      | 5999,  |       |   |         | al., 2018)          |              |  |
|             |              |                    |       |           |            |      | NC_00  |       |   |         |                     |              |  |
|             |              |                    |       |           |            |      | 6000,  |       |   |         |                     |              |  |
|             |              |                    |       |           |            |      | NC_00  |       |   |         |                     |              |  |
|             |              |                    |       |           |            |      | 6001,  |       |   |         |                     |              |  |
|             |              |                    |       |           |            |      | NC_00  |       |   |         |                     |              |  |
|             |              |                    |       |           |            |      | 6002,  |       |   |         |                     |              |  |
|             |              |                    |       |           |            |      | NC_00  |       |   |         |                     |              |  |
|             |              |                    |       |           |            |      | 6003.1 |       |   |         |                     |              |  |
|             |              |                    |       |           |            |      | ,      |       |   |         |                     |              |  |
|             |              |                    |       |           |            |      | NC_00  |       |   |         |                     |              |  |
|             |              |                    |       |           |            |      | 6004,  |       |   |         |                     |              |  |
|             |              |                    |       |           |            |      | NC_00  |       |   |         |                     |              |  |
|             |              |                    |       |           |            |      | 6005,  |       |   |         |                     |              |  |
|             |              |                    |       |           |            |      | NC_00  |       |   |         |                     |              |  |
|             |              |                    |       |           |            |      | 5997   |       |   |         |                     |              |  |
| Baku virus  | Unclassified |                    |       | Orbivirus | Reoviridae | dsRN | KY023  | Parti | ? | 1978    | <i>O.</i>           | Caspian Sea, |  |
|             |              |                    |       |           |            | A    | 349,   | al    |   | (Karab  | <i>maritimus</i>    | Uzbekistan   |  |
|             |              |                    |       |           |            |      | KY023  | geno  |   | atsos,  | (Shi et al.,        | (Shi et al., |  |
|             |              |                    |       |           |            |      | 350,   | me    |   | 1978)   | 2018)               | 2018)        |  |
|             |              |                    |       |           |            |      | KY023  |       |   |         |                     |              |  |
|             |              |                    |       |           |            |      | 351,   |       |   |         |                     |              |  |
|             |              |                    |       |           |            |      | KY023  |       |   |         |                     |              |  |
|             |              |                    |       |           |            |      | 352,   |       |   |         |                     |              |  |
|             |              |                    |       |           |            |      | KY023  |       |   |         |                     |              |  |
|             |              |                    |       |           |            |      | 353,   |       |   |         |                     |              |  |
|             |              |                    |       |           |            |      | KY023  |       |   |         |                     |              |  |
|             |              |                    |       |           |            |      | 354,   |       |   |         |                     |              |  |
|             |              |                    |       |           |            |      | KY023  |       |   |         |                     |              |  |

---

---



---

|                 |              |                  |                   |           |                                                                                                                                                                                                                                                                                               |                           |   |                                           |                                                                        |                                                                |
|-----------------|--------------|------------------|-------------------|-----------|-----------------------------------------------------------------------------------------------------------------------------------------------------------------------------------------------------------------------------------------------------------------------------------------------|---------------------------|---|-------------------------------------------|------------------------------------------------------------------------|----------------------------------------------------------------|
|                 |              |                  |                   |           | 355,                                                                                                                                                                                                                                                                                          |                           |   |                                           |                                                                        |                                                                |
|                 |              |                  |                   |           | KY023                                                                                                                                                                                                                                                                                         |                           |   |                                           |                                                                        |                                                                |
|                 |              |                  |                   |           | 356,                                                                                                                                                                                                                                                                                          |                           |   |                                           |                                                                        |                                                                |
|                 |              |                  |                   |           | KY023                                                                                                                                                                                                                                                                                         |                           |   |                                           |                                                                        |                                                                |
|                 |              |                  |                   |           | 357,                                                                                                                                                                                                                                                                                          |                           |   |                                           |                                                                        |                                                                |
|                 |              |                  |                   |           | KY023                                                                                                                                                                                                                                                                                         |                           |   |                                           |                                                                        |                                                                |
|                 |              |                  |                   |           | 358                                                                                                                                                                                                                                                                                           |                           |   |                                           |                                                                        |                                                                |
| Matucare virus  | Unclassified | <i>Orbivirus</i> | <i>Reoviridae</i> | dsRN<br>A | HQ397<br>640                                                                                                                                                                                                                                                                                  | Parti<br>al<br>geno<br>me | ? | 1970<br>(Justin<br>es et<br>al.,<br>1970) | Ot.<br><i>megnini</i><br>( <i>Palacios</i><br><i>et al.</i> ,<br>2011) |                                                                |
| Okhotskiy virus | Unclassified | <i>Orbivirus</i> | <i>Reoviridae</i> | dsRN<br>A | KY023<br>329,<br>KY023<br>330,<br>KY023<br>331,<br>KY023<br>332,<br>KY023<br>333,<br>KY023<br>334,<br>KY023<br>335,<br>KY023<br>336,<br>KY023<br>337,<br>KY023<br>338,<br>KF9816<br>23,<br>KF9816<br>24,<br>KF9816<br>25,<br>KF9816<br>26,<br>KF9816<br>27,<br>KF9816<br>28,<br>KF9816<br>29, | Parti<br>al<br>geno<br>me | ? | 1878<br>(L'vov<br>et al.,<br>1878)        | <i>I. uriae</i><br>(Pettersso<br>n et al.,<br>2020)                    | Northern<br>Sweden,<br>Okhotsk<br>(Pettersson<br>et al., 2020) |

---

|                             |                         |                  |                       |        |                                                                                                                        |                 |   |                                |                                                        |                                               |  |
|-----------------------------|-------------------------|------------------|-----------------------|--------|------------------------------------------------------------------------------------------------------------------------|-----------------|---|--------------------------------|--------------------------------------------------------|-----------------------------------------------|--|
|                             |                         |                  |                       |        | KF9816                                                                                                                 |                 |   |                                |                                                        |                                               |  |
|                             |                         |                  |                       |        | 30,                                                                                                                    |                 |   |                                |                                                        |                                               |  |
|                             |                         |                  |                       |        | KF9816                                                                                                                 |                 |   |                                |                                                        |                                               |  |
|                             |                         |                  |                       |        | 31,                                                                                                                    |                 |   |                                |                                                        |                                               |  |
|                             |                         |                  |                       |        | KF9816                                                                                                                 |                 |   |                                |                                                        |                                               |  |
|                             |                         |                  |                       |        | 32,                                                                                                                    |                 |   |                                |                                                        |                                               |  |
|                             |                         |                  |                       |        | MN83                                                                                                                   |                 |   |                                |                                                        |                                               |  |
|                             |                         |                  |                       |        | 0241,                                                                                                                  |                 |   |                                |                                                        |                                               |  |
|                             |                         |                  |                       |        | MN83                                                                                                                   |                 |   |                                |                                                        |                                               |  |
|                             |                         |                  |                       |        | 0242,                                                                                                                  |                 |   |                                |                                                        |                                               |  |
|                             |                         |                  |                       |        | MN83                                                                                                                   |                 |   |                                |                                                        |                                               |  |
|                             |                         |                  |                       |        | 0243,                                                                                                                  |                 |   |                                |                                                        |                                               |  |
|                             |                         |                  |                       |        | MN83                                                                                                                   |                 |   |                                |                                                        |                                               |  |
|                             |                         |                  |                       |        | 0244,                                                                                                                  |                 |   |                                |                                                        |                                               |  |
|                             |                         |                  |                       |        | MN83                                                                                                                   |                 |   |                                |                                                        |                                               |  |
|                             |                         |                  |                       |        | 0245                                                                                                                   |                 |   |                                |                                                        |                                               |  |
| Wad Medani virus            | <i>Wad Medani virus</i> | <i>Orbivirus</i> | <i>Reoviridae</i>     | dsRN A | NC_02 7533, NC_02 7539, NC_02 7540, NC_02 7541, NC_02 7542, NC_02 7543, NC_02 7544, NC_02 7545, NC_02 7546, NC_02 7547 | Complete genome | ? | 1966 (Taylor et al., 1966)     | <i>Hyalomma spp., R. sanguineus</i> (Shi et al., 2018) | Asia, East Africa, Jamaica (Shi et al., 2018) |  |
| Norway partiti-like virus 1 | Unclassified            | Unclassified     | <i>Partitiviridae</i> | dsRN A | MF141 076                                                                                                              | Partial genome  | ? | 2017 (Pettersson et al., 2017) | <i>I. ricinus</i> (Pettersson et al., 2017)            | Norway (Pettersson et al., 2017)              |  |
| Lonestar tick totivirus     | Unclassified            | Unclassified     | <i>Totiviridae</i>    | dsRN A | MG647 775, MZ567 079                                                                                                   | Partial genome  | ? | 2018 (Tokarz et al., 2018)     | <i>I. scapularis</i> (Tokarz et al., 2018)             | USA (Tokarz et al., 2018)                     |  |

|                       |              |              |                               |           |                                                                                                                                                                                                          |                           |   |                               |                                               |                                    |
|-----------------------|--------------|--------------|-------------------------------|-----------|----------------------------------------------------------------------------------------------------------------------------------------------------------------------------------------------------------|---------------------------|---|-------------------------------|-----------------------------------------------|------------------------------------|
| Fennes virus          | Unclassified | Unclassified | <i>Unclassified Riboviria</i> | dsRN<br>A | MT025<br>166,<br>MT025<br>167,<br>MT025<br>168,<br>MT025<br>169,<br>MN83<br>0240                                                                                                                         | Parti<br>al<br>geno<br>me | ? | 2020<br>(Wille et al., 2020)  | <i>I. uriae</i><br>(Wille et al., 2020)       | Antarctica<br>(Wille et al., 2020) |
| Shelly Beach virus    | Unclassified | Unclassified | <i>Unclassified Riboviria</i> | dsRN<br>A | MK026<br>600,<br>MK026<br>601,<br>MK026<br>602,<br>MK026<br>603,<br>MK026<br>604,<br>MK026<br>605                                                                                                        | Parti<br>al<br>geno<br>me | ? | 2018<br>(Harvey et al., 2018) | <i>I. holocyclus</i><br>(Harvey et al., 2018) | Australia<br>(Harvey et al., 2018) |
| Shelly headland virus | Unclassified | Unclassified | <i>Unclassified Riboviria</i> | dsRN<br>A | OL452<br>144,<br>OL452<br>150,<br>OL452<br>158,<br>OL452<br>171,<br>OL452<br>185,<br>OL452<br>194,<br>OL452<br>203,<br>OL452<br>214,<br>OL452<br>222,<br>OL452<br>151,<br>OL452<br>172,<br>OL452<br>215, | Parti<br>al<br>geno<br>me | ? | 2018<br>(Harvey et al., 2018) | <i>I. holocyclus</i><br>(Harvey et al., 2018) | Australia<br>(Harvey et al., 2018) |

---

OL452

223,

OL452

173,

OL452

216,

OL452

224,

OL452

174,

OL452

217,

OL452

225,

OL452

175,

OL452

226,

OL452

218,

OL452

227,

OL452

228,

OL452

176,

OL452

178,

OL452

229,

OL452

179,

OL452

219,

OL452

230,

OL452

180,

OL452

220,

OL452

231,

OL452

232,

OL452

181,

---

|                          |                              |                |                   |           |            |                 |   |      |                                                                                                       |                                                                                                          |  |
|--------------------------|------------------------------|----------------|-------------------|-----------|------------|-----------------|---|------|-------------------------------------------------------------------------------------------------------|----------------------------------------------------------------------------------------------------------|--|
|                          |                              |                |                   |           |            | OL452           |   |      |                                                                                                       |                                                                                                          |  |
|                          |                              |                |                   |           |            | 221,            |   |      |                                                                                                       |                                                                                                          |  |
|                          |                              |                |                   |           |            | OL452           |   |      |                                                                                                       |                                                                                                          |  |
|                          |                              |                |                   |           |            | 233,            |   |      |                                                                                                       |                                                                                                          |  |
|                          |                              |                |                   |           |            | OL452           |   |      |                                                                                                       |                                                                                                          |  |
|                          |                              |                |                   |           |            | 182,            |   |      |                                                                                                       |                                                                                                          |  |
|                          |                              |                |                   |           |            | OL452           |   |      |                                                                                                       |                                                                                                          |  |
|                          |                              |                |                   |           |            | 234,            |   |      |                                                                                                       |                                                                                                          |  |
|                          |                              |                |                   |           |            | OL452           |   |      |                                                                                                       |                                                                                                          |  |
|                          |                              |                |                   |           |            | 235,            |   |      |                                                                                                       |                                                                                                          |  |
|                          |                              |                |                   |           |            | MK026           |   |      |                                                                                                       |                                                                                                          |  |
|                          |                              |                |                   |           |            | 577,            |   |      |                                                                                                       |                                                                                                          |  |
|                          |                              |                |                   |           |            | MK026           |   |      |                                                                                                       |                                                                                                          |  |
|                          |                              |                |                   |           |            | 581,            |   |      |                                                                                                       |                                                                                                          |  |
|                          |                              |                |                   |           |            | MK026           |   |      |                                                                                                       |                                                                                                          |  |
|                          |                              |                |                   |           |            | 582             |   |      |                                                                                                       |                                                                                                          |  |
| Lonestar tick chuvirus 1 | <i>Mivirus amblyomm ae</i>   | <i>Mivirus</i> | <i>Chuviridae</i> | ssRN A(-) | NC_03 0204 | Complete genome | ? | 2018 | <i>Am. americanum</i> (Tokarz et al., 2018)                                                           | USA (Tokarz et al., 2018)                                                                                |  |
| Bole tick virus 3        | <i>Mivirus boleense</i>      | <i>Mivirus</i> | <i>Chuviridae</i> | ssRN A(-) | NC_02 8259 | Complete genome | ? | 2015 | <i>Hy. Asiaticum</i> , <i>Hy. Aegyptium</i> , <i>R. turanicus</i> , <i>R. bursa</i> (Li et al., 2015) | China, Turkey (Li et al., 2015; Brinkmann et al., 2018; Ergunay et al., 2020)                            |  |
| Changping tick virus 2   | <i>Mivirus changpingense</i> | <i>Mivirus</i> | <i>Chuviridae</i> | ssRN A(-) | NC_02 8260 | Complete genome | ? | 2015 | <i>Dermacentor spp.</i> , <i>H. parva</i> , <i>R. sanguineus</i> (Li et al., 2015)                    | China, Thailand, Turkey, Trinidad, Tobago (Li et al., 2015; Brinkmann et al., 2018; Temmam et al., 2019) |  |

|                              |                            |                     |                   |           |             |                 |         |                              |                                                                            |                                                                                                       |
|------------------------------|----------------------------|---------------------|-------------------|-----------|-------------|-----------------|---------|------------------------------|----------------------------------------------------------------------------|-------------------------------------------------------------------------------------------------------|
| Changping tick virus 3       | <i>Mivirus dermatensis</i> | <i>Mivirus</i>      | <i>Chuviridae</i> | ssRN A(-) | NC_02 8261  | Complete genome | ?       | 2015 (Li et al., 2015)       | <i>Dermacentor spp. (Li et al., 2015)</i>                                  | China (Li et al., 2015)                                                                               |
| Genoa virus                  | <i>Mivirus genovaense</i>  | <i>Mivirus</i>      | <i>Chuviridae</i> | ssRN A(-) | OL452 069   | Complete genome | ?       | 2018 (Harvey et al., 2018)   | <i>I. holocyclus (Harvey et al., 2018)</i>                                 | Australia (Harvey et al., 2018)                                                                       |
| Suffolk virus                | <i>Mivirus suffolkense</i> | <i>Mivirus</i>      | <i>Chuviridae</i> | ssRN A(-) | NC_02 8243  | Complete genome | ?       | 2018 (Tokarz et al., 2018)   | <i>I. scapularis (Tokarz et al., 2018)</i>                                 | USA (Tokarz et al., 2018)                                                                             |
| Wuhan tick virus 2           | <i>Mivirus wuhanense</i>   | <i>Mivirus</i>      | <i>Chuviridae</i> | ssRN A(-) | NC_02 8266  | Complete genome | ?       | 2015 (Li et al., 2015)       | <i>H. longicornis, R. microplus (Gómez et al., 2020; Xu et al., 2021)</i>  | Brazil, China, Colombia, Guadeloupe, Thailand, Trinidad, Tobago (Gomez et al., 2020; Xu et al., 2021) |
| Wuhan mivirus                | <i>Wuhan mivirus</i>       | <i>Mivirus</i>      | <i>Chuviridae</i> | ssRN A(-) | MZ244 267   | Complete genome | ?       | 2015 (Li et al., 2015)       | <i>H. longicornis, R. microplus, R. sanguineus (Sameroff et al., 2019)</i> | China, Thailand, Trinidad and Tobago (Sameroff et al., 2019)                                          |
| Tacheng tick virus 4         | <i>Morsusvirus argatis</i> | <i>Morsusvirus</i>  | <i>Chuviridae</i> | ssRN A(-) | NC_02 8263  | Complete genome | ?       | 2015 (Li et al., 2015)       | <i>A. miniatus (Li et al., 2015)</i>                                       | China (Li et al., 2015)                                                                               |
| Blacklegged tick chuvirus 2  | <i>Nigecruvirus ixodes</i> | <i>Nigecruvirus</i> | <i>Chuviridae</i> | ssRN A(-) | MF360 789   | Complete genome | ?       | 2018 (Tokarz et al., 2018)   | <i>I. scapularis (Tokarz et al., 2018)</i>                                 | USA (Tokarz et al., 2018)                                                                             |
| Amblyomma dissimile mivirus* | Unclassified               | <i>Mivirus</i>      | <i>Chuviridae</i> | ssRN A(-) | MZ502 309.1 | Complete genome | ?       | 2021 (Sameroff et al., 2021) | <i>Am. dissimile (Sameroff et al., 2021)</i>                               | Trinidad and Tobago (Sameroff et al., 2021)                                                           |
| Nuomin virus*                | Unclassified               | Unclassified        | <i>Chuviridae</i> | ssRN A(-) | MW02 9986.1 | Partial         | Y (Quan | 2020 (Quan                   | <i>I. persulcatus, I.</i>                                                  | China (Quan et al., 2020)                                                                             |

|                         |                                                |                             |                          |              |                                                   |                            |                  |                                                  |                                                                                                                           |                                                              |
|-------------------------|------------------------------------------------|-----------------------------|--------------------------|--------------|---------------------------------------------------|----------------------------|------------------|--------------------------------------------------|---------------------------------------------------------------------------------------------------------------------------|--------------------------------------------------------------|
|                         |                                                |                             |                          |              |                                                   | geno<br>me                 | et al.,<br>2020) | et al.,<br>2020)                                 | <i>crenulatus</i> ,<br><i>H.</i><br><i>conicinna</i> ,<br><i>H.</i><br><i>longicornis</i><br>( <i>Quan et al., 2020</i> ) |                                                              |
| Tacheng<br>tick virus 6 | <i>Tacheng<br/>arlivirus</i>                   | <i>Arlivirus</i>            | <i>Lispiviridae</i>      | ssRN<br>A(-) | NC_03<br>1270                                     | Com<br>plete<br>geno<br>me | ?                | 2015<br>(Li et al.,<br>2015)                     | <i>A. miniatus</i><br>(Li et al.,<br>2015)                                                                                | China (Li et al., 2015)                                      |
| Grotenhout<br>virus     | <i>Grotenhout<br/>norwavirus</i>               | <i>Norwavirus</i>           | <i>Nairovirida<br/>e</i> | ssRN<br>A(-) | KY700<br>684,<br>KY700<br>683                     | Com<br>plete<br>geno<br>me | ?                | 2017<br>(Vanm<br>echele<br>n et<br>al.,<br>2017) | <i>I. ricinus</i><br>(Vanmech<br>elen et al.,<br>2017)                                                                    | Belgium<br>(Vanmechel<br>en et al.,<br>2017)                 |
| Abu<br>Hammad<br>virus  | <i>Abu<br/>Hammad<br/>orthonairov<br/>irus</i> | <i>Orthonairov<br/>irus</i> | <i>Nairovirida<br/>e</i> | ssRN<br>A(-) | KU925<br>434,<br>KU925<br>435,<br>KU925<br>436    | Com<br>plete<br>geno<br>me | ?                | 1976<br>(Darwi<br>sh et<br>al.,<br>1976)         | <i>A. hermanni</i><br>(Darwish<br>et al.,<br>1976)                                                                        | Egypt<br>(Darwish et al., 1976)                              |
| Abu Mina<br>virus       | <i>Abu Mina<br/>orthonairov<br/>irus</i>       | <i>Orthonairov<br/>irus</i> | <i>Nairovirida<br/>e</i> | ssRN<br>A(-) | KU925<br>437,<br>KU925<br>438,<br>KU925<br>439    | Com<br>plete<br>geno<br>me | ?                | 1976<br>(Darwi<br>sh et<br>al.,<br>1976)         | <i>A. streptopeli<br/>a</i> (Darwish<br>et al.,<br>1976)                                                                  | Egypt<br>(Darwish et al., 1976)                              |
| Artashat<br>virus       | <i>Artashat<br/>orthonairov<br/>irus</i>       | <i>Orthonairov<br/>irus</i> | <i>Nairovirida<br/>e</i> | ssRN<br>A(-) | NC_04<br>3440,<br>NC_04<br>3442,<br>NC_04<br>3441 | Com<br>plete<br>geno<br>me | ?                | 2014<br>(Al'kho<br>vskii et<br>al.,<br>2014)     | <i>O. alactagalis</i><br>(Al'khovski<br>i et al.,<br>2014)                                                                | Armenia,<br>Azerbaijan<br>(Al'khovskii<br>et al., 2014)      |
| Avalon<br>virus         | <i>Avalon<br/>orthonairov<br/>irus</i>         | <i>Orthonairov<br/>irus</i> | <i>Nairovirida<br/>e</i> | ssRN<br>A(-) | NC_04<br>0460,<br>NC_04<br>0459,<br>NC_04<br>0458 | Com<br>plete<br>geno<br>me | ?                | 1976<br>(Main<br>et al.,<br>1976)                | <i>I. uriae</i><br>(Pettersso<br>n et al.,<br>2020)                                                                       | Canada,<br>France,<br>Sweden<br>(Pettersson<br>et al., 2020) |
| Burana<br>virus         | <i>Burana<br/>orthonairov<br/>irus</i>         | <i>Orthonairov<br/>irus</i> | <i>Nairovirida<br/>e</i> | ssRN<br>A(-) | NC_04<br>3439,<br>NC_04<br>3438,                  | Com<br>plete<br>geno<br>me | ?                | 2014<br>(L'vov<br>et al.,<br>2014)               | <i>H. punctate</i><br>(L'vov et al.,<br>2014)                                                                             | Kyrgyzstan<br>(L'vov et al., 2014)                           |



|                                       |                                                        |                        |                     |              |                                                   |                            |                                        |                                                   |                                                                                                                                            |                                                                                                                                              |  |
|---------------------------------------|--------------------------------------------------------|------------------------|---------------------|--------------|---------------------------------------------------|----------------------------|----------------------------------------|---------------------------------------------------|--------------------------------------------------------------------------------------------------------------------------------------------|----------------------------------------------------------------------------------------------------------------------------------------------|--|
|                                       |                                                        |                        |                     |              | NC_04<br>3437                                     |                            |                                        |                                                   |                                                                                                                                            |                                                                                                                                              |  |
| Chim virus                            | <i>Chim orthonairovirus</i>                            | <i>Orthonairovirus</i> | <i>Nairoviridae</i> | ssRN<br>A(-) | NC_04<br>3434,<br>NC_04<br>3436,                  | Com<br>plete<br>geno<br>me | ?                                      | 2014<br>(L'vov<br>et al.,<br>2014)                | <i>O. tartakovskiy</i> (L'vov et al., 2014)                                                                                                | Uzbekistan<br>(L'vov et al., 2014)                                                                                                           |  |
|                                       |                                                        |                        |                     |              | NC_04<br>3435                                     |                            |                                        |                                                   |                                                                                                                                            |                                                                                                                                              |  |
| Crimean-Congo hemorrhagic fever virus | <i>Crimean-Congo hemorrhagic fever orthonairovirus</i> | <i>Orthonairovirus</i> | <i>Nairoviridae</i> | ssRN<br>A(-) | NC_00<br>5301,<br>NC_00<br>5300,<br>NC_00<br>5302 | Com<br>plete<br>geno<br>me | Y<br>(Garri<br>son et<br>al.,<br>2020) | 1945<br>(Grash<br>chenk<br>ov et<br>al.,<br>1945) | <i>Hy. asiaticum</i> ,<br><i>Hy. marginatum</i> ,<br><i>ixodid</i><br>spp.,<br><i>R. rossicus</i><br>(Shi et al., 2018; Zhao et al., 2021) | Many<br>countries in<br>Asia and<br>Africa; parts<br>of Europe<br>(e.g.<br>Albania,<br>Bulgaria)<br>(Shi et al., 2018)<br>(Shi et al., 2021) |  |
| Dera Ghazi Khan virus                 | <i>Dera Ghazi Khan orthonairovirus</i>                 | <i>Orthonairovirus</i> | <i>Nairoviridae</i> | ssRN<br>A(-) | NC_03<br>4520,<br>NC_03<br>4510,<br>NC_03<br>4521 | Com<br>plete<br>geno<br>me | ?                                      | 1970<br>(Begu<br>m et<br>al.,<br>1970)            | <i>Hy. dromedarii</i><br>(Begum et al., 1970)                                                                                              | Pakistan<br>(Begum et al., 1970)                                                                                                             |  |
| Dugbe virus                           | <i>Dugbe orthonairovirus</i>                           | <i>Orthonairovirus</i> | <i>Nairoviridae</i> | ssRN<br>A(-) | NC_00<br>4159,<br>NC_00<br>4158,<br>NC_00<br>4157 | Com<br>plete<br>geno<br>me | Y<br>(Garri<br>son et<br>al.,<br>2020) | 1973<br>(David<br>-West<br>et al.,<br>1973)       | <i>Am. variegatum</i> ,<br><i>B. decoloratus</i> ,<br><i>Hy. truncatum</i> ,<br>and <i>R. appendiculatus</i> (Shi et al., 2018)            | Sub-Saharan<br>Africa (Shi et al., 2018)                                                                                                     |  |
| Estero Real virus                     | <i>Estero Real orthonairovirus</i>                     | <i>Orthonairovirus</i> | <i>Nairoviridae</i> | ssRN<br>A(-) | MH017<br>280,<br>MH017<br>286,<br>MH017<br>274    | Com<br>plete<br>geno<br>me | ?                                      | 1985<br>(Malko<br>va et<br>al.,<br>1985)          | <i>O. tadaridae</i><br>(D Malkova et al., 1985)                                                                                            | Cuba (D<br>Malkova et al., 1985)                                                                                                             |  |
| Hazara virus                          | <i>Hazara orthonairovirus</i>                          | <i>Orthonairovirus</i> | <i>Nairoviridae</i> | ssRN<br>A(-) | NC_03<br>8709,<br>NC_03<br>8710,                  | Com<br>plete<br>geno<br>me | ?                                      | 1970<br>(Begu<br>m et<br>al.,<br>1970)            | <i>I. redikorzevi</i><br>(Begum et al., 1970)                                                                                              | Japan,<br>Pakistan<br>(Begum et al., 1970; 1970)                                                                                             |  |

|                         |                                           |                             |                          |              |                                                   |                            |   |                                           |                                                                            |  |                                                                  |
|-------------------------|-------------------------------------------|-----------------------------|--------------------------|--------------|---------------------------------------------------|----------------------------|---|-------------------------------------------|----------------------------------------------------------------------------|--|------------------------------------------------------------------|
|                         |                                           |                             |                          |              | NC_03<br>8711                                     |                            |   |                                           |                                                                            |  | Matsumoto<br>et al., 2019)                                       |
| Huangpi<br>tick virus 1 | <i>Huangpi<br/>orthonairov<br/>irus</i>   | <i>Orthonairov<br/>irus</i> | <i>Nairovirida<br/>e</i> | ssRN<br>A(-) | NC_03<br>1135,<br>NC_03<br>1136,<br>NC_03<br>1137 | Com<br>plete<br>geno<br>me | ? | 2015<br>(Li et<br>al.,<br>2015)           | <i>H. doenitzi</i> ,<br><i>H.<br/>longicornis</i><br>(Shi et al.,<br>2018) |  | China (Shi et<br>al., 2018)                                      |
| Caspiy virus            | <i>Hughes<br/>orthonairov<br/>irus</i>    | <i>Orthonairov<br/>irus</i> | <i>Nairovirida<br/>e</i> | ssRN<br>A(-) | KP792<br>708,<br>KP792<br>709,<br>KP792<br>710    | Com<br>plete<br>geno<br>me | ? | 2014<br>(L'vov<br>et al.,<br>2014)        | <i>Argasidae</i><br>(L'vov et<br>al., 2014)                                |  | Azerbaijan<br>(L'vov et al.,<br>2014)                            |
| Farallon<br>virus       | <i>Hughes<br/>orthonairov<br/>irus</i>    | <i>Orthonairov<br/>irus</i> | <i>Nairovirida<br/>e</i> | ssRN<br>A(-) | NC_03<br>4502,<br>NC_03<br>4494,<br>NC_03<br>4503 | Com<br>plete<br>geno<br>me | ? | 1967<br>(Radov<br>sky et<br>al.,<br>1967) | <i>Ornithodor<br/>us</i> spp. (Shi<br>et al.,<br>2018)                     |  | USA (Shi et<br>al., 2018)                                        |
| Great<br>Saltee virus   | <i>Hughes<br/>orthonairov<br/>irus</i>    | <i>Orthonairov<br/>irus</i> | <i>Nairovirida<br/>e</i> | ssRN<br>A(-) | KU925<br>467,<br>KU925<br>468,<br>KU925<br>469    | Com<br>plete<br>geno<br>me | ? | 1976<br>(Keira<br>ns et<br>al.,<br>1976)  | <i>O.<br/>maritimus</i><br>(Kuhn et<br>al., 2016)                          |  | Ireland<br>(Great<br>Saltee<br>Island)<br>(Kuhn et al.,<br>2016) |
| Hughes<br>virus         | <i>Hughes<br/>orthonairov<br/>irus</i>    | <i>Orthonairov<br/>irus</i> | <i>Nairovirida<br/>e</i> | ssRN<br>A(-) | KU925<br>470,<br>KU925<br>471,<br>KU925<br>472    | Com<br>plete<br>geno<br>me | ? | 1964<br>(Hugh<br>es et<br>al.,<br>1964)   | <i>O.<br/>denmarki</i><br>(Shi et al.,<br>2018)                            |  | Cuba,<br>Trinidad,<br>USA,<br>Venezuela<br>(Shi et al.,<br>2018) |
| Raza virus              | <i>Hughes<br/>orthonairov<br/>irus</i>    | <i>Orthonairov<br/>irus</i> | <i>Nairovirida<br/>e</i> | ssRN<br>A(-) | KU925<br>479,<br>KU925<br>480,<br>KU925<br>481    | Com<br>plete<br>geno<br>me | ? | 1968<br>(Cliffor<br>d et<br>al.,<br>1968) | <i>O.<br/>denmarki</i><br>(Kuhn et<br>al., 2016)                           |  | Mexico<br>(Kuhn et al.,<br>2016)                                 |
| Issyk-kul<br>virus      | <i>Issyk-kul<br/>orthonairov<br/>irus</i> | <i>Orthonairov<br/>irus</i> | <i>Nairovirida<br/>e</i> | ssRN<br>A(-) | KF8920<br>55,<br>KF8920<br>56,<br>KF8920<br>57    | Com<br>plete<br>geno<br>me | ? | 1973<br>(L'vov<br>et al.,<br>1973)        | <i>A.<br/>vespertilion</i><br><i>is</i> (L'vov et<br>al., 1973)            |  | Kyrgyzstan<br>(Atkinson et<br>al., 2015)                         |

|                             |                                              |                        |                     |           |                                    |                 |                         |      |                                                                                                                                                      |                                             |
|-----------------------------|----------------------------------------------|------------------------|---------------------|-----------|------------------------------------|-----------------|-------------------------|------|------------------------------------------------------------------------------------------------------------------------------------------------------|---------------------------------------------|
| Kasokero virus              | <i>Kasokero orthonairovirus</i>              | <i>Orthonairovirus</i> | <i>Nairoviridae</i> | ssRN A(-) | NC_03_6636, NC_02_9933, NC_02_9932 | Complete genome | ?                       | 1986 | <i>O. faini</i> (Amy et al., 2020)                                                                                                                   | Uganda (Walker et al., 2015)                |
| Keterah virus               | <i>Keterah orthonairovirus</i>               | <i>Orthonairovirus</i> | <i>Nairoviridae</i> | ssRN A(-) | NC_03_4392, NC_03_4388, NC_03_4389 | Complete genome | ?                       | 1976 | <i>Argasidae</i> (Varma et al., 1976)                                                                                                                | Malaysia (Varma et al., 1976)               |
| Kupe virus                  | <i>Kupe orthonairovirus</i>                  | <i>Orthonairovirus</i> | <i>Nairoviridae</i> | ssRN A(-) | EU257_628, EU257_627, EU257_626    | Complete genome | ?                       | 2009 | <i>Am. gemma</i> , <i>R. pulchellus</i> (Crabtree et al., 2009)                                                                                      | Kenya (Crabtree et al., 2009)               |
| Meram virus                 | <i>Meram orthonairovirus</i>                 | <i>Orthonairovirus</i> | <i>Nairoviridae</i> | ssRN A(-) | MN97_2594, MN97_2595, MN97_2596    | Complete genome | ?                       | 2020 | <i>Hy. aegyptium</i> (Ergunay et al., 2020)                                                                                                          | Turkey (Ergunay et al., 2020)               |
| Nairobi sheep disease virus | <i>Nairobi sheep disease orthonairovirus</i> | <i>Orthonairovirus</i> | <i>Nairoviridae</i> | ssRN A(-) | NC_03_4387, NC_03_4391, NC_03_4386 | Complete genome | Y (Yadvav et al., 2011) | 1969 | <i>Am. variegatum</i> , <i>H. longicornis</i> , <i>H. intermedia</i> , <i>R. appendiculatus</i> , <i>R. hemaphysaloides</i> (Dandawate et al., 1969) | China, Kenya, India (Krašteva et al., 2020) |
| Pacific coast nairovirus    | <i>Pacific Coast orthonairovirus</i>         | <i>Orthonairovirus</i> | <i>Nairoviridae</i> | ssRN A(-) | KU933_933, KU933_934, KU933_935    | Complete genome | ?                       | 2017 | <i>D. occidentalis</i> (Bouquet et al., 2017)                                                                                                        | USA (Bouquet et al., 2017)                  |

|                     |                                 |                        |                     |           |                                    |                 |   |      |                                                               |                                                                                                     |
|---------------------|---------------------------------|------------------------|---------------------|-----------|------------------------------------|-----------------|---|------|---------------------------------------------------------------|-----------------------------------------------------------------------------------------------------|
| Punta Salinas virus | <i>Punta orthonairovirus</i>    | <i>Orthonairovirus</i> | <i>Nairoviridae</i> | ssRN A(-) | KU925 473, KU925 474, KU925 475    | Complete genome | ? | 1981 | <i>O. amblus</i> (Kuhn et al., 2016)                          | Peru (Kuhn et al., 2016)                                                                            |
| Bandia virus        | <i>Qalyub orthonairovirus</i>   | <i>Orthonairovirus</i> | <i>Nairoviridae</i> | ssRN A(-) | KU925 446, KU925 447, KU925 448    | Complete genome | ? | 1967 | <i>O. sonrai</i> (Kuhn et al., 2016)                          | Senegal (Kuhn et al., 2016)                                                                         |
| Geran virus         | <i>Qalyub orthonairovirus</i>   | <i>Orthonairovirus</i> | <i>Nairoviridae</i> | ssRN A(-) | KP792 714, KP792 715, KP792 716    | Complete genome | ? | 2014 | <i>O. asperus</i> (Kuhn et al., 2016)                         | Azerbaijan (Kuhn et al., 2016)                                                                      |
| Qalyub virus        | <i>Qalyub orthonairovirus</i>   | <i>Orthonairovirus</i> | <i>Nairoviridae</i> | ssRN A(-) | NC_03 4511, NC_03 4522, NC_03 4512 | Complete genome | ? | 1952 | <i>O. asperus</i> , <i>O. erraticus</i> (Walker et al., 2016) | Azerbaijan, Egypt, Senegal (Kuhn et al., 2016; Walker et al., 2016)                                 |
| Clo Mor virus       | <i>Sakhalin orthonairovirus</i> | <i>Orthonairovirus</i> | <i>Nairoviridae</i> | ssRN A(-) | NC_03 4561, NC_03 4554, NC_03 4562 | Complete genome | ? | 1976 | <i>A. cooleyi</i> , <i>I. uriae</i> (Walker et al., 2016)     | UK, USA (Walker et al., 2016)                                                                       |
| Sakhalin virus      | <i>Sakhalin orthonairovirus</i> | <i>Orthonairovirus</i> | <i>Nairoviridae</i> | ssRN A(-) | KU925 482, KU925 483, KU925 484    | Complete genome | ? | 1972 | <i>I. uriae</i> (Kuhn et al., 2016)                           | Antarctica, Australia, Russia, USA (L'vov et al., 2014; Kuhn et al., 2016; Pettersson et al., 2020) |
| Taggert virus       | <i>Sakhalin orthonairovirus</i> | <i>Orthonairovirus</i> | <i>Nairoviridae</i> | ssRN A(-) | KU925 491, KU925 492, KU925 493    | Complete genome | ? | 1985 | <i>I. uriae</i> (Pettersson et al., 2020)                     | Antarctica, Australia (Pettersson et al., 2020; Wille et al., 2020)                                 |

|                      |                                     |                        |                     |           |                                    |                 |   |      |                                                                                                          |                                                                                 |
|----------------------|-------------------------------------|------------------------|---------------------|-----------|------------------------------------|-----------------|---|------|----------------------------------------------------------------------------------------------------------|---------------------------------------------------------------------------------|
| Tillamook virus      | <i>Sakhalin orthonairovirus</i>     | <i>Orthonairovirus</i> | <i>Nairoviridae</i> | ssRN A(-) | KU925 494, KU925 495, KU925 496    | Complete genome | ? | 1973 | <i>I. uriae</i> (Kuhn et al., 2016)                                                                      | USA (Kuhn et al., 2016)                                                         |
| Soldado virus        | <i>Soldado orthonairovirus</i>      | <i>Orthonairovirus</i> | <i>Nairoviridae</i> | ssRN A(-) | KU925 488, KU925 489, KU925 490    | Complete genome | ? | 1973 | <i>O. maritimus</i> (Shi et al., 2018)                                                                   | France, Great Britain, Indian Ocean, North Wales, Seychelles (Shi et al., 2018) |
| Tacheng tick virus 1 | <i>Tacheng orthonairovirus</i>      | <i>Orthonairovirus</i> | <i>Nairoviridae</i> | ssRN A(-) | NC_03 1284, NC_03 1285, NC_03 1286 | Complete genome | Y | 2015 | <i>D. marginatus</i> , <i>D. nuttalli</i> , <i>D. silvarum</i> , <i>Hy. asiaticum</i> (Shi et al., 2018) | China, Kazakhstan (Shi et al., 2018)                                            |
| Tamdy virus          | <i>Tamdy orthonairovirus</i>        | <i>Orthonairovirus</i> | <i>Nairoviridae</i> | ssRN A(-) | MN79 2651, MN79 2652, MN79 2653    | Complete genome | Y | 2014 | <i>Hy. asiaticum</i> (L'vov et al., 1984; Moming et al., 2021)                                           | China, Uzbekistan (Moming et al., 2021)                                         |
| Tofla virus          | <i>Tofla orthonairovirus</i>        | <i>Orthonairovirus</i> | <i>Nairoviridae</i> | ssRN A(-) | NC_02 9124, NC_02 9123, NC_02 9122 | Complete genome | ? | 2016 | <i>H. flava</i> , <i>H. formsensis</i> (Shimada et al., 2016)                                            | Japan (Shimada et al., 2016)                                                    |
| Tunis virus          | <i>Tunis orthonairovirus</i>        | <i>Orthonairovirus</i> | <i>Nairoviridae</i> | ssRN A(-) | NC_04 0770, NC_04 0771, NC_04 0772 | Complete genome | ? | 1994 | <i>A. hermanni</i> (Chastel et al., 1994)                                                                | Tunisia (Chastel et al., 1994)                                                  |
| Vinegar Hill virus   | <i>Vinegar Hill orthonairovirus</i> | <i>Orthonairovirus</i> | <i>Nairoviridae</i> | ssRN A(-) | MF176 881, MF176                   | Complete genome | ? | 2017 | <i>A. robertsi</i> (Gauci et al., 2017)                                                                  | Australia (Gauci et al., 2017)                                                  |

|             |                     |                     |                    |      |        |       |   |           |                      |               |  |
|-------------|---------------------|---------------------|--------------------|------|--------|-------|---|-----------|----------------------|---------------|--|
|             |                     |                     |                    |      | 882,   | geno  |   |           | et al.,              |               |  |
|             |                     |                     |                    |      | MF176  | me    |   |           | 2017)                |               |  |
|             |                     |                     |                    |      | 883    |       |   |           |                      |               |  |
| Wenzhou     | <i>Wenzhou</i>      | <i>Orthonairov</i>  | <i>Nairovirida</i> | ssRN | NC_03  | Com   | ? | 2015      | <i>H. hystricis</i>  | China (Li et  |  |
| tick virus  | <i>orthonairov</i>  | <i>irus</i>         | <i>e</i>           | A(-) | 1291,  | plete |   | (Li et    | (Li et al.,          | al., 2015)    |  |
|             | <i>irus</i>         |                     |                    |      | NC_03  | geno  |   | al.,      | 2015)                |               |  |
|             |                     |                     |                    |      | 1288,  | me    |   | 2015)     |                      |               |  |
|             |                     |                     |                    |      | NC_03  |       |   |           |                      |               |  |
|             |                     |                     |                    |      | 1289   |       |   |           |                      |               |  |
| South Bay   | <i>South Bay</i>    | <i>Sabavirus</i>    | <i>Nairovirida</i> | ssRN | KJ7468 | Com   | ? | 2014      | <i>D. nuttalli</i> , | China, USA    |  |
| virus       | <i>sabavirus</i>    |                     | <i>e</i>           | A(-) | 78,    | plete |   | (Tokar    | <i>H.</i>            | (Tokarz et    |  |
|             |                     |                     |                    |      | KJ7468 | geno  |   | z et al., | <i>concinna</i> ,    | al., 2014;    |  |
|             |                     |                     |                    |      | 77     | me    |   | 2014)     | <i>H.</i>            | Zhao et al.,  |  |
|             |                     |                     |                    |      |        |       |   |           | <i>longicornis</i>   | 2021)         |  |
|             |                     |                     |                    |      |        |       |   |           | , <i>I.</i>          |               |  |
|             |                     |                     |                    |      |        |       |   |           | <i>persulcatu</i>    |               |  |
|             |                     |                     |                    |      |        |       |   |           | <i>s</i> , <i>I.</i> |               |  |
|             |                     |                     |                    |      |        |       |   |           | <i>scapularis</i>    |               |  |
|             |                     |                     |                    |      |        |       |   |           | (Tokarz et           |               |  |
|             |                     |                     |                    |      |        |       |   |           | al., 2014;           |               |  |
|             |                     |                     |                    |      |        |       |   |           | Zhao et al.,         |               |  |
|             |                     |                     |                    |      |        |       |   |           | 2021)                |               |  |
| Midway      | <i>Midway</i>       | <i>Nyavirus</i>     | <i>Nyamivirid</i>  | ssRN | NC_01  | Com   | ? | 1982      | <i>Ornithodor</i>    | Central       |  |
| virus       | <i>nyavirus</i>     |                     | <i>ae</i>          | A(-) | 2702   | plete |   | (Takah    | <i>os</i> spp. (Shi  | Pacific,      |  |
|             |                     |                     |                    |      |        | geno  |   | ashi et   | et al.,              | Japan (Shi et |  |
|             |                     |                     |                    |      |        | me    |   | al.,      | 2018)                | al., 2018)    |  |
|             |                     |                     |                    |      |        |       |   | 1982)     |                      |               |  |
| Nyamanini   | <i>Nyamanini</i>    | <i>Nyavirus</i>     | <i>Nyamivirid</i>  | ssRN | NC_01  | Com   | ? | 1966      | <i>A.</i>            | Egypt, India, |  |
| virus       | <i>nyavirus</i>     |                     | <i>ae</i>          | A(-) | 2703   | plete |   | (Taylor   | <i>arboreris</i> ,   | Nigeria,      |  |
|             |                     |                     |                    |      |        | geno  |   | et al.,   | <i>A.</i>            | South Africa, |  |
|             |                     |                     |                    |      |        | me    |   | 1966)     | <i>walkerae</i>      | Thailand (Shi |  |
|             |                     |                     |                    |      |        |       |   |           | (Shi et al.,         | et al., 2018) |  |
|             |                     |                     |                    |      |        |       |   |           | 2018)                |               |  |
| Sierra      | <i>Sierra</i>       | <i>Nyavirus</i>     | <i>Nyamivirid</i>  | ssRN | NC_02  | Com   | ? | 2014      | <i>O.</i>            | USA (Rogers   |  |
| Nevada      | <i>Nevada</i>       |                     | <i>ae</i>          | A(-) | 4376   | plete |   | (Roger    | <i>coriaceus</i>     | et al., 2014) |  |
| virus       | <i>nyavirus</i>     |                     |                    |      |        | geno  |   | s et al., | (Rogers et           |               |  |
|             |                     |                     |                    |      |        | me    |   | 2014)     | al., 2014)           |               |  |
| Johnston    | <i>Johnston</i>     | <i>Quarantjavir</i> | <i>Orthomyxo</i>   | ssRN | NC_05  | Com   | ? | 2009      | <i>O. capensis</i>   | Australia,    |  |
| Atoll virus | <i>Atoll</i>        | <i>us</i>           | <i>viridae</i>     | A(-) | 2925,  | plete |   | (Presti   | (Shi et al.,         | Central       |  |
|             | <i>quarantjavir</i> |                     |                    |      | NC_05  | geno  |   | et al.,   | 2018)                | Pacific, New  |  |
|             | <i>us</i>           |                     |                    |      | 2926,  | me    |   | 2009)     |                      | Zealand and   |  |
|             |                     |                     |                    |      | NC_05  |       |   |           |                      | Hawaii (Shi   |  |
|             |                     |                     |                    |      | 2927,  |       |   |           |                      | et al., 2018) |  |
|             |                     |                     |                    |      | NC_05  |       |   |           |                      |               |  |
|             |                     |                     |                    |      | 2928,  |       |   |           |                      |               |  |
|             |                     |                     |                    |      | NC_05  |       |   |           |                      |               |  |

|                          |                                |                      |                         |           |                                                                        |                 |   |                              |                                                       |                                                                                            |  |
|--------------------------|--------------------------------|----------------------|-------------------------|-----------|------------------------------------------------------------------------|-----------------|---|------------------------------|-------------------------------------------------------|--------------------------------------------------------------------------------------------|--|
|                          |                                |                      |                         |           | 2929,                                                                  |                 |   |                              |                                                       |                                                                                            |  |
|                          |                                |                      |                         |           | NC_05                                                                  |                 |   |                              |                                                       |                                                                                            |  |
|                          |                                |                      |                         |           | 2930,                                                                  |                 |   |                              |                                                       |                                                                                            |  |
|                          |                                |                      |                         |           | NC_05                                                                  |                 |   |                              |                                                       |                                                                                            |  |
|                          |                                |                      |                         |           | 2931,                                                                  |                 |   |                              |                                                       |                                                                                            |  |
|                          |                                |                      |                         |           | FJ8616                                                                 |                 |   |                              |                                                       |                                                                                            |  |
|                          |                                |                      |                         |           | 96,                                                                    |                 |   |                              |                                                       |                                                                                            |  |
|                          |                                |                      |                         |           | FJ8616                                                                 |                 |   |                              |                                                       |                                                                                            |  |
|                          |                                |                      |                         |           | 97                                                                     |                 |   |                              |                                                       |                                                                                            |  |
| Quaranfil virus          | <i>Quaranfil quaranjavirus</i> | <i>Quaranjavirus</i> | <i>Orthomyxoviridae</i> | ssRN A(-) | NC_03 8817, NC_03 8818, NC_03 8819, NC_03 8820, NC_03 8821, NC_03 8822 | Complete genome | Y | 1966 (Mourya et al., 2019)   | A. <i>arboreus</i> (Shi et al., 2018)                 | Afghanistan, Egypt, Iraq, Kuwait, Nigeria, South Africa, Yemen and Iran (Shi et al., 2018) |  |
| Granville quaranjavirus* | <i>Granville quaranjavirus</i> | <i>Quaranjavirus</i> | <i>Orthomyxoviridae</i> | ssRN A(-) | MZ502 307, MZ502 306, MZ502 305, MZ502 304, MZ502 308                  | Partial genome  | ? | 2021 (Sameroff et al., 2021) | Am. <i>dissimile</i> ( <i>Sameroff et al., 2021</i> ) | Trinidad and Tobago (Sameroff et al., 2021)                                                |  |
| Dhori virus              | <i>Dhori thogotovirus</i>      | <i>Thogotovirus</i>  | <i>Orthomyxoviridae</i> | ssRN A(-) | NC_03 4254, NC_03 4255, NC_03 4256, NC_03 4261, NC_03 4262, NC_03 4263 | Complete genome | Y | 1973 (Kosoy et al., 2015)    | <i>Hyalomma</i> spp. (Shi et al., 2018)               | China, Egypt, India, Kyrgyzstan, Russia (Shi et al., 2018)                                 |  |
| Jos virus                | <i>Thogoto thogotovirus</i>    | <i>Thogotovirus</i>  | <i>Orthomyxoviridae</i> | ssRN A(-) | HM627 170, HM627                                                       | Complete genome | ? | 1974 (Lee et al., 2018)      | <i>Amblyomma</i> spp., <i>Rhipicephala</i>            | Central Africa Republic,                                                                   |  |

|               |                                   |                        |                         |          |                                                                  |                 |   |                              |                                                                                                                      |      |                                                                                                  |
|---------------|-----------------------------------|------------------------|-------------------------|----------|------------------------------------------------------------------|-----------------|---|------------------------------|----------------------------------------------------------------------------------------------------------------------|------|--------------------------------------------------------------------------------------------------|
|               |                                   |                        |                         |          | 171,                                                             | geno            |   | al.,                         | <i>lus</i>                                                                                                           | spp. | Guinea, Côte                                                                                     |
|               |                                   |                        |                         |          | HM627                                                            | me              |   | 1974)                        | (Shi et al.,                                                                                                         |      | d'Ivoire,                                                                                        |
|               |                                   |                        |                         |          | 172,                                                             |                 |   |                              | 2018)                                                                                                                |      | Nigeria,                                                                                         |
|               |                                   |                        |                         |          | HM627                                                            |                 |   |                              |                                                                                                                      |      | Senegal (Shi                                                                                     |
|               |                                   |                        |                         |          | 173,                                                             |                 |   |                              |                                                                                                                      |      | et al., 2018)                                                                                    |
|               |                                   |                        |                         |          | HM627                                                            |                 |   |                              |                                                                                                                      |      |                                                                                                  |
|               |                                   |                        |                         |          | 174,                                                             |                 |   |                              |                                                                                                                      |      |                                                                                                  |
|               |                                   |                        |                         |          | HM627                                                            |                 |   |                              |                                                                                                                      |      |                                                                                                  |
|               |                                   |                        |                         |          | 175                                                              |                 |   |                              |                                                                                                                      |      |                                                                                                  |
| Thogoto virus | <i>Thogoto thogotovirus</i>       | <i>Thogotovirus</i>    | <i>Orthomyxoviridae</i> | ssRNA(-) | NC_006495, NC_006496, NC_006504, NC_006506, NC_006507, NC_006508 | Complete genome | Y | 1965 (Haig et al., 1965)     | <i>Am. Variiegatus</i> , <i>Boophilus spp.</i> , <i>Hyalomma spp.</i> , <i>Rhipicephalus</i> spp. (Shi et al., 2018) |      | Central and East Africa, Southern Europe, Southern Portugal (Shi et al., 2018)                   |
| Ngari virus   | <i>Bunyamwera orthobunyavirus</i> | <i>Orthobunyavirus</i> | <i>Peribunyaviridae</i> | ssRNA(-) | KC608152, KC608153, KC608154                                     | Complete genome | Y | 1996 (Grosseth et al., 2012) | <i>Am. variiegatus</i> , <i>R. pulchellus</i> (Grosseth et al., 2012)                                                |      | Guinea, Kenya, Mauritania, Senegal, Somalia, Sudan (Grosseth et al., 2012; Makenov et al., 2021) |
| Matruh virus  | <i>Matruh orthobunyavirus</i>     | <i>Orthobunyavirus</i> | <i>Peribunyaviridae</i> | ssRNA(-) | KP792693, KP792692, KP792691                                     | Complete genome | ? | 1973 (Balducci et al., 1973) | <i>Hy. Marginatum</i> (Balducci et al., 1973)                                                                        |      | Italy (Balducci et al., 1973)                                                                    |
| Bahig virus   | <i>Tete orthobunyavirus</i>       | <i>Orthobunyavirus</i> | <i>Peribunyaviridae</i> | ssRNA(-) | KP792654, KP792653, KP792652                                     | Complete genome | ? | 1973 (Balducci et al., 1973) | <i>Hy. Marginatum</i> (Balducci et al., 1973)                                                                        |      | Italy (Balducci et al., 1973)                                                                    |
| Bhanja virus  | <i>Bhanja bandavirus</i>          | <i>Bandavirus</i>      | <i>Phenuiviridae</i>    | ssRNA(-) | NC_027140, NC_02                                                 | Complete genome | Y | 1977 (Matsuno et al., 2018)  | <i>H. intermedia</i> , <i>R.</i>                                                                                     |      | Africa, Asia, Southern Europe, USA                                                               |



|                                                   |                                 |                   |                       |           |       |       |       |         |           |                       |               |
|---------------------------------------------------|---------------------------------|-------------------|-----------------------|-----------|-------|-------|-------|---------|-----------|-----------------------|---------------|
|                                                   |                                 |                   |                       |           |       | 7141, | geno  | al.,    | Hirjan    | <i>decoloratu</i>     | (Shi et al.,  |
|                                                   |                                 |                   |                       |           |       | NC_02 | me    | 2013)   | et al.,   | <i>s</i> (Matsuno     | 2018)         |
|                                                   |                                 |                   |                       |           |       | 7142  |       |         | 1977)     | et al.,               |               |
|                                                   |                                 |                   |                       |           |       |       |       |         |           | 2013)                 |               |
| Heartland virus                                   | <i>Heartland bandavirus</i>     | <i>Bandavirus</i> | <i>Phenuivirid ae</i> | ssRN A(-) | NC_02 | 4494, | Com   | Y       | 2012      | <i>Am.</i>            | USA           |
|                                                   |                                 |                   |                       |           |       | NC_02 | plete | (McM    | (McM      | <i>americanu</i>      | (Mansfield    |
|                                                   |                                 |                   |                       |           |       | 4495, | geno  | ullan   | ullan     | <i>m</i>              | et al., 2017) |
|                                                   |                                 |                   |                       |           |       | NC_02 | me    | et al., | et al.,   | <i>(Mansfield</i>     |               |
|                                                   |                                 |                   |                       |           |       | 4496  |       | 2012)   | 2012)     | <i>et al.,</i>        |               |
|                                                   |                                 |                   |                       |           |       |       |       |         |           | 2017)                 |               |
| Hunter Island virus                               | <i>Hunter Island bandavirus</i> | <i>Bandavirus</i> | <i>Phenuivirid ae</i> | ssRN A(-) | NC_02 | 7715, | Com   | ?       | 2014      | <i>l.</i>             | Australia     |
|                                                   |                                 |                   |                       |           |       | NC_02 | plete |         | (Wang     | <i>eudyptidis</i>     | (Shi et al.,  |
|                                                   |                                 |                   |                       |           |       | 7716, | geno  |         | et al.,   | (Shi et al.,          | 2018)         |
|                                                   |                                 |                   |                       |           |       | NC_02 | me    |         | 2014)     | 2018)                 |               |
|                                                   |                                 |                   |                       |           |       | 7717  |       |         |           |                       |               |
| lone star virus                                   | <i>Lone star bandavirus</i>     | <i>Bandavirus</i> | <i>Phenuivirid ae</i> | ssRN A(-) | NC_02 | 1242, | Com   | ?       | 1969      | <i>Am.</i>            | USA (Shi et   |
|                                                   |                                 |                   |                       |           |       | NC_02 | plete |         | (Koker    | <i>Americanu</i>      | al., 2018)    |
|                                                   |                                 |                   |                       |           |       | 1243, | geno  |         | not et    | <i>m</i> (Shi et      |               |
|                                                   |                                 |                   |                       |           |       | NC_02 | me    |         | al.,      | al., 2018)            |               |
|                                                   |                                 |                   |                       |           |       | 1244  |       |         | 1969)     |                       |               |
| Severe fever with thrombocytopenia syndrome virus | <i>Dabie bandavirus</i>         | <i>Bandavirus</i> | <i>Phenuivirid ae</i> | ssRN A(-) | NC_04 | 3450, | Com   | Y       | 2011      | <i>Dermacent</i>      | East Asia,    |
|                                                   |                                 |                   |                       |           |       | NC_04 | plete | et al., | (Yu et    | <i>or spp.,</i>       | North         |
|                                                   |                                 |                   |                       |           |       | 3451, | geno  | 2011)   | al.,      | <i>Haemaphy</i>       | America       |
|                                                   |                                 |                   |                       |           |       | NC_04 | me    |         | 2011)     | <i>salis spp., l.</i> | (Mansfield    |
|                                                   |                                 |                   |                       |           |       | 3452  |       |         |           | <i>persulcatu</i>     | et al., 2017; |
|                                                   |                                 |                   |                       |           |       |       |       |         |           | <i>s,</i>             | Zhao et al.,  |
|                                                   |                                 |                   |                       |           |       |       |       |         |           | <i>Rhipicepha</i>     | 2021)         |
|                                                   |                                 |                   |                       |           |       |       |       |         |           | <i>lus spp.</i>       |               |
|                                                   |                                 |                   |                       |           |       |       |       |         |           | <i>(Mansfield</i>     |               |
|                                                   |                                 |                   |                       |           |       |       |       |         |           | <i>et al.,</i>        |               |
|                                                   |                                 |                   |                       |           |       |       |       |         |           | 2017; Zhao            |               |
|                                                   |                                 |                   |                       |           |       |       |       |         |           | <i>et al.,</i>        |               |
|                                                   |                                 |                   |                       |           |       |       |       |         |           | 2021)                 |               |
| Norway phlebovirus 1                              | <i>Norway ixovirus</i>          | <i>Ixovirus</i>   | <i>Phenuivirid ae</i> | ssRN A(-) | NC_05 | 5433, | Com   | ?       | 2017      | <i>l. ricinus</i>     | Norway        |
|                                                   |                                 |                   |                       |           |       | NC_05 | plete |         | (Petter   | (Pettersso            | (Pettersson   |
|                                                   |                                 |                   |                       |           |       | 5434  | geno  |         | sson et   | n et al.,             | et al., 2017) |
|                                                   |                                 |                   |                       |           |       |       | me    |         | al.,      | 2017)                 |               |
|                                                   |                                 |                   |                       |           |       |       |       |         |           | 2017)                 |               |
| Blacklegged tick phlebovirus 3                    | <i>Scapularis ixovirus</i>      | <i>Ixovirus</i>   | <i>Phenuivirid ae</i> | ssRN A(-) | NC_05 | 5431, | Com   | ?       | 2018      | <i>l.</i>             | USA (Tokarz   |
|                                                   |                                 |                   |                       |           |       | NC_05 | plete |         | (Tokar    | <i>scapularis</i>     | et al., 2018) |
|                                                   |                                 |                   |                       |           |       | 5432  | geno  |         | z et al., | <i>(Tokarz et</i>     |               |
|                                                   |                                 |                   |                       |           |       |       | me    |         | 2018)     | <i>al., 2018)</i>     |               |
| Laurel Lake virus                                 | <i>Laurel Lake laulavirus</i>   | <i>Laulavirus</i> | <i>Phenuivirid ae</i> | ssRN A(-) | NC_04 | 3679, | Com   | ?       | 2018      | <i>l.</i>             | USA (Tokarz   |
|                                                   |                                 |                   |                       |           |       |       | plete |         | (Tokar    | <i>scapularis</i>     | et al., 2018) |

|              |                    |                  |                    |      |       |       |   |         |                      |                |       |
|--------------|--------------------|------------------|--------------------|------|-------|-------|---|---------|----------------------|----------------|-------|
|              |                    |                  |                    |      | NC_04 | geno  |   |         | z et al.,            | (Tokarz et     |       |
|              |                    |                  |                    |      | 3680, | me    |   |         | 2018)                | al., 2018)     |       |
|              |                    |                  |                    |      | NC_04 |       |   |         |                      |                |       |
|              |                    |                  |                    |      | 3681  |       |   |         |                      |                |       |
| Dabieshan    | <i>Dabieshan</i>   | <i>Uukuvirus</i> | <i>Phenuivirid</i> | ssRN | MW72  | Com   | ? | 2015    | <i>H.</i>            | <i>China</i>   | (Wang |
| tick virus   | <i>uukuvirus</i>   |                  | <i>ae</i>          | A(-) | 1887, | plete |   | (Li et  | <i>longicornis</i>   | et al., 2021;  |       |
|              |                    |                  |                    |      | MW72  | geno  |   | al.,    | , <i>I.</i>          | Zhao et al.,   |       |
|              |                    |                  |                    |      | 1893  | me    |   | 2015)   | <i>persulcatu</i>    | 2021)          |       |
|              |                    |                  |                    |      |       |       |   |         | <i>s,</i>            |                |       |
|              |                    |                  |                    |      |       |       |   |         | <i>R.</i>            |                |       |
|              |                    |                  |                    |      |       |       |   |         | <i>microplus</i>     |                |       |
|              |                    |                  |                    |      |       |       |   |         | (Wang et             |                |       |
|              |                    |                  |                    |      |       |       |   |         | al., 2021;           |                |       |
|              |                    |                  |                    |      |       |       |   |         | Zhao et al.,         |                |       |
|              |                    |                  |                    |      |       |       |   |         | 2021)                |                |       |
| Kaisodi      | <i>Kaisodi</i>     | <i>Uukuvirus</i> | <i>Phenuivirid</i> | ssRN | NC_04 | Com   | ? | 1966    | <i>H.</i>            | South India    |       |
| virus        | <i>uukuvirus</i>   |                  | <i>ae</i>          | A(-) | 0492, | plete |   | (Bhatt  | <i>spinigera</i>     | (Shi et al.,   |       |
|              |                    |                  |                    |      | NC_04 | geno  |   | et al., | (Shi et al.,         | 2018)          |       |
|              |                    |                  |                    |      | 0493, | me    |   | 1966)   | 2018)                |                |       |
|              |                    |                  |                    |      | NC_04 |       |   |         |                      |                |       |
|              |                    |                  |                    |      | 0494  |       |   |         |                      |                |       |
| Lihan        | tick               | <i>Lihan</i>     | <i>Uukuvirus</i>   | ssRN | NC_05 | Com   | ? | 2015    | <i>D. nitens,</i>    | Brazil, China, |       |
| virus        | <i>uukuvirus</i>   |                  | <i>ae</i>          | A(-) | 5423, | plete |   | (Li et  | <i>Hy.</i>           | USA,           |       |
|              |                    |                  |                    |      | NC_05 | geno  |   | al.,    | <i>marginatu</i>     | Guadeloupe     |       |
|              |                    |                  |                    |      | 5424  | me    |   | 2015)   | <i>m,</i>            | , Thailand,    |       |
|              |                    |                  |                    |      |       |       |   |         | <i>R.</i>            | Turkey,        |       |
|              |                    |                  |                    |      |       |       |   |         | <i>microplus,</i>    |                |       |
|              |                    |                  |                    |      |       |       |   |         | <i>R.</i>            | Trinidad.      |       |
|              |                    |                  |                    |      |       |       |   |         | <i>sanguineus</i>    | Tobago         |       |
|              |                    |                  |                    |      |       |       |   |         | (Temmam              | (Temmam et     |       |
|              |                    |                  |                    |      |       |       |   |         | et al.,              | al., 2019;     |       |
|              |                    |                  |                    |      |       |       |   |         | 2019)                | Gondard et     |       |
|              |                    |                  |                    |      |       |       |   |         |                      | al., 2020)     |       |
| Silverwater  | <i>Silverwater</i> | <i>Uukuvirus</i> | <i>Phenuivirid</i> | ssRN | NC_05 | Com   | ? | 1971    | <i>H.</i>            | Canada, USA    |       |
| virus        | <i>uukuvirus</i>   |                  | <i>ae</i>          | A(-) | 5369, | plete |   | (Hoff   | <i>leporispalu</i>   | (Shi et al.,   |       |
|              |                    |                  |                    |      | NC_05 | geno  |   | et al., | <i>stris</i> (Shi et | 2018)          |       |
|              |                    |                  |                    |      | 5370, | me    |   | 1971)   | al., 2018)           |                |       |
|              |                    |                  |                    |      | NC_05 |       |   |         |                      |                |       |
|              |                    |                  |                    |      | 5371  |       |   |         |                      |                |       |
| Tacheng      | <i>Tacheng</i>     | <i>Uukuvirus</i> | <i>Phenuivirid</i> | ssRN | NC_05 | Com   | Y | 2015    | <i>D.</i>            | China,         |       |
| tick virus 2 | <i>uukuvirus</i>   |                  | <i>ae</i>          | A(-) | 5425, | plete |   | (Dong   | <i>marginatu</i>     | Kazakhstan,    |       |
|              |                    |                  |                    |      | NC_05 | geno  |   | et al., | <i>s,</i>            | Romania,       |       |
|              |                    |                  |                    |      | 5426  | me    |   | 2021)   | <i>D.</i>            | Tailand,       |       |
|              |                    |                  |                    |      |       |       |   |         | <i>reticulatus,</i>  |                |       |
|              |                    |                  |                    |      |       |       |   |         | <i>R.</i>            | Turkey (Li et  |       |
|              |                    |                  |                    |      |       |       |   |         | <i>sanguineus</i>    | al., 2015;     |       |
|              |                    |                  |                    |      |       |       |   |         | , <i>H.</i>          | Brinkmann      |       |
|              |                    |                  |                    |      |       |       |   |         | <i>marginatu</i>     | et al., 2018;  |       |
|              |                    |                  |                    |      |       |       |   |         | <i>m</i> (Li et al., | Temmam et      |       |

|                       |                                      |                           |                       |           |                                    |                 |   |      |                         |                                                                                                                                 |                                                   |
|-----------------------|--------------------------------------|---------------------------|-----------------------|-----------|------------------------------------|-----------------|---|------|-------------------------|---------------------------------------------------------------------------------------------------------------------------------|---------------------------------------------------|
|                       |                                      |                           |                       |           |                                    |                 |   |      | 2015;                   | al.,                                                                                                                            | 2019;                                             |
|                       |                                      |                           |                       |           |                                    |                 |   |      | Brinkmann               | Bratuleanu                                                                                                                      |                                                   |
|                       |                                      |                           |                       |           |                                    |                 |   |      | et al.,                 | et al.,                                                                                                                         | 2021)                                             |
|                       |                                      |                           |                       |           |                                    |                 |   |      | 2018;                   |                                                                                                                                 |                                                   |
|                       |                                      |                           |                       |           |                                    |                 |   |      | Bratuleanu              |                                                                                                                                 |                                                   |
|                       |                                      |                           |                       |           |                                    |                 |   |      | et al.,                 |                                                                                                                                 |                                                   |
|                       |                                      |                           |                       |           |                                    |                 |   |      | 2021)                   |                                                                                                                                 |                                                   |
| Uukuniemi virus       | <i>Uukuniemi uukuvirus</i>           | <i>Uukuvirus</i>          | <i>Phenuivirid ae</i> | ssRN A(-) | NC_00 5214, NC_00 5220, NC_00 5221 | Complete genome | ? | 2013 | (Palacios et al., 2013) | <i>I. ricinus</i> , <i>I. uriae</i> (Matsuno et al., 2015)                                                                      | Czech Republic, Sweden, UK (Matsuno et al., 2015) |
| Yongjia tick virus 1  | <i>Yongjia uukuvirus</i>             | <i>Uukuvirus</i>          | <i>Phenuivirid ae</i> | ssRN A(-) | NC_05 5427, NC_05 5428             | Complete genome | ? | 2015 | (Li et al., 2015)       | <i>H. hystricis</i> (Li et al., 2015)                                                                                           | China (Li et al., 2015)                           |
| Blanchseco virus      | <i>Blanchseco alpharicinrhavirus</i> | <i>Alpharicinrhavirus</i> | <i>Rhabdovirid ae</i> | ssRN A(-) | MN02 5503                          | Complete genome | ? | 2019 | (Sameroff et al., 2019) | <i>A. ovale</i> (Sameroff et al., 2019)                                                                                         | Trinidad and Tobago (Sameroff et al., 2019)       |
| Bole tick virus 2     | <i>Bole alpharicinrhavirus</i>       | <i>Alpharicinrhavirus</i> | <i>Rhabdovirid ae</i> | ssRN A(-) | NC_03 1079                         | Complete genome | ? | 2015 | (Li et al., 2015)       | <i>Hy. Asiaticum</i> (Li et al., 2015)                                                                                          | China (Li et al., 2015)                           |
| Wuhan tick virus 1    | <i>Wuhan alpharicinrhavirus</i>      | <i>Alpharicinrhavirus</i> | <i>Rhabdovirid ae</i> | ssRN A(-) | NC_03 1304                         | Complete genome | ? | 2015 | (Li et al., 2015)       | <i>D. marginatus</i> , <i>R. microplus</i> , <i>R. annulatus</i> , <i>H. longicornis</i> (Temmam et al., 2019; Xu et al., 2021) | China, Turkey (Xu et al., 2021)                   |
| New Kent County virus | <i>Kent ephemerovirus</i>            | <i>Ephemerovirus</i>      | <i>Rhabdovirid ae</i> | ssRN A(-) | MF615 270                          | Complete genome | ? | 2018 | (Tokarz et al., 2018)   | <i>I. scapularis</i> (Tokarz et al., 2018)                                                                                      | USA (Tokarz et al., 2018)                         |
| Barur virus           | <i>Barur ledantevirus</i>            | <i>Ledantevirus</i>       | <i>Rhabdovirid ae</i> | ssRN A(-) | NC_03 4535                         | Complete genome | ? | 1981 | (Butenko et al., 2018)  | <i>Hy. Intermedia</i> (Shi et al., 2018)                                                                                        | India, Kenya, Somalia (Shi et al., 2018)          |

|                              |                                 |                      |                      |           |                      |                 |                       |      |                                                                      |                                                |
|------------------------------|---------------------------------|----------------------|----------------------|-----------|----------------------|-----------------|-----------------------|------|----------------------------------------------------------------------|------------------------------------------------|
|                              |                                 |                      |                      |           |                      |                 |                       |      | al.,<br>1981)                                                        |                                                |
| Kolente virus                | <i>Kolente ledantevirus</i>     | <i>Ledantevirus</i>  | <i>Rhabdoviridae</i> | ssRN A(-) | NC_02 5342           | Complete genome | ?                     | 2013 | <i>Am. Variegatum</i> (Shi et al., 2018)                             | Guinea (Shi et al., 2018)                      |
| Yongjia tick virus 2         | <i>Yongjia ledantevirus</i>     | <i>Ledantevirus</i>  | <i>Rhabdoviridae</i> | ssRN A(-) | NC_03 1305           | Complete genome | ?                     | 2015 | <i>H. hystricis</i> (Shi et al., 2018)                               | China (Shi et al., 2018)                       |
| Connecticut virus            | <i>Connecticut sawgrhavirus</i> | <i>Sawgrhavirus</i>  | <i>Rhabdoviridae</i> | ssRN A(-) | KM205 020            | Complete genome | ?                     | 1978 | <i>I. dentatus</i> (Shi et al., 2018)                                | USA (Shi et al., 2018)                         |
| Long Island tick rhabdovirus | <i>Island sawgrhavirus</i>      | <i>Sawgrhavirus</i>  | <i>Rhabdoviridae</i> | ssRN A(-) | NC_02 5340           | Complete genome | ?                     | 2014 | <i>Am. americanum</i> (Tokarz et al., 2014)                          | USA (Tokarz et al., 2014)                      |
| New Minto virus              | <i>Minto sawgrhavirus</i>       | <i>Sawgrhavirus</i>  | <i>Rhabdoviridae</i> | ssRN A(-) | NC_05 5457           | Complete genome | ?                     | 1970 | <i>H. leporispalustris</i> (Shi et al., 2018)                        | USA (Shi et al., 2018)                         |
| Sawgrass virus               | <i>Sawgrass sawgrhavirus</i>    | <i>Sawgrhavirus</i>  | <i>Rhabdoviridae</i> | ssRN A(-) | NC_05 5461           | Complete genome | ?                     | 1970 | <i>D. variabilis</i> , <i>H. leporispalustris</i> (Shi et al., 2018) | USA (Shi et al., 2018)                         |
| Isfahan virus                | <i>Isfahan vesiculovirus</i>    | <i>Vesiculovirus</i> | <i>Rhabdoviridae</i> | ssRN A(-) | NC_02 0806           | Complete genome | ?                     | 1977 | <i>Hy. Asiaticum</i> (Shi et al., 2018)                              | Parts of Asia, Turkmenistan (Shi et al., 2018) |
| Zahedan rhabdovirus          | <i>Zahedan zarhavirus</i>       | <i>Zarhavirus</i>    | <i>Rhabdoviridae</i> | ssRN A(-) | NC_04 0664           | Complete genome | ?                     | 2015 | <i>Hy. Anatolicum</i> (Shi et al., 2018)                             | Iran (Shi et al., 2018)                        |
| Beiji nairovirus             | Unclassified                    | <i>Nairovirus</i>    | <i>Nairoviridae</i>  | ssRN A(-) | MW31 5106, MW31 5112 | Partial genome  | Y (Wang et al., 2021) | 2019 | <i>I. crenulatus</i> , <i>I. persulcatus</i> (Wang et al., 2021)     | China (Wang et al., 2021)                      |
| Nayun tick nairovirus        | Unclassified                    | <i>Nairovirus</i>    | <i>Nairoviridae</i>  | ssRN A(-) | MW56 1151,           | Partial         | ?                     | 2015 | <i>R. sanguineus</i> (Xia et al., 2018)                              | China, Romania                                 |

|                             |              |                        |                     |              |                                                                                                                                                                       |                           |   |                                      |                                                                 |                                                      |
|-----------------------------|--------------|------------------------|---------------------|--------------|-----------------------------------------------------------------------------------------------------------------------------------------------------------------------|---------------------------|---|--------------------------------------|-----------------------------------------------------------------|------------------------------------------------------|
|                             |              |                        |                     |              | KP141<br>756,<br>KP141<br>755                                                                                                                                         | geno<br>me                |   | al.,<br>2015)                        | (Xia et al.,<br>2015;<br>Bratuleanu<br>et al.,<br>2021)         | (Xia et al.,<br>2015;<br>Bratuleanu<br>et al., 2021) |
| Norway<br>nairovirus 1      | Unclassified | <i>Nairovirus</i>      | <i>Nairoviridae</i> | ssRN<br>A(-) | MF141<br>045,<br>MF141<br>044                                                                                                                                         | Parti<br>al<br>geno<br>me | ? | 2017<br>(Pettersson et al.,<br>2017) | <i>I. ricinus</i><br>(Pettersson et al.,<br>2017)               | Northern<br>Europe<br>(Pettersson et al., 2017)      |
| Paramushir<br>virus         | Unclassified | <i>Nairovirus</i>      | <i>Nairoviridae</i> | ssRN<br>A(-) | MH638<br>289,<br>MH124<br>638,<br>MH124<br>637,<br>MH124<br>636,<br>MH124<br>635,<br>MH124<br>634,<br>KF8016<br>57,<br>KP792<br>719,<br>KP792<br>718,<br>KP792<br>717 | Parti<br>al<br>geno<br>me | ? | 1976<br>(L'vov et al.,<br>1976)      | <i>I. signatus</i> ,<br><i>I. uriae</i><br>(L'vov et al., 1976) | Russia<br>(Safonova et al., 2015)                    |
| Rondonia<br>orthonairovirus | Unclassified | <i>Orthonairovirus</i> | <i>Nairoviridae</i> | ssRN<br>A(-) | MN56<br>0621,<br>MN56<br>0622,<br>MN56<br>0623,<br>MN56<br>0624,<br>MN56<br>0625,<br>MN56<br>0626,<br>MN56<br>0627,<br>MN56<br>0628,                                  | Parti<br>al<br>geno<br>me | ? | 2019<br>(Blomstrom et al.,<br>2019)  | <i>Antricola</i><br>(Blomstrom et al.,<br>2019)                 | Brazil<br>(Blomstrom et al., 2019)                   |

|                      |              |                        |                         |          |                                                                                                                              |                 |                         |                              |                                                |                                     |  |
|----------------------|--------------|------------------------|-------------------------|----------|------------------------------------------------------------------------------------------------------------------------------|-----------------|-------------------------|------------------------------|------------------------------------------------|-------------------------------------|--|
|                      |              |                        |                         |          | MN56                                                                                                                         |                 |                         |                              |                                                |                                     |  |
|                      |              |                        |                         |          | 0629                                                                                                                         |                 |                         |                              |                                                |                                     |  |
| Songling virus       | Unclassified | <i>Orthonairovirus</i> | <i>Nairoviridae</i>     | ssRNA(-) | MT328<br>780,<br>MT328<br>779,<br>MT328<br>778                                                                               | Partial genome  | Y (Ma et al., 2021)     | 2021 (Ma et al., 2021)       | <i>H. longicornis</i> (Ma et al., 2021)        | China (Ma et al., 2021)             |  |
| Yezo virus           | Unclassified | <i>Orthonairovirus</i> | <i>Nairoviridae</i>     | ssRNA(-) | LC6213<br>60,<br>LC6213<br>59,<br>LC6213<br>58                                                                               | Partial genome  | Y (Kodama et al., 2021) | 2021 (Kodama et al., 2021)   | <i>H. megaspinosus</i> (Kodama et al., 2021)   | Japan (Kodama et al., 2021)         |  |
| Zambezi tick virus 1 | Unclassified | <i>Quarjavirus</i>     | <i>Orthomyxoviridae</i> | ssRNA(-) | MH267<br>793                                                                                                                 | Partial genome  | ?                       | 2018 (Cholleti et al., 2018) | <i>Rhipicephalus</i> (Cholleti et al., 2018)   | Mozambique (Cholleti et al., 2018)  |  |
| Aransas Bay virus    | Unclassified | <i>Thogotovirus</i>    | <i>Orthomyxoviridae</i> | ssRNA(-) | KC506<br>162,<br>KC506<br>163,<br>KC506<br>164,<br>KC506<br>165,<br>KC506<br>166,<br>KC506<br>167                            | Partial genome  | ?                       | 1979 (Yunker et al., 1979)   | <i>Ornithodoros</i> spp. (Briese et al., 2014) | North America (Briese et al., 2014) |  |
| Bourbon virus        | Unclassified | <i>Thogotovirus</i>    | <i>Orthomyxoviridae</i> | ssRNA(-) | KU708<br>253,<br>KU708<br>254,<br>KU708<br>255,<br>MH880<br>287,<br>MH880<br>288,<br>MH880<br>289,<br>MH880<br>290,<br>MH880 | Complete genome | Y (Kosoy et al., 2015)  | 2015 (Kosoy et al., 2015)    | <i>Americanum</i> (Savage et al., 2017)        | USA (Kosoy et al., 2015)            |  |

|                               |              |                     |                         |          |                                                            |                 |   |                             |                                               |                                 |
|-------------------------------|--------------|---------------------|-------------------------|----------|------------------------------------------------------------|-----------------|---|-----------------------------|-----------------------------------------------|---------------------------------|
|                               |              |                     |                         |          | 291,<br>MH880                                              |                 |   |                             |                                               |                                 |
|                               |              |                     |                         |          | 292                                                        |                 |   |                             |                                               |                                 |
| Oz virus                      | Unclassified | <i>Thogotovirus</i> | <i>Orthomyxoviridae</i> | ssRNA(-) | NC_04730, NC_04731, NC_04732, NC_04733, NC_04734, NC_04735 | Complete genome | ? | 2018 (Ejiri et al., 2018)   | <i>Am. testudinarius</i> (Ejiri et al., 2018) | Japan (Ejiri et al., 2018)      |
| Thailand tick thogotovirus    | Unclassified | <i>Thogotovirus</i> | <i>Orthomyxoviridae</i> | ssRNA(-) | MN095539, MN095540, MN095541, MN095542, MN095543, MN095544 | Complete genome | ? | 2019 (Temmam et al., 2019)  | <i>R. microplus</i> (Temmam et al., 2019)     | Tailand (Temmam et al., 2019)   |
| Upolu virus                   | Unclassified | <i>Thogotovirus</i> | <i>Orthomyxoviridae</i> | ssRNA(-) | KC506156, KC506157, KC506158, KC506159, KC506160, KC506161 | Complete genome | ? | 1968 (Doherly et al., 1968) | <i>O. capensis</i> (Briese et al., 2014)      | Australia (Briese et al., 2014) |
| American dog tick phlebovirus | Unclassified | <i>Phlebovirus</i>  | <i>Phenuiviridae</i>    | ssRNA(-) | KM048312, KM048311                                         | Complete genome | ? | 2014 (Tokarz et al., 2014)  | <i>D. variabilis</i> (Tokarz et al., 2014)    | USA (Tokarz et al., 2014)       |
| Blacklegged tick              | Unclassified | <i>Phlebovirus</i>  | <i>Phenuiviridae</i>    | ssRNA(-) | KX184200                                                   | Complete genome | ? | 2014 (Tokarz et al., 2014)  | <i>I. scapularis</i>                          | USA (Tokarz et al., 2014)       |

|                   |              |                    |                    |      |  |       |       |   |                      |                                 |
|-------------------|--------------|--------------------|--------------------|------|--|-------|-------|---|----------------------|---------------------------------|
| phlebovirus       |              |                    |                    |      |  | KX184 | geno  |   | z et al., (Tokarz et |                                 |
| 1                 |              |                    |                    |      |  | 201   | me    |   | 2014) al., 2014)     |                                 |
| Blacklegged tick  | Unclassified | <i>Phlebovirus</i> | <i>Phenuivirid</i> | ssRN |  | KM589 | Parti | ? | 2014                 | USA (Tokarz et al., 2014)       |
|                   |              |                    | <i>ae</i>          | A(-) |  | 357,  | al    |   | (Tokar               | <i>scapularis</i> et al., 2014) |
| phlebovirus       |              |                    |                    |      |  | KM589 | geno  |   | z et al., (Tokarz et |                                 |
| 2                 |              |                    |                    |      |  | 354   | me    |   | 2014) al., 2014)     |                                 |
| Bole tick virus 1 | Unclassified | <i>Phlebovirus</i> | <i>Phenuivirid</i> | ssRN |  | MZ244 | Parti | ? | 2015                 | China (Li et al., 2015)         |
|                   |              |                    | <i>ae</i>          | A(-) |  | 253,  | al    |   | (Li et               | <i>Asiaticum</i> al., 2015)     |
|                   |              |                    |                    |      |  | MZ244 | geno  |   | al., (Li et al.,     |                                 |
|                   |              |                    |                    |      |  | 252,  | me    |   | 2015) 2015)          |                                 |
|                   |              |                    |                    |      |  | KM817 |       |   |                      |                                 |
|                   |              |                    |                    |      |  | 731,  |       |   |                      |                                 |
|                   |              |                    |                    |      |  | MH916 |       |   |                      |                                 |
|                   |              |                    |                    |      |  | 622,  |       |   |                      |                                 |
|                   |              |                    |                    |      |  | MH916 |       |   |                      |                                 |
|                   |              |                    |                    |      |  | 621,  |       |   |                      |                                 |
|                   |              |                    |                    |      |  | MH916 |       |   |                      |                                 |
|                   |              |                    |                    |      |  | 620,  |       |   |                      |                                 |
|                   |              |                    |                    |      |  | MH916 |       |   |                      |                                 |
|                   |              |                    |                    |      |  | 619,  |       |   |                      |                                 |
|                   |              |                    |                    |      |  | MH688 |       |   |                      |                                 |
|                   |              |                    |                    |      |  | 504,  |       |   |                      |                                 |
|                   |              |                    |                    |      |  | MH836 |       |   |                      |                                 |
|                   |              |                    |                    |      |  | 620,  |       |   |                      |                                 |
|                   |              |                    |                    |      |  | MH688 |       |   |                      |                                 |
|                   |              |                    |                    |      |  | 505,  |       |   |                      |                                 |
|                   |              |                    |                    |      |  | MH688 |       |   |                      |                                 |
|                   |              |                    |                    |      |  | 503,  |       |   |                      |                                 |
|                   |              |                    |                    |      |  | MH688 |       |   |                      |                                 |
|                   |              |                    |                    |      |  | 501,  |       |   |                      |                                 |
|                   |              |                    |                    |      |  | MH688 |       |   |                      |                                 |
|                   |              |                    |                    |      |  | 578,  |       |   |                      |                                 |
|                   |              |                    |                    |      |  | MH688 |       |   |                      |                                 |
|                   |              |                    |                    |      |  | 577,  |       |   |                      |                                 |
|                   |              |                    |                    |      |  | MH688 |       |   |                      |                                 |
|                   |              |                    |                    |      |  | 576,  |       |   |                      |                                 |
|                   |              |                    |                    |      |  | MH688 |       |   |                      |                                 |
|                   |              |                    |                    |      |  | 575,  |       |   |                      |                                 |
|                   |              |                    |                    |      |  | MH688 |       |   |                      |                                 |
|                   |              |                    |                    |      |  | 574,  |       |   |                      |                                 |
|                   |              |                    |                    |      |  | MH688 |       |   |                      |                                 |
|                   |              |                    |                    |      |  | 573,  |       |   |                      |                                 |
|                   |              |                    |                    |      |  | MH688 |       |   |                      |                                 |
|                   |              |                    |                    |      |  | 572,  |       |   |                      |                                 |
|                   |              |                    |                    |      |  | MH688 |       |   |                      |                                 |
|                   |              |                    |                    |      |  | 571   |       |   |                      |                                 |



|                              |              |                    |                                 |              |                                                                                                                                                      |                           |   |                                 |                                                                          |                                                              |
|------------------------------|--------------|--------------------|---------------------------------|--------------|------------------------------------------------------------------------------------------------------------------------------------------------------|---------------------------|---|---------------------------------|--------------------------------------------------------------------------|--------------------------------------------------------------|
| Brown dog tick phlebovirus 1 | Unclassified | <i>Phlebovirus</i> | <i>Phenuivirid</i><br><i>ae</i> | ssRN<br>A(-) | MZ244<br>261,<br>MZ244<br>260,<br>MZ244<br>259,<br>MZ244<br>256,<br>MN02<br>5507,<br>MN02<br>5506                                                    | Parti<br>al<br>geno<br>me | ? | 2019<br>(Sameroff et al., 2019) | <i>R. sanguineus</i><br><i>R. microplus</i><br>(Sameroff et al., 2019)   | China,<br>Trinidad and Tobago<br>(Sameroff et al., 2019)     |
| Brown dog tick phlebovirus 2 | Unclassified | <i>Phlebovirus</i> | <i>Phenuivirid</i><br><i>ae</i> | ssRN<br>A(-) | MW56<br>1139,<br>MW56<br>1138,<br>MW56<br>1137,<br>MW56<br>1136,<br>MN02<br>5509,<br>MN02<br>5508                                                    | Parti<br>al<br>geno<br>me | ? | 2019<br>(Sameroff et al., 2019) | <i>R. microplus</i> ,<br><i>R. sanguineus</i><br>(Sameroff et al., 2019) | China,<br>Trinidad and Tobago<br>(Sameroff et al., 2019)     |
| Changping tick virus 1       | Unclassified | <i>Phlebovirus</i> | <i>Phenuivirid</i><br><i>ae</i> | ssRN<br>A(-) | MW56<br>1146,<br>MW56<br>1145,<br>MW56<br>1144,<br>MW56<br>1143,<br>MW56<br>1142,<br>MW56<br>1141,<br>MW56<br>1140,<br>KM817<br>732,<br>KM817<br>665 | Parti<br>al<br>geno<br>me | ? | 2015<br>(Li et al., 2015)       | <i>Dermacentor</i> spp. (Li et al., 2015)                                | China,<br>Romania<br>(Matsuno et al., 2013; Li et al., 2015) |
| Lanjan virus                 | Unclassified | <i>Phlebovirus</i> | <i>Phenuivirid</i><br><i>ae</i> | ssRN<br>A(-) | KM370<br>974                                                                                                                                         | Parti<br>al<br>geno<br>me | ? | 1967<br>(Tan et al., 1967)      | <i>D. auratus</i><br>(Shi et al., 2018)                                  | Malaysia<br>(Shi et al., 2018)                               |

|                                        |              |                    |                                    |              |                                                                 |                            |   |                                             |                                                         |                                                    |
|----------------------------------------|--------------|--------------------|------------------------------------|--------------|-----------------------------------------------------------------|----------------------------|---|---------------------------------------------|---------------------------------------------------------|----------------------------------------------------|
| Palma virus                            | Unclassified | <i>Phlebovirus</i> | <i>Phenuivirid</i><br><i>ae</i>    | ssRN<br>A(-) | JX9616<br>30,<br>JX9616<br>29,<br>JX9616<br>28                  | Parti<br>al<br>geno<br>me  | ? | 1994<br>(Filipe<br>et al.,<br>1994)         | <i>H. punctate</i><br>(Shi et al.,<br>2018)             | Portugal (Shi<br>et al., 2018)                     |
| Rhipicephalus associated phlebovirus 1 | Unclassified | <i>Phlebovirus</i> | <i>Phenuivirid</i><br><i>ae</i>    | ssRN<br>A(-) | MZ244<br>255,<br>MZ244<br>254,<br>MH814<br>976,<br>MH814<br>975 | Parti<br>al<br>geno<br>me  | ? | 2021<br>(Shi et<br>al.,<br>2021)            | <i>R. microplus</i><br>(Shi et al.,<br>2021)            | China (Shi et<br>al., 2021)                        |
| Tick phlebovirus Anatolia 1            | Unclassified | <i>Phlebovirus</i> | <i>Phenuivirid</i><br><i>ae</i>    | ssRN<br>A(-) | MG764<br>522,<br>MG764<br>521                                   | Parti<br>al<br>geno<br>me  | ? | 2018<br>(Brink<br>mann<br>et al.,<br>2018)  | <i>R. sanguineus</i><br>(Brinkman<br>n et al.,<br>2018) | Turkey<br>(Brinkmann<br>et al., 2018)              |
| Neke harbour virus                     | Unclassified | Unclassified       | <i>Orthomyxo</i><br><i>viridae</i> | ssRN<br>A(-) | MN83<br>0238                                                    | Parti<br>al<br>geno<br>me  | ? | 2020<br>(Petter<br>sson et<br>al.,<br>2020) | <i>I. uriae</i><br>(Pettersso<br>n et al.,<br>2020)     | Antarctica<br>(Pettersson<br>et al., 2020)         |
| Uumaja virus                           | Unclassified | Unclassified       | <i>Orthomyxo</i><br><i>viridae</i> | ssRN<br>A(-) | MN83<br>0237                                                    | Parti<br>al<br>geno<br>me  | ? | 2020<br>(Petter<br>sson et<br>al.,<br>2020) | <i>I. uriae</i><br>(Pettersso<br>n et al.,<br>2020)     | Northern<br>Sweden<br>(Pettersson<br>et al., 2020) |
| Khasan virus                           | Unclassified | Unclassified       | <i>Peribunyavi</i><br><i>ridae</i> | ssRN<br>A(-) | KF8920<br>46,<br>KF8920<br>47,<br>KF8920<br>48                  | Parti<br>al<br>geno<br>me  | ? | 1978<br>(L'vov<br>et al.,<br>1978)          | <i>H. longgicornis</i><br>(Shi et al.,<br>2018)         | Russia (Shi<br>et al., 2018)                       |
| American dog tick rhabdovirus 2        | Unclassified | Unclassified       | <i>Rhabdovirid</i><br><i>ae</i>    | ssRN<br>A(-) | MF962<br>659,<br>MF962<br>661                                   | Parti<br>al<br>geno<br>me  | ? | 2018<br>(Tokar<br>z et al.,<br>2018)        | <i>I. scapularis</i><br>(Tokarz et<br>al., 2018)        | USA (Tokarz<br>et al., 2018)                       |
| Blacklegged tick rhabdovirus 1         | Unclassified | Unclassified       | <i>Rhabdovirid</i><br><i>ae</i>    | ssRN<br>A(-) | MF360<br>790                                                    | Com<br>plete<br>geno<br>me | ? | 2018<br>(Tokar<br>z et al.,<br>2018)        | <i>I. scapularis</i><br>(Tokarz et<br>al., 2018)        | USA (Tokarz<br>et al., 2018)                       |
| Dog tick rhabdovirus 1                 | Unclassified | Unclassified       | <i>Rhabdovirid</i><br><i>ae</i>    | ssRN<br>A(-) | MF360<br>791                                                    | Parti<br>al                | ? | 2018<br>(Tokar<br>z et al.,<br>2018)        | <i>I. scapularis</i><br>(Tokarz et<br>al., 2018)        | USA (Tokarz<br>et al., 2018)                       |

|                                            |              |              |                                     |              |                                                |       |   |       |                           |                                                                                                                         |                                                     |
|--------------------------------------------|--------------|--------------|-------------------------------------|--------------|------------------------------------------------|-------|---|-------|---------------------------|-------------------------------------------------------------------------------------------------------------------------|-----------------------------------------------------|
|                                            |              |              |                                     |              |                                                |       |   | geno  | z et al.,                 | (Tokarz et                                                                                                              |                                                     |
|                                            |              |              |                                     |              |                                                |       |   | me    | 2018)                     | al., 2018)                                                                                                              |                                                     |
| Huangpi tick virus 3                       | Unclassified | Unclassified | <i>Rhabdovirid</i><br><i>ae</i>     | ssRN<br>A(-) | NC_03<br>1083                                  | Com   | ? | plete | 2015                      | <i>H. doenitzi</i>                                                                                                      | China (Li et al., 2015)                             |
|                                            |              |              |                                     |              |                                                |       |   | geno  | al.,                      | (Li et al., 2015)                                                                                                       |                                                     |
|                                            |              |              |                                     |              |                                                |       |   | me    | 2015)                     |                                                                                                                         |                                                     |
| Nayun tick rhabdovirus                     | Unclassified | Unclassified | <i>Rhabdovirid</i><br><i>ae</i>     | ssRN<br>A(-) | KP141<br>757                                   | Parti | ? | al    | 2015                      | <i>Rhipicephalus</i> spp.                                                                                               | China (Xia et al., 2015)                            |
|                                            |              |              |                                     |              |                                                |       |   | geno  | al.,                      | (Xia et al., 2015)                                                                                                      |                                                     |
|                                            |              |              |                                     |              |                                                |       |   | me    | 2015)                     |                                                                                                                         |                                                     |
| Rhipicephalus associated rhabdo-like virus | Unclassified | Unclassified | <i>Rhabdovirid</i><br><i>ae</i>     | ssRN<br>A(-) | MH814<br>974                                   | Parti | ? | al    | 2021                      | <i>H. longicornis</i> ,<br><i>R. microplus</i>                                                                          | China (Shi et al., 2021)                            |
|                                            |              |              |                                     |              |                                                |       |   | geno  | al.,                      | (Shi et al., 2021)                                                                                                      |                                                     |
|                                            |              |              |                                     |              |                                                |       |   | me    | 2021)                     |                                                                                                                         |                                                     |
| Tacheng tick virus 3                       | Unclassified | Unclassified | <i>Rhabdovirid</i><br><i>ae</i>     | ssRN<br>A(-) | NC_03<br>1268                                  | Com   | ? | plete | 2015                      | <i>D. marginatus</i>                                                                                                    | China (Li et al., 2015)                             |
|                                            |              |              |                                     |              |                                                |       |   | geno  | al.,                      | (Li et al., 2015)                                                                                                       |                                                     |
|                                            |              |              |                                     |              |                                                |       |   | me    | 2015)                     |                                                                                                                         |                                                     |
| Tacheng tick virus 7                       | Unclassified | Unclassified | <i>Rhabdovirid</i><br><i>ae</i>     | ssRN<br>A(-) | NC_03<br>1272                                  | Com   | ? | plete | 2015                      | <i>A. miniatus</i>                                                                                                      | China (Li et al., 2015)                             |
|                                            |              |              |                                     |              |                                                |       |   | geno  | al.,                      | (Li et al., 2015)                                                                                                       |                                                     |
|                                            |              |              |                                     |              |                                                |       |   | me    | 2015)                     |                                                                                                                         |                                                     |
| Taishun tick virus                         | Unclassified | Unclassified | <i>Rhabdovirid</i><br><i>ae</i>     | ssRN<br>A(-) | NC_03<br>1273                                  | Com   | ? | plete | 2015                      | <i>H. hystricis</i>                                                                                                     | China, Russia (Li et al., 2015)                     |
|                                            |              |              |                                     |              |                                                |       |   | geno  | al.,                      | (Li et al., 2015)                                                                                                       |                                                     |
|                                            |              |              |                                     |              |                                                |       |   | me    | 2015)                     |                                                                                                                         |                                                     |
| Deer tick mononegavirales-like virus       | Unclassified | Unclassified | Unclassified                        | ssRN<br>A(-) | MG880<br>117,<br>KM048<br>317,<br>KJ7469<br>03 | Parti | ? | al    | 2014                      | <i>D. nuttalli</i> ,<br><i>D. silvarum</i> ,<br><i>H. concinna</i> ,<br><i>I. persulcatus</i> ,<br><i>I. scapularis</i> | China, USA (Tokarz et al., 2014; Zhao et al., 2021) |
|                                            |              |              |                                     |              |                                                |       |   | geno  | z et al.,                 | (Tokarz et al., 2014; Zhao et al., 2021)                                                                                |                                                     |
|                                            |              |              |                                     |              |                                                |       |   | me    | 2014)                     |                                                                                                                         |                                                     |
| Bonden virus                               | Unclassified | Unclassified | Unclassified<br><i>Bunyavirales</i> | ssRN<br>A(-) | MN83<br>0227                                   | Parti | ? | al    | 2020                      | <i>I. uriae</i>                                                                                                         | Northern Sweden (Pettersson et al., 2020)           |
|                                            |              |              |                                     |              |                                                |       |   | geno  | (Pettersson et al., 2020) | (Pettersson et al., 2020)                                                                                               |                                                     |
|                                            |              |              |                                     |              |                                                |       |   | me    | 2020)                     |                                                                                                                         |                                                     |

|                        |              |              |                                               |              |                                                                                  |                           |   |                                   |                                                                        |                                              |
|------------------------|--------------|--------------|-----------------------------------------------|--------------|----------------------------------------------------------------------------------|---------------------------|---|-----------------------------------|------------------------------------------------------------------------|----------------------------------------------|
| Bronnoya virus         | Unclassified | Unclassified | <i>Unclassified</i><br><i>Bunyavirales</i>    | ssRN<br>A(-) | MF141<br>063,<br>MF141<br>062                                                    | Parti<br>al<br>geno<br>me | ? | 2017<br>(Pettersson et al., 2017) | <i>I. ricinus</i><br>(Pettersson et al., 2017)                         | Norway<br>(Pettersson et al., 2017)          |
| Ubmeje virus           | Unclassified | Unclassified | <i>Unclassified</i><br><i>Bunyavirales</i>    | ssRN<br>A(-) | MN83<br>0232                                                                     | Parti<br>al<br>geno<br>me | ? | 2020<br>(Pettersson et al., 2020) | <i>I. uriae</i><br>(Pettersson et al., 2020)                           | Northern Sweden<br>(Pettersson et al., 2020) |
| Norway mononegavirus 1 | Unclassified | Unclassified | <i>Unclassified</i><br><i>Mononegavirales</i> | ssRN<br>A(-) | MF141<br>072                                                                     | Parti<br>al<br>geno<br>me | ? | 2017<br>(Pettersson et al., 2017) | <i>I. ricinus</i><br>(Pettersson et al., 2017)                         | Norway<br>(Pettersson et al., 2017)          |
| Tick mononegavirus     | Unclassified | Unclassified | <i>Unclassified</i><br><i>Mononegavirales</i> | ssRN<br>A(-) | MZ244<br>310,<br>MH835<br>441,<br>MH835<br>440,<br>MH835<br>439,<br>MH835<br>438 | Parti<br>al<br>geno<br>me | ? | 2018<br>(Yang et al., 2018)       | <i>I. scapularis</i> ,<br><i>H. longicornis</i><br>(Yang et al., 2018) | China (Yang et al., 2018)                    |
| Umea virus             | Unclassified | Unclassified | <i>Unclassified</i><br><i>Mononegavirales</i> | ssRN<br>A(-) | MN83<br>0236                                                                     | Parti<br>al<br>geno<br>me | ? | 2020<br>(Pettersson et al., 2020) | <i>I. uriae</i><br>(Pettersson et al., 2020)                           | Sweden<br>(Pettersson et al., 2020)          |
| Canne point virus      | Unclassified | Unclassified | <i>Unclassified</i><br><i>Riboviria</i>       | ssRN<br>A(-) | MK026<br>566                                                                     | Parti<br>al<br>geno<br>me | ? | 2018<br>(Harvey et al., 2018)     | <i>Am. moreliae</i><br>(Harvey et al., 2018)                           | Australia<br>(Harvey et al., 2018)           |
| Fairlight virus        | Unclassified | Unclassified | <i>Unclassified</i><br><i>Riboviria</i>       | ssRN<br>A(-) | MK026<br>565                                                                     | Parti<br>al<br>geno<br>me | ? | 2018<br>(Harvey et al., 2018)     | <i>Am. moreliae</i><br>(Harvey et al., 2018)                           | Australia<br>(Harvey et al., 2018)           |
| Manly virus            | Unclassified | Unclassified | <i>Unclassified</i><br><i>Riboviria</i>       | ssRN<br>A(-) | MK026<br>564                                                                     | Parti<br>al<br>geno<br>me | ? | 2018<br>(Harvey et al., 2018)     | <i>Am. moreliae</i><br>(Harvey et al., 2018)                           | Australia<br>(Harvey et al., 2018)           |
| Messner virus          | Unclassified | Unclassified | <i>Unclassified</i><br><i>Riboviria</i>       | ssRN<br>A(-) | MT025<br>174                                                                     | Parti<br>al<br>geno<br>me | ? | 2020<br>(Wille et al., 2020)      | <i>I. uriae</i><br>(Wille et al., 2020)                                | Antarctica<br>(Wille et al., 2020)           |

|                        |                            |                   |                               |           |                                                       |                 |   |                                                    |                                                               |                                                                           |
|------------------------|----------------------------|-------------------|-------------------------------|-----------|-------------------------------------------------------|-----------------|---|----------------------------------------------------|---------------------------------------------------------------|---------------------------------------------------------------------------|
| North Shore virus      | Unclassified               | Unclassified      | <i>Unclassified Riboviria</i> | ssRN A(-) | OL452 126                                             | Partial genome  | ? | 2018 (Harvey et al., 2018)                         | <i>I. holocyclus</i> (Harvey et al., 2018)                    | Australia (Harvey et al., 2018)                                           |
| Old quarry swamp virus | Unclassified               | Unclassified      | <i>Unclassified Riboviria</i> | ssRN A(-) | MK026 595, MK026 596, MK026 597, MK026 598, MK026 599 | Partial genome  | ? | 2018 (Harvey et al., 2018)                         | <i>I. holocyclus</i> (Harvey et al., 2018)                    | Australia (Harvey et al., 2018)                                           |
| Piguzov virus          | Unclassified               | Unclassified      | <i>Unclassified Riboviria</i> | ssRN A(-) | MT025 176, MT025 177                                  | Partial genome  | ? | 2020 (Pettersson et al., 2020)                     | <i>I. uriae</i> (Pettersson et al., 2020)                     | Antarctica (Pettersson et al., 2020)                                      |
| Quarantine Head virus  | Unclassified               | Unclassified      | <i>Unclassified Riboviria</i> | ssRN A(-) | MK026 568                                             | Partial genome  | ? | 2018 (Harvey et al., 2018)                         | <i>Am. moreliae</i> (Harvey et al., 2018)                     | Australia (Harvey et al., 2018)                                           |
| Ronne virus            | Unclassified               | Unclassified      | <i>Unclassified Riboviria</i> | ssRN A(-) | MT025 165, MT025 164                                  | Partial genome  | ? | 2020 (Pettersson et al., 2020; Wille et al., 2020) | <i>I. uriae</i> (Pettersson et al., 2020; Wille et al., 2020) | Antarctica, Northern Sweden (Pettersson et al., 2020; Wille et al., 2020) |
| Tacheng tick virus 5   | Unclassified               | Unclassified      | <i>Unclassified Riboviria</i> | ssRN A(-) | NC_02 8264                                            | Complete genome | ? | 2015 (Li et al., 2015)                             | <i>D. marginatus</i> (Li et al., 2015)                        | China, Kazakhstan (Li et al., 2015)                                       |
| Timbillica virus       | Unclassified               | Unclassified      | <i>Unclassified Riboviria</i> | ssRN A(-) | MK026 589, MK026 590                                  | Partial genome  | ? | 2018 (Harvey et al., 2018)                         | <i>I. holocyclus</i> (Harvey et al., 2018)                    | Australia (Harvey et al., 2018)                                           |
| Gadgets Gully virus    | <i>Gadgets Gully virus</i> | <i>Flavivirus</i> | <i>Flaviviridae</i>           | ssRN A(+) | NC_03 3723                                            | Complete genome | ? | 1985 (St George et al., 1985)                      | <i>I. uriae</i> (Pettersson et al., 2020)                     | Antarctica, Australia (Pettersson et al., 2020)                           |

|                                  |                                      |                   |                     |              |               |                            |                              |                                      |                                                                            |                                                                       |
|----------------------------------|--------------------------------------|-------------------|---------------------|--------------|---------------|----------------------------|------------------------------|--------------------------------------|----------------------------------------------------------------------------|-----------------------------------------------------------------------|
| Kadam virus                      | <i>Kadam virus</i>                   | <i>Flavivirus</i> | <i>Flaviviridae</i> | ssRN<br>A(+) | NC_03<br>3724 | Com<br>plete<br>geno<br>me | ?                            | 1970<br>(Henderson et al., 1970)     | <i>R. pravus</i><br>(Shi et al., 2018)                                     | Saudi Arabia, Uganda (Shi et al., 2018)                               |
| Alkhumra hemorrhagic fever virus | <i>Kyasanur Forest disease virus</i> | <i>Flavivirus</i> | <i>Flaviviridae</i> | ssRN<br>A(+) | AF331<br>718  | Com<br>plete<br>geno<br>me | Y<br>(Grard et al., 2007)    | 1957<br>(Work et al., 1957)          | <i>H. spinigera</i> ,<br><i>O. savignyi</i><br>(Shi et al., 2018)          | India, Saudi Arabia (Shi et al., 2018)                                |
| Langat virus                     | <i>Langat virus</i>                  | <i>Flavivirus</i> | <i>Flaviviridae</i> | ssRN<br>A(+) | AF253<br>419  | Com<br>plete<br>geno<br>me | ?                            | 1956<br>(Smith et al., 1956)         | <i>I. granulatus</i><br>(Shi et al., 2018)                                 | Malaysia (Shi et al., 2018)                                           |
| Louping ill virus                | <i>Louping ill virus</i>             | <i>Flavivirus</i> | <i>Flaviviridae</i> | ssRN<br>A(+) | Y0786<br>3    | Com<br>plete<br>geno<br>me | Y<br>(Davidson et al., 1991) | 1931<br>(Greig et al., 1931)         | <i>I. ricinus</i><br>(Shi et al., 2018)                                    | England, Ireland, Scotland, Wales (Shi et al., 2018)                  |
| Meaban virus                     | <i>Meaban virus</i>                  | <i>Flavivirus</i> | <i>Flaviviridae</i> | ssRN<br>A(+) | NC_03<br>3721 | Com<br>plete<br>geno<br>me | ?                            | 1985<br>(Chastel et al., 1985)       | <i>O. maritimus</i><br>(Shi et al., 2018)                                  | France (Shi et al., 2018)                                             |
| Omsk hemorrhagic fever virus     | <i>Omsk hemorrhagic fever virus</i>  | <i>Flavivirus</i> | <i>Flaviviridae</i> | ssRN<br>A(+) | AY193<br>805  | Com<br>plete<br>geno<br>me | Y<br>(Grard et al., 2007)    | 1989<br>(Gaidamovich et al., 1989)   | <i>Dermacentor spp.</i> ,<br><i>I. persculatus</i><br>(Ruzek et al., 2010) | Russia (Grard et al., 2007)                                           |
| Deer tick virus                  | <i>Powassan virus</i>                | <i>Flavivirus</i> | <i>Flaviviridae</i> | ssRN<br>A(+) | AF311<br>056  | Com<br>plete<br>geno<br>me | ?                            | 1997<br>(Telford et al., 1997)       | <i>I. scapularis</i><br>(Mansfield et al., 2017; Shi et al., 2018)         | New England, North America (Mansfield et al., 2017; Shi et al., 2018) |
| Powassan virus                   | <i>Powassan virus</i>                | <i>Flavivirus</i> | <i>Flaviviridae</i> | ssRN<br>A(+) | L06436        | Com<br>plete<br>geno<br>me | Y<br>(Tokarz et al., 2014)   | 1959<br>(McLellan and Donohue, 1959) | <i>I. cookei</i> ,<br><i>Ixodes spp.</i><br>(Tokarz et al., 2014)          | North America, Russia (Mansfield et al., 2017)                        |
| Karshi virus                     | <i>Royal Farm virus</i>              | <i>Flavivirus</i> | <i>Flaviviridae</i> | ssRN<br>A(+) | AY863<br>002  | Com<br>plete               | ?                            | 1976<br>(L'vov et al., 1976)         | <i>A. hermanni</i>                                                         | North of Central Asia,                                                |

|                                       |                                      |                   |                        |           |                      |                 |                      |                                |                                                              |                                                            |
|---------------------------------------|--------------------------------------|-------------------|------------------------|-----------|----------------------|-----------------|----------------------|--------------------------------|--------------------------------------------------------------|------------------------------------------------------------|
|                                       |                                      |                   |                        |           |                      | geno            |                      | et al.,                        | <i>O.</i>                                                    | Uzbek (Shi et                                              |
|                                       |                                      |                   |                        |           |                      | me              |                      | 1976)                          | <i>papillipes</i>                                            | al., 2018)                                                 |
|                                       |                                      |                   |                        |           |                      |                 |                      |                                | (Shi et al.,                                                 | 2018)                                                      |
| Saumarez Reef virus                   | <i>Saumarez Reef virus</i>           | <i>Flavivirus</i> | <i>Flaviviridae</i>    | ssRN A(+) | DQ235 150            | Complete genome | ?                    | 1977 (St Georg e et al., 1977) | <i>I. eudyptidis</i> , <i>O. capensis</i>                    | Australia (Shi et al., 2018)                               |
| Tick-borne encephalitis virus         | <i>Tick-borne encephalitis virus</i> | <i>Flavivirus</i> | <i>Flaviviridae</i>    | ssRN A(+) | NC_00 1672           | Complete genome | Y (Shi et al., 2018) | 1931 (Schneider et al., 1931)  | <i>I. ovatus</i> , <i>I. persulcatus</i> , <i>I. ricinus</i> | Northern Asia, Northern Europe, Siberia (Shi et al., 2018) |
| Tyuleniy virus                        | <i>Tyuleniy virus</i>                | <i>Flavivirus</i> | <i>Flaviviridae</i>    | ssRN A(+) | NC_02 3424           | Complete genome | ?                    | 1971 (L'vov et al., 1971)      | <i>I. putus</i>                                              | Tuleniy Island (Shi et al., 2018)                          |
| Ixodes holocyclus iflavivirus         | <i>Ixodes holocyclus iflavivirus</i> | <i>Iflavirus</i>  | <i>Iflaviridae</i>     | ssRN A(+) | OL452 115            | Partial genome  | ?                    | 2018 (O'Brien et al., 2018)    | <i>I. holocyclus</i>                                         | Australia (O'Brien et al., 2018)                           |
| Blacklegged tick associated ilarvirus | Unclassified                         | <i>Iflavirus</i>  | <i>Bromoviridae</i>    | ssRN A(+) | MG647 776, MG647 777 | Partial genome  | ?                    | 2018 (Tokarz et al., 2018)     | <i>I. scapularis</i> ( <i>Tokarz et al., 2018</i> )          | USA (Tokarz et al., 2018)                                  |
| Trinidad virus                        | Unclassified                         | <i>Pestivirus</i> | <i>Flaviviridae</i>    | ssRN A(+) | MN02 5505            | Partial genome  | ?                    | 2019 (Sameroff et al., 2019)   | <i>A. ovale</i> , <i>R. microplus</i> , <i>R. sanguineus</i> | Trinidad, Tobago (Sameroff et al., 2019)                   |
| Cattle tick tymovirus-like virus 1    | Unclassified                         | <i>Tymovirus</i>  | <i>Tymoviridae</i>     | ssRN A(+) | MN02 5504            | Partial genome  | ?                    | 2019 (Sameroff et al., 2019)   | <i>R. microplus</i>                                          | Trinidad and Tobago (Sameroff et al., 2019)                |
| Lone star tick dicistroviruses        | Unclassified                         | Unclassified      | <i>Dicistroviridae</i> | ssRN A(+) | KX774 633            | Partial genome  | ?                    | 2018 (Tokarz et al., 2018)     | <i>I. scapularis</i> ( <i>Tokarz et al., 2018</i> )          | USA (Tokarz et al., 2018)                                  |
| Alongshan virus                       | Unclassified                         | Unclassified      | <i>Flaviviridae</i>    | ssRN A(+) | MN64 8770,           | Partial genome  | Y (Wan               | 2019 (Kuiva                    | <i>I. persulcatus</i>                                        | China, France,                                             |

|            |              |              |                     |      |       |       |         |           |                      |               |
|------------|--------------|--------------|---------------------|------|-------|-------|---------|-----------|----------------------|---------------|
|            |              |              |                     |      | MN64  | geno  | g et    | nen et    | <i>s. l. ricinus</i> | Finland       |
|            |              |              |                     |      | 8771, | me    | al.,    | al.,      | (Kholodilo           | (Kholodilov   |
|            |              |              |                     |      | MN64  |       | 2019)   | 2019)     | v et al.,            | et al., 2020) |
|            |              |              |                     |      | 8772, |       |         |           | 2020)                |               |
|            |              |              |                     |      | MN64  |       |         |           |                      |               |
|            |              |              |                     |      | 8773  |       |         |           |                      |               |
| Jingmen    | Unclassified | Unclassified | <i>Flaviviridae</i> | ssRN | MK721 | Com   | Y (Jia  | 2014      | <i>Am.</i>           | Many          |
| tick virus |              |              |                     | A(+) | 629,  | plete | et al., | (Qin et   | <i>javanense,</i>    | countries in  |
|            |              |              |                     |      | MK721 | geno  | 2019)   | al.,      | <i>D. nuttalli,</i>  | Asia,         |
|            |              |              |                     |      | 630,  | me    |         | 2014)     | <i>Haemaphy</i>      | America,      |
|            |              |              |                     |      | MK721 |       |         |           | <i>salis spp.,</i>   | and Africa    |
|            |              |              |                     |      | 631,  |       |         |           | <i>Ixodes</i>        | (Vandegrift   |
|            |              |              |                     |      | MK721 |       |         |           | <i>spp.,</i>         | et al., 2020; |
|            |              |              |                     |      | 632   |       |         |           | <i>Rhipicepha</i>    | Zhao et al.,  |
|            |              |              |                     |      |       |       |         |           | <i>lus spp.</i>      | 2021)         |
|            |              |              |                     |      |       |       |         |           | (Zhao et             | al., 2021)    |
| Norway     | Unclassified | Unclassified | <i>Luteovirida</i>  | ssRN | MF141 | Parti | ?       | 2017      | <i>I. ricinus</i>    | Norway        |
| luteo-like |              |              | <i>e</i>            | A(+) | 065   | al    |         | (Petter   | (Pettersso           | (Pettersson   |
| virus 1    |              |              |                     |      |       | geno  |         | sson et   | n et al.,            | et al., 2017) |
|            |              |              |                     |      |       | me    |         | al.,      | 2017)                |               |
| Norway     | Unclassified | Unclassified | <i>Luteovirida</i>  | ssRN | MF141 | Parti | ?       | 2017      | <i>I. ricinus</i>    | Norway        |
| luteo-like |              |              | <i>e</i>            | A(+) | 068   | al    |         | (Petter   | (Pettersso           | (Pettersson   |
| virus 2    |              |              |                     |      |       | geno  |         | sson et   | n et al.,            | et al., 2017) |
|            |              |              |                     |      |       | me    |         | al.,      | 2017)                |               |
| Norway     | Unclassified | Unclassified | <i>Luteovirida</i>  | ssRN | MF141 | Parti | ?       | 2017      | <i>I. ricinus</i>    | Norway        |
| luteo-like |              |              | <i>e</i>            | A(+) | 069   | al    |         | (Petter   | (Pettersso           | (Pettersson   |
| virus 3    |              |              |                     |      |       | geno  |         | sson et   | n et al.,            | et al., 2017) |
|            |              |              |                     |      |       | me    |         | al.,      | 2017)                |               |
| Norway     | Unclassified | Unclassified | <i>Luteovirida</i>  | ssRN | MF141 | Parti | ?       | 2017      | <i>I. ricinus</i>    | Norway        |
| luteo-like |              |              | <i>e</i>            | A(+) | 070   | al    |         | (Petter   | (Pettersso           | (Pettersson   |
| virus 4    |              |              |                     |      |       | geno  |         | sson et   | n et al.,            | et al., 2017) |
|            |              |              |                     |      |       | me    |         | al.,      | 2017)                |               |
| Lone star  | Unclassified | Unclassified | <i>Nodavirida</i>   | ssRN | KX774 | Parti | ?       | 2018      | <i>I.</i>            | USA (Tokarz   |
| tick       |              |              | <i>e</i>            | A(+) | 635,  | al    |         | (Tokar    | <i>scapularis</i>    | et al., 2018) |
| nodavirus  |              |              |                     |      | KX774 | geno  |         | z et al., | (Tokarz et           |               |
|            |              |              |                     |      | 634   | me    |         | 2018)     | <i>al., 2018)</i>    |               |
| Paradise   | Unclassified | Unclassified | <i>Tombusviri</i>   | ssRN | MN83  | Parti | ?       | 2020      | <i>I. uriae</i>      | Antarctica    |
| bay virus  |              |              | <i>dae</i>          | A(+) | 0247  | al    |         | (Petter   | (Pettersso           | (Pettersson   |
|            |              |              |                     |      |       | geno  |         | sson et   | n et al.,            | et al., 2020) |
|            |              |              |                     |      |       | me    |         | al.,      | 2020)                |               |



|                                       |              |              |                                    |           |                                            |           |   |                                |                                                                                                                                                  |                                                                                 |
|---------------------------------------|--------------|--------------|------------------------------------|-----------|--------------------------------------------|-----------|---|--------------------------------|--------------------------------------------------------------------------------------------------------------------------------------------------|---------------------------------------------------------------------------------|
| Upmeje virus                          | Unclassified | Unclassified | <i>Tombusviri dae</i>              | ssRN A(+) | MN83 0246                                  | Parti al  | ? | 2020 (Pettersson et al., 2020) | <i>I. uriae</i> (Pettersson et al., 2020)                                                                                                        | Northern Sweden (Pettersson et al., 2020)                                       |
| Bagotville virus                      | Unclassified | Unclassified | <i>Unclassified Picornavirales</i> | ssRN A(+) | MW74 1892                                  | Parti al  | ? | 2021 (Chandra et al., 2021)    | <i>I. holocyclus</i> (Chandra et al., 2021)                                                                                                      | Australia (Chandra et al., 2021)                                                |
| Blacklegged tick picorna-like virus 1 | Unclassified | Unclassified | <i>Unclassified Picornavirales</i> | ssRN A(+) | MG647 769, MG647 774                       | Parti al  | ? | 2018 (Tokarz et al., 2018)     | <i>I. scapularis</i> (Tokarz et al., 2018)                                                                                                       | USA (Tokarz et al., 2018)                                                       |
| Blacklegged tick picorna-like virus 2 | Unclassified | Unclassified | <i>Unclassified Picornavirales</i> | ssRN A(+) | MG647 773, MG647 772, MG647 771, MG647 770 | Parti al  | ? | 2018 (Tokarz et al., 2018)     | <i>I. scapularis</i> (Tokarz et al., 2018)                                                                                                       | USA (Tokarz et al., 2018)                                                       |
| Wardell virus                         | Unclassified | Unclassified | <i>Unclassified Picornavirales</i> | ssRN A(+) | MW74 1896, MW74 1895, MW74 1894            | Parti al  | ? | 2021 (Chandra et al., 2021)    | <i>I. holocyclus</i> (Chandra et al., 2021)                                                                                                      | Australia (Chandra et al., 2021)                                                |
| Woodburn virus                        | Unclassified | Unclassified | <i>Unclassified Picornavirales</i> | ssRN A(+) | MW74 1893                                  | Parti al  | ? | 2021 (Chandra et al., 2021)    | <i>I. holocyclus</i> (Chandra et al., 2021)                                                                                                      | Australia (Chandra et al., 2021)                                                |
| Blue Fish Point virus                 | Unclassified | Unclassified | <i>Unclassified Riboviria</i>      | ssRN A(+) | MK026 570, MK026 571                       | Parti al  | ? | 2018 (Harvey et al., 2018)     | <i>I. holocyclus</i> (Harvey et al., 2018)                                                                                                       | Australia (Harvey et al., 2018)                                                 |
| Bole tick virus 4                     | Unclassified | Unclassified | <i>Unclassified Riboviria</i>      | ssRN A(+) | MZ244 286                                  | Com plete | ? | 2015 (Shi et al., 2015)        | <i>D. marginatus</i> , <i>D. asiaticum</i> , <i>D. asiaticum</i> , <i>D. asiaticum</i> , <i>H. asiaticum</i> , <i>Hy. asiaticum</i> , <i>Hy.</i> | China, Romania, Saudi Arabia, Thailand, Trinidad, Tobago (Temmam et al., 2019); |

|                             |              |              |                                         |              |                                                |                           |   |                                                                          |                                                                                                                                                                                                                                  |                                                                      |
|-----------------------------|--------------|--------------|-----------------------------------------|--------------|------------------------------------------------|---------------------------|---|--------------------------------------------------------------------------|----------------------------------------------------------------------------------------------------------------------------------------------------------------------------------------------------------------------------------|----------------------------------------------------------------------|
|                             |              |              |                                         |              |                                                |                           |   |                                                                          | <i>detrinum</i> ,<br><i>R.</i><br><i>microplus</i> ,<br><i>R.</i><br><i>sanguineus</i><br>( <i>Temmam</i><br><i>et al.</i> ,<br>2019;<br><i>Bratuleanu</i><br><i>et al.</i> ,<br>2021;<br><i>Zakham et</i><br><i>al.</i> , 2021) | Bratuleanu<br>et al., 2021;<br>Zakham et<br>al., 2021)               |
| Bulatov<br>virus            | Unclassified | Unclassified | <i>Unclassified</i><br><i>Riboviria</i> | ssRN<br>A(+) | MN83<br>0234,<br>MT025<br>173                  | Parti<br>al<br>geno<br>me | ? | 2020<br>(Petter<br>sson et<br>al.,<br>2020;<br>Wille<br>et al.,<br>2020) | <i>I. uriae</i><br>(Pettersso<br>n et al.,<br>2020)                                                                                                                                                                              | Antarctica<br>(Pettersson<br>et al., 2020)                           |
| Collins<br>beach virus      | Unclassified | Unclassified | <i>Unclassified</i><br><i>Riboviria</i> | ssRN<br>A(+) | MK026<br>585                                   | Parti<br>al<br>geno<br>me | ? | 2018<br>(Harve<br>y et al.,<br>2018)                                     | <i>I. holocyclus</i><br>( <i>Harvey et</i><br><i>al.</i> , 2018)                                                                                                                                                                 | Australia<br>(Harvey et<br>al., 2018)                                |
| Fairfax<br>Lookout<br>virus | Unclassified | Unclassified | <i>Unclassified</i><br><i>Riboviria</i> | ssRN<br>A(+) | MK026<br>588,<br>MK026<br>587,<br>MK026<br>586 | Parti<br>al<br>geno<br>me | ? | 2018<br>(Harve<br>y et al.,<br>2018)                                     | <i>I. holocyclus</i><br>( <i>Harvey et</i><br><i>al.</i> , 2018)                                                                                                                                                                 | Australia<br>(Harvey et<br>al., 2018)                                |
| Gerbovich<br>virus          | Unclassified | Unclassified | <i>Unclassified</i><br><i>Riboviria</i> | ssRN<br>A(+) | MN83<br>0239,<br>MT025<br>175                  | Parti<br>al<br>geno<br>me | ? | 2020<br>(Petter<br>sson et<br>al.,<br>2020;<br>Wille<br>et al.,<br>2020) | <i>I. uriae</i><br>(Pettersso<br>n et al.,<br>2020; Wille<br>et al.,<br>2020)                                                                                                                                                    | Antarctica<br>(Pettersson<br>et al., 2020;<br>Wille et al.,<br>2020) |
| Ingleside<br>virus          | Unclassified | Unclassified | <i>Unclassified</i><br><i>Riboviria</i> | ssRN<br>A(+) | OL452<br>105                                   | Parti<br>al<br>geno<br>me | ? | 2018<br>(Harve<br>y et al.,<br>2018)                                     | <i>I. holocyclus</i><br>( <i>Harvey et</i><br><i>al.</i> , 2018)                                                                                                                                                                 | Australia<br>(Harvey et<br>al., 2018)                                |
| Ixodes<br>scapularis        | Unclassified | Unclassified | <i>Unclassified</i><br><i>Riboviria</i> | ssRN<br>A(+) | LC0949<br>65,                                  | Parti<br>al               | ? | 2017<br>(Nakao<br><i>et al.</i> )                                        | <i>I. scapularis</i><br>( <i>Tokarz et</i><br><i>al.</i> , 2018;                                                                                                                                                                 | USA, Japan<br>(Tokarz et<br>al., 2018;                               |

|                             |              |              |                                 |           |                      |               |   |      |                                               |                                                               |                                                          |
|-----------------------------|--------------|--------------|---------------------------------|-----------|----------------------|---------------|---|------|-----------------------------------------------|---------------------------------------------------------------|----------------------------------------------------------|
| associated virus 3          |              |              |                                 |           | MG677                | geno          |   |      | et al., 2017)                                 | <i>al., 2018; Nakao et al., 2017)</i>                         | Nakao et al., 2017)                                      |
| Jump Rock virus             | Unclassified | Unclassified | <i>Unclassified Riboviria</i>   | ssRN A(+) | MK026 583            | Parti al      | ? | 2018 | (Harvey et al., 2018)                         | <i>I. holocyclus (Harvey et al., 2018)</i>                    | Australia (Harvey et al., 2018)                          |
| Nadgee virus                | Unclassified | Unclassified | <i>Unclassified Riboviria</i>   | ssRN A(+) | MK026 592            | Parti al      | ? | 2018 | (Harvey et al., 2018)                         | <i>I. holocyclus (Harvey et al., 2018)</i>                    | Australia (Harvey et al., 2018)                          |
| Store beach virus           | Unclassified | Unclassified | <i>Unclassified Riboviria</i>   | ssRN A(+) | MK026 567            | Parti al      | ? | 2018 | (Harvey et al., 2018)                         | <i>Am. moreliae (Harvey et al., 2018)</i>                     | Australia (Harvey et al., 2018)                          |
| Tacheng tick virus 8        | Unclassified | Unclassified | <i>Unclassified Riboviria</i>   | ssRN A(+) | NC_02 8367           | Complete geno | ? | 2015 | (Shi et al., 2015)                            | <i>D. marginatus (Shi et al., 2015)</i>                       | China (Shi et al., 2015)                                 |
| Vovk virus                  | Unclassified | Unclassified | <i>Unclassified Riboviria</i>   | ssRN A(+) | MN83 0235, MT025 162 | Parti al      | ? | 2020 | (Pettersson et al., 2020; Wille et al., 2020) | <i>I. uriae (Pettersson et al., 2020; Wille et al., 2020)</i> | Antarctica (Pettersson et al., 2020; Wille et al., 2020) |
| Wangarabe Il virus          | Unclassified | Unclassified | <i>Unclassified Riboviria</i>   | ssRN A(+) | MK026 593            | Parti al      | ? | 2018 | (Harvey et al., 2018)                         | <i>I. holocyclus (Harvey et al., 2018)</i>                    | Australia (Harvey et al., 2018)                          |
| Yambulla virus              | Unclassified | Unclassified | <i>Unclassified Riboviria</i>   | ssRN A(+) | MK026 594            | Parti al      | ? | 2018 | (Harvey et al., 2018)                         | <i>I. holocyclus (Harvey et al., 2018)</i>                    | Australia (Harvey et al., 2018)                          |
| Antioquia tymovirus-like 1  | Unclassified | Unclassified | <i>Unclassified Tymovirales</i> | ssRN A(+) | MK683 451            | Parti al      | ? | 2020 | (Gomez et al., 2020)                          | <i>R. microplus (Gomez et al., 2020)</i>                      | Colombia (Gomez et al., 2020)                            |
| Guarapuava tymovirus-like 1 | Unclassified | Unclassified | <i>Unclassified Tymovirales</i> | ssRN A(+) | MH155 882            | Parti al      | ? | 2018 | (de Souza et al., 2018)                       | <i>R. microplus (de Souza et al., 2018)</i>                   | Brazil (de Souza et al., 2018)                           |
| American dog tick           | Unclassified | Unclassified | Unclassified                    | Unkn own  | MF962 660            | Parti al      | ? | 2018 | (Tokarz et al., 2018)                         | <i>D. variabilis (Tokarz et al., 2018)</i>                    | USA (Tokarz et al., 2018)                                |

|                                      |              |              |              |      |        |       |   |      |       |                                 |                                                      |
|--------------------------------------|--------------|--------------|--------------|------|--------|-------|---|------|-------|---------------------------------|------------------------------------------------------|
| associated virus 1                   |              |              |              |      |        |       |   |      | geno  | z et al., (Tokarz et al., 2018) |                                                      |
| American dog tick associated virus 2 | Unclassified | Unclassified | Unclassified | Unkn | MF962  | Parti | ? | 2018 | al    | (Tokarz et al., 2018)           | USA (Tokarz et al., 2018)                            |
|                                      |              |              |              |      | own    |       |   |      |       |                                 |                                                      |
|                                      |              |              |              |      | MF962  | geno  |   |      |       | z et al., (Tokarz et al., 2018) |                                                      |
|                                      |              |              |              |      | 657    | me    |   |      |       |                                 |                                                      |
| Finch Creek virus                    | Unclassified | Unclassified | Unclassified | Unkn | EU267  | Parti | ? | 2009 | al    | (Major et al., 2009)            | Australia (Major et al., 2009)                       |
|                                      |              |              |              |      | own    |       |   |      |       |                                 |                                                      |
|                                      |              |              |              |      | 169    | al    |   |      |       |                                 |                                                      |
|                                      |              |              |              |      |        | geno  |   |      |       | et al., 2009)                   |                                                      |
|                                      |              |              |              |      |        | me    |   |      |       |                                 |                                                      |
| Ganjam virus                         | Unclassified | Unclassified | Unclassified | Unkn | KU925  | Parti | ? | 1969 | al    | (Dand et al., 1969)             | India (Kuhn et al., 2016)                            |
|                                      |              |              |              |      | own    |       |   |      |       |                                 |                                                      |
|                                      |              |              |              |      | 466,   | al    |   |      |       |                                 |                                                      |
|                                      |              |              |              |      | KU925  | geno  |   |      |       | awate (Kuhn et al., 2016)       |                                                      |
|                                      |              |              |              |      | 465,   | me    |   |      |       |                                 |                                                      |
|                                      |              |              |              |      | KU925  |       |   |      |       |                                 |                                                      |
|                                      |              |              |              |      | 464    |       |   |      |       |                                 |                                                      |
| Ixodes scapularis associated virus 1 | Unclassified | Unclassified | Unclassified | Unkn | LC0949 | Parti | ? | 2014 | al    | (Tokarz et al., 2014)           | Japan, USA (Tokarz et al., 2014; Nakao et al., 2017) |
|                                      |              |              |              |      | own    |       |   |      |       |                                 |                                                      |
|                                      |              |              |              |      | 64,    | al    |   |      |       |                                 |                                                      |
|                                      |              |              |              |      | KM048  | geno  |   |      |       | z et al., (Tokarz et al., 2014) |                                                      |
|                                      |              |              |              |      | 318    | me    |   |      |       |                                 |                                                      |
| Ixodes scapularis associated virus 2 | Unclassified | Unclassified | Unclassified | Unkn | KM048  | Parti | ? | 2014 | al    | (Tokarz et al., 2014)           | USA (Tokarz et al., 2014)                            |
|                                      |              |              |              |      | own    |       |   |      |       |                                 |                                                      |
|                                      |              |              |              |      | 319    | al    |   |      |       |                                 |                                                      |
|                                      |              |              |              |      |        | geno  |   |      |       | z et al., (Tokarz et al., 2014) |                                                      |
|                                      |              |              |              |      |        | me    |   |      |       |                                 |                                                      |
| Ixodes scapularis associated virus 4 | Unclassified | Unclassified | Unclassified | Unkn | MF962  | Parti | ? | 2018 | al    | (Tokarz et al., 2018)           | USA (Tokarz et al., 2018)                            |
|                                      |              |              |              |      | own    |       |   |      |       |                                 |                                                      |
|                                      |              |              |              |      | 656    | al    |   |      |       |                                 |                                                      |
|                                      |              |              |              |      |        | geno  |   |      |       | z et al., (Tokarz et al., 2018) |                                                      |
|                                      |              |              |              |      |        | me    |   |      |       |                                 |                                                      |
| Ixodes scapularis associated virus 5 | Unclassified | Unclassified | Unclassified | Unkn | MG256  | Parti | ? | 2018 | al    | (Tokarz et al., 2018)           | USA (Tokarz et al., 2018)                            |
|                                      |              |              |              |      | own    |       |   |      |       |                                 |                                                      |
|                                      |              |              |              |      | 513    | al    |   |      |       |                                 |                                                      |
|                                      |              |              |              |      |        | geno  |   |      |       | z et al., (Tokarz et al., 2018) |                                                      |
|                                      |              |              |              |      |        | me    |   |      |       |                                 |                                                      |
| Ixodes scapularis associated virus 6 | Unclassified | Unclassified | Unclassified | Unkn | MG256  | Parti | ? | 2018 | al    | (Tokarz et al., 2018)           | USA (Tokarz et al., 2018)                            |
|                                      |              |              |              |      | own    |       |   |      |       |                                 |                                                      |
|                                      |              |              |              |      | 514    | al    |   |      |       |                                 |                                                      |
|                                      |              |              |              |      |        | geno  |   |      |       | z et al., (Tokarz et al., 2018) |                                                      |
|                                      |              |              |              |      |        | me    |   |      |       |                                 |                                                      |
| Lone star tick associated virus 1    | Unclassified | Unclassified | Unclassified | Unkn | MF962  | Parti | ? | 2018 | al    | (Tokarz et al., 2018)           | USA (Tokarz et al., 2018)                            |
|                                      |              |              |              |      | own    |       |   |      |       |                                 |                                                      |
|                                      |              |              |              |      | 658    | al    |   |      |       |                                 |                                                      |
|                                      |              |              |              |      |        | geno  |   |      |       | z et al., (Tokarz et al., 2018) |                                                      |
|                                      |              |              |              |      |        | me    |   |      |       |                                 |                                                      |
| Sapphire II virus                    | Unclassified | Unclassified | Unclassified | Unkn | MK896  | Com   | ? | 1972 | plete | (Yunker et al., 1972)           | USA (Yunker et al., 1972)                            |
|                                      |              |              |              |      | own    |       |   |      |       |                                 |                                                      |
|                                      |              |              |              |      | 468,   |       |   |      |       |                                 |                                                      |
|                                      |              |              |              |      | MK896  | geno  |   |      |       | r et al., 1972)                 |                                                      |
|                                      |              |              |              |      | 467,   | me    |   |      |       |                                 |                                                      |

| MK896                              |                                  |                        |                      |             |                                 |                   |   |      |                                     |                                                                                                                     |
|------------------------------------|----------------------------------|------------------------|----------------------|-------------|---------------------------------|-------------------|---|------|-------------------------------------|---------------------------------------------------------------------------------------------------------------------|
| 466                                |                                  |                        |                      |             |                                 |                   |   |      |                                     |                                                                                                                     |
| Tick borne tetraviruses-like virus | Unclassified                     | Unclassified           | Unclassified         | Unkn own    | MW33 4982, KM048 322            | Parti al geno me  | ? | 2014 | D. (Tokar z et al., 2014)           | USA (Tokarz et al., 2014)                                                                                           |
| Zirqa virus                        | Unclassified                     | Unclassified           | Unclassified         | Unkn own    | KU925 500, KU925 501, KU925 502 | Com plete geno me | ? | 1973 | A. cooleyi, (Varm a et al., 1973)   | Abu Dhabi (Shi et al., 2018)                                                                                        |
| Bovine hepatitis virus**           | <i>Hepacivirus N</i>             | <i>Hepacivirus</i>     | <i>Flaviviridae</i>  | ssRN A(+)   | NC_02 6797                      | Com plete geno me | ? | 2015 | Unknown (Baechlein et al., 2015)    | Brazil, China, Germany, Ghana, US (Baechlein et al., 2019)                                                          |
| HoBi-like pestivirus*              | <i>Pestivirus H</i>              | <i>Pestivirus</i>      | <i>Flaviviridae</i>  | ssRN A(+)   | MK689 376                       | Parti al geno me  | ? | 2004 | Unknown (Schirr meier et al., 2004) | Argentina, Bangladesh, Brazil, China, Germany, India, Italy, Mexico, Thailand, Turkey, USA (Bauermann et al., 2021) |
| Erve virus**                       | <i>Erve orthonairovirus</i>      | <i>Orthonairovirus</i> | <i>Nairoviridae</i>  | ssRN A(-)   | JF9116 97, JF9116 98, JF9116 99 | Com plete geno me | ? | 1989 | Unknown (Chast el et al., 1989)     | Czech Republic, France, Germany, Netherland (Dilcher et al., 2012)                                                  |
| Bovine parvovirus-2**              | <i>Ungulate copiparvovirus 1</i> | <i>Copiparvovirus</i>  | <i>Parvoviridae</i>  | ssDN A(+/-) | KT148 961                       | Com plete geno me | ? | 2001 | Unknown (Allander et al., 2001)     | Brazil, China, USA (Ng et al., 2015; Cibulski et al., 2016; Wang et al., 2018)                                      |
| Nkolbisson virus**                 | <i>Nkolbisson ledantevirus</i>   | <i>Ledantevirus</i>    | <i>Rhabdoviridae</i> | ssRN A(-)   | NC_03 4539                      | Com plete geno me | ? | 2010 | Unknown (Dacheux et al., 2010)      | Cameroon (Dacheux et al., 2010)                                                                                     |

|                                |                         |                        |                         |           |                                                                             |                 |   |                               |                                           |                                                                                                                                                       |
|--------------------------------|-------------------------|------------------------|-------------------------|-----------|-----------------------------------------------------------------------------|-----------------|---|-------------------------------|-------------------------------------------|-------------------------------------------------------------------------------------------------------------------------------------------------------|
| Spring viremia of carp virus** | <i>Carp sprivivirus</i> | <i>Sprivivirus</i>     | <i>Rhabdoviridae</i>    | ssRN A(-) | NC_002803                                                                   | Complete genome | ? | 1996 (Bjorklund et al., 1996) | Unknown (Temmam et al., 2019)             | Austria, China, Czech Republic, Denmark, Hungary, Iran, Italy, Mexico, Moldova, Poland, Serbia, South Korea, Ukraine, UK, USA (Marsella et al., 2021) |
| Maraba virus**                 | <i>Maraba virus</i>     | <i>Vesiculovirus</i>   | <i>Rhabdoviridae</i>    | ssRN A(-) | NC_025255                                                                   | Complete genome | ? | 2010 (Brun et al., 2010)      | Unknown (Temmam et al., 2019)             | Brazil (Brun et al., 2010)                                                                                                                            |
| Wellfleet Bay virus**          | Unclassified            | <i>Quarantaviruses</i> | <i>Orthomyxoviridae</i> | ssRN A(-) | NC_025793, NC_025794, NC_025795, NC_025796, NC_025797, NC_025798, NC_025799 | Complete genome | ? | 2015 (Allison et al., 2015)   | Unknown (Temmam et al., 2019)             | USA (Allison et al., 2015)                                                                                                                            |
| Araguari virus**               | Unclassified            | <i>Thogotovirus</i>    | <i>Orthomyxoviridae</i> | ssRN A(-) | KX670389, KX670390, KX670391, KX670392, KX670393, KX670394,                 | Complete genome | ? | 1969 (Silva et al., 2005)     | Unknown tick vectors (Silva et al., 2005) | Brazil (Silva et al., 2005)                                                                                                                           |

| KX670                                   |              |                   |                       |           |                |                   |   |      |                                               |                                               |
|-----------------------------------------|--------------|-------------------|-----------------------|-----------|----------------|-------------------|---|------|-----------------------------------------------|-----------------------------------------------|
| 395                                     |              |                   |                       |           |                |                   |   |      |                                               |                                               |
| Eelpout rhabdovirus**                   | Unclassified | Unclassified      | <i>Rhabdovirid ae</i> | ssRN A(-) | KR612 230      | Parti al          | ? | 2017 | Unknown (Axen et al., 2017)                   | Sweden (Axen et al., 2017)                    |
| Wuhan redfin culter dimarhabo dovirus** | Unclassified | Unclassified      | <i>Rhabdovirid ae</i> | ssRN A(-) | MG600 013      | Com plete geno me | ? | 2018 | Unknown (Shi et al., 2018)                    | China (Shi et al., 2018)                      |
| Bat nairovirus/Ahun nairovirus*         | Unclassified | <i>Nairovirus</i> | <i>Nairovirida e</i>  | ssRN A(-) | KF1702 24      | Parti al geno me  | ? | 2014 | Unknown (Dacheux et al., 2014)                | France (Dacheux et al., 2014)                 |
| Essaouira virus**                       | Unclassified | Unclassified      | Unclassified          | Unkn own  | Not availab le | Not availa ble    | ? | 1993 | <i>O. maritimus</i> (Chastel et al., 1993)    | Morocco (Chastel et al., 1993)                |
| Huacho virus**                          | Unclassified | Unclassified      | Unclassified          | Unkn own  | Not availab le | Not availa ble    | ? | 1967 | <i>C. amblus</i> (Belaganahalli et al., 2015) | Peru (Belaganahalli et al., 2015)             |
| Kala Iris virus**                       | Unclassified | Unclassified      | Unclassified          | Unkn own  | Not availab le | Not availa ble    | ? | 1993 | <i>O. maritimus</i> (Chastel et al., 1993)    | Morocco (Chastel et al., 1993)                |
| Mono Lake virus**                       | Unclassified | Unclassified      | Unclassified          | Unkn own  | Not availab le | Not availa ble    | ? | 1988 | <i>A. cooleyi</i> (Calisher et al., 1988)     | USA (Calisher et al., 1988)                   |
| Sixgun city virus**                     | Unclassified | Unclassified      | Unclassified          | Unkn own  | Not availab le | Not availa ble    | ? | 1988 | <i>A. cooleyi</i> (Calisher et al., 1988)     | USA (Calisher et al., 1988)                   |
| Ellidaey virus**                        | Unclassified | Unclassified      | Unclassified          | Unkn own  | Not availab le | Not availa ble    | ? | 1986 | <i>I. uriae</i> (Moss et al., 1986)           | Iceland (Ellidaey island) (Moss et al., 1986) |

|                            |              |              |              |             |                      |                      |   |                                           |                                                      |                                                                |
|----------------------------|--------------|--------------|--------------|-------------|----------------------|----------------------|---|-------------------------------------------|------------------------------------------------------|----------------------------------------------------------------|
| Foula virus**              | Unclassified | Unclassified | Unclassified | Unkn<br>own | Not<br>availab<br>le | Not<br>availa<br>ble | ? | 1986<br>(Nuttal<br>l et al.,<br>1986)     | <i>I. uriae</i><br>(Nuttall et<br>al., 1986)         | Scotland<br>(Shetland<br>Islands)<br>(Nuttall et<br>al., 1986) |
| Grimsey virus**            | Unclassified | Unclassified | Unclassified | Unkn<br>own | Not<br>availab<br>le | Not<br>availa<br>ble | ? | 1986<br>(Moss<br>et al.,<br>1986)         | <i>I. uriae</i><br>(Moss et<br>al., 1986)            | Iceland<br>(Grimsey<br>island)<br>(Moss et al.,<br>1986)       |
| Inner Farne Island virus** | Unclassified | Unclassified | Unclassified | Unkn<br>own | Not<br>availab<br>le | Not<br>availa<br>ble | ? | 1986<br>(Nuttal<br>l et al.,<br>1986)     | <i>I. uriae</i><br>(Nuttall et<br>al., 1986)         | England<br>(Nuttall et<br>al., 1986)                           |
| Mykines virus**            | Unclassified | Unclassified | Unclassified | Unkn<br>own | Not<br>availab<br>le | Not<br>availa<br>ble | ? | 1978<br>(Main<br>et al.,<br>1978)         | <i>I. uriae</i><br>(Main et<br>al., 1978)            | Denmark<br>(Faroe<br>Islands)<br>(Main et al.,<br>1978)        |
| Kao Shuan virus**          | Unclassified | Unclassified | Unclassified | Unkn<br>own | Unavai<br>lable      | Not<br>availa<br>ble | ? | 1989<br>(Mous<br>sa et<br>al.,<br>1989)   | <i>A. robertsi</i><br>(Moussa et<br>al., 1989)       | Indonesia,<br>Taiwan<br>(Moussa et<br>al., 1989)               |
| Pretoria virus**           | Unclassified | Unclassified | Unclassified | Unkn<br>own | Not<br>availab<br>le | Not<br>availa<br>ble | ? | 1975<br>(Conve<br>rse et<br>al.,<br>1975) | <i>A. africanum</i><br>(Converse<br>et al.,<br>1975) | South Africa<br>(Converse et<br>al., 1975)                     |
| Puffin Island virus**      | Unclassified | Unclassified | Unclassified | Unkn<br>own | Not<br>availab<br>le | Not<br>availa<br>ble | ? | 1983<br>(Gould<br>et al.,<br>1983)        | <i>O. maritimus</i><br>(Gould et<br>al., 1983)       | Puffin Island<br>(Gould et al.,<br>1983)                       |
| Seletar virus**            | Unclassified | Unclassified | Unclassified | Unkn<br>own | Not<br>availab<br>le | Not<br>availa<br>ble | ? | 1961<br>(Shi et<br>al.,<br>2018)          | <i>B. microplus</i><br>(Shi et al.,<br>2018)         | Malaysia,<br>Singapore<br>(Shi et al.,<br>2018)                |

\* *Amblyomma dissimile* mivirus, Nuomin virus, and Granville quaranjavirus were later added tick-borne viruses which were not included in the original tick virus database.

\*\* Viruses with unknown tick vectors or that sequences unavailable.



Acronyms: *Argas* (A.); *Amblyomma* (Am.); *Boophilus* (B.); *Dermacentor* (D.); *Haemaphysalis* (H.); *Hyalomma* (Hy.); *Ixodes* (I.); *Ornithodoros* (O.); *Otobius* (Ot.); *Rhipicephalus* (R.).

---

---

**Appendix Table 2.** Putative novel RNV viral contigs identified in this study.

| Putative novel viral contig  | Genbank ID                    | Tick species                             | Provisional family | Genome structure | Sequence length (nt) | Closest BLASTn match (e-value 0.005) | Sequence identity (%) | Notes                                                                                                                                                                                                                       | Reference                                                 |
|------------------------------|-------------------------------|------------------------------------------|--------------------|------------------|----------------------|--------------------------------------|-----------------------|-----------------------------------------------------------------------------------------------------------------------------------------------------------------------------------------------------------------------------|-----------------------------------------------------------|
| Alphatetra-like tick virus 1 | GIXL01013119.1                | <i>Ixodes ricinus</i>                    | Alphatetraviridae  | ssRNA(+)         | 5496                 | Bulatov virus (MT025173.1)           | 78                    | One putative ORF; predicted protein contains homologs of RdRp 2 (PF00978) motif, nucleoside triphosphate hydrolase (SSF52540), viral (Superfamily 1) RNA helicase (PF01443) and viral methyltransferase 3 (PF01660) motifs. | Trentalman <i>et al.</i> 2020, 10.1038/s41598-020-76268-y |
| Alphatetra-like tick virus 2 | GBXQ01012426.1                | <i>Ixodes persulcatus</i>                | Alphatetraviridae  | ssRNA(+)         | 1056                 | Vovk virus (MN830235.1)              | 81                    | One putative ORF; predicted protein contains homologs of RdRp 2 (PF00978) motif.                                                                                                                                            | Zhang 2014, Unpublished                                   |
| Alphatetra-like tick virus 3 | GIXP02005464.1                | <i>Ornithodoros moubata</i>              | Alphatetraviridae  | ssRNA(+)         | 5452                 | Bulatov virus (MT025173.1)           | 86                    | One putative ORF; predicted protein contains homologs of RdRp 2 (PF00978) motif, nucleoside triphosphate hydrolase (SSF52540), viral (Superfamily 1) RNA helicase (PF01443) and viral methyltransferase 3 (PF01660) motifs. | Oleaga <i>et al.</i> 2021, 10.1371/journal.pntd.009105    |
| Alphatetra-like tick virus 4 | GFJQ02007921.1                | <i>Ornithodoros moubata</i>              | Alphatetraviridae  | ssRNA(+)         | 3873                 | Bulatov virus (MT025173.1)           | 67                    | One putative ORF; predicted protein contains homologs of RdRp 2 (PF00978) motif, nucleoside triphosphate hydrolase (SSF52540) and viral (Superfamily 1) RNA helicase (PF01443) motifs.                                      | Oleaga <i>et al.</i> 2017, 10.1016/j.ttbdis.2017.05.002   |
| Alphatetra-like tick virus 5 | GEMR01004364.1                | <i>Rhipicephalus microplus</i>           | Alphatetraviridae  | ssRNA(+)         | 1488                 | Hepelivirales sp. (MW722078.1)       | 73                    | One putative ORF; predicted protein contains homologs of RdRp 2 (PF00978) motif.                                                                                                                                            | Munoz <i>et al.</i> 2017, 10.1371/journal.pone.0172326    |
| Orthomyxo-like tick virus 1  | HACP01027211 (HACW01024387.1) | <i>Rhipicephalus sanguineus</i>          | Orthomyxoviridae   | ssRNA(-)         | 2136                 | Zambezi tick virus 1 (MH267793.1)    | 77                    | One putative ORF; predicted protein contains homologs of Influenza RdRp subunit PB1 (PF00602) motif.                                                                                                                        | De Marco <i>et al.</i> 2015, Unpublished                  |
| Orthomyxo-like tick virus 2  | HACP01022575.1                | <i>Rhipicephalus sanguineus</i>          | Orthomyxoviridae   | ssRNA(-)         | 1290                 | Zambezi tick virus 1 (MH267793.1)    | 77                    | One putative ORF; predicted protein contains homologs of Influenza RdRp subunit PB1 (PF00602) motif.                                                                                                                        | De Marco <i>et al.</i> 2015, Unpublished                  |
| Orthomyxo-like tick virus 3  | HACW01018819.1                | <i>Rhipicephalus sanguineus</i>          | Orthomyxoviridae   | ssRNA(-)         | 1290                 | Zambezi tick virus 1 (MH267793.1)    | 77                    | One putative ORF; predicted protein contains homologs of Influenza RdRp subunit PB1 (PF00602) motif.                                                                                                                        | De Marco <i>et al.</i> 2015, Unpublished                  |
| Orthomyxo-like tick virus 4  | GIIA01018702.1                | <i>Rhipicephalus haemaphysalis oides</i> | Orthomyxoviridae   | ssRNA(-)         | 2357                 | Zambezi tick virus 1 (MH267793.1)    | 77                    | One putative ORF; predicted protein contains homologs of                                                                                                                                                                    | Wang <i>et al.</i> 2020, 10.3389/fcimb.2020.0093          |

---

---

|                             |                    |                                    |            |              |     |                                          |    |                                                                     |                                                |                     |                    |
|-----------------------------|--------------------|------------------------------------|------------|--------------|-----|------------------------------------------|----|---------------------------------------------------------------------|------------------------------------------------|---------------------|--------------------|
|                             |                    |                                    |            |              |     |                                          |    |                                                                     | Influenza RdRp subunit<br>PB1 (PF00602) motif. |                     |                    |
| Chu-like<br>tick virus<br>1 | GGIX01201876<br>.1 | <i>Ixodes</i><br><i>scapularis</i> | Chuviridae | ssRNA(<br>-) | 728 | Bole tick virus<br>3<br>(MH688550.<br>1) | 87 | One<br>predicted<br>contains<br>Mononegavirales<br>(PF00946) motif. | putative<br>protein<br>homologs of<br>RdRp     | ORF;<br>Unpublished | Robertson<br>2016, |

---

**Appendix Table 3.** Putative novel RNA viral contigs that represent defective viruses.

| SRA project ID         | Tick species         | Provisional family | Genome structure | Sequence length (nt) | Closest BLASTn match (e-value 0.005) | Sequence identity (%) | Reference                                          |
|------------------------|----------------------|--------------------|------------------|----------------------|--------------------------------------|-----------------------|----------------------------------------------------|
| SRR10549473.54432.1    | <i>Hy. asiaticum</i> | <i>Chuviridae</i>  | ssRNA(-)         | 4383                 | Bole tick virus 3 (MH688550.1)       | 84                    | Yuan <i>et al.</i> 2020, 10.1016/j.jip.2020.107481 |
| SRR10549473.681872.1   | <i>Hy. asiaticum</i> | <i>Chuviridae</i>  | ssRNA(-)         | 4528                 | Bole tick virus 3 (MH688550.1)       | 82                    | Yuan <i>et al.</i> 2020, 10.1016/j.jip.2020.107481 |
| SRR10549473.681877.1   | <i>Hy. asiaticum</i> | <i>Chuviridae</i>  | ssRNA(-)         | 4420                 | Bole tick virus 3 (MH688550.1)       | 84                    | Yuan <i>et al.</i> 2020, 10.1016/j.jip.2020.107481 |
| SRR10549473.681878.1   | <i>Hy. asiaticum</i> | <i>Chuviridae</i>  | ssRNA(-)         | 4440                 | Bole tick virus 3 (MH688550.1)       | 86                    | Yuan <i>et al.</i> 2020, 10.1016/j.jip.2020.107481 |
| SRR10549473.779074.1   | <i>Hy. asiaticum</i> | <i>Chuviridae</i>  | ssRNA(-)         | 5286                 | Bole tick virus 3 (MH688550.1)       | 84                    | Yuan <i>et al.</i> 2020, 10.1016/j.jip.2020.107481 |
| SRR10549473.779079.1   | <i>Hy. asiaticum</i> | <i>Chuviridae</i>  | ssRNA(-)         | 5379                 | Bole tick virus 3 (MH688550.1)       | 85                    | Yuan <i>et al.</i> 2020, 10.1016/j.jip.2020.107481 |
| SRR10549473.779081.1   | <i>Hy. asiaticum</i> | <i>Chuviridae</i>  | ssRNA(-)         | 5334                 | Bole tick virus 3 (MH688550.1)       | 83                    | Yuan <i>et al.</i> 2020, 10.1016/j.jip.2020.107481 |
| SRR10549473.1447289.1  | <i>Hy. asiaticum</i> | <i>Chuviridae</i>  | ssRNA(-)         | 5272                 | Bole tick virus 3 (MH688550.1)       | 85                    | Yuan <i>et al.</i> 2020, 10.1016/j.jip.2020.107481 |
| SRR10549473.1447293.1  | <i>Hy. asiaticum</i> | <i>Chuviridae</i>  | ssRNA(-)         | 5001                 | Bole tick virus 3 (MH688550.1)       | 87                    | Yuan <i>et al.</i> 2020, 10.1016/j.jip.2020.107481 |
| SRR10549473.2865317.1  | <i>Hy. asiaticum</i> | <i>Chuviridae</i>  | ssRNA(-)         | 5556                 | Bole tick virus 3 (MH688550.1)       | 83                    | Yuan <i>et al.</i> 2020, 10.1016/j.jip.2020.107481 |
| SRR10549473.2865320.1  | <i>Hy. asiaticum</i> | <i>Chuviridae</i>  | ssRNA(-)         | 5643                 | Bole tick virus 3 (MH688550.1)       | 87                    | Yuan <i>et al.</i> 2020, 10.1016/j.jip.2020.107481 |
| SRR10549473.4598504.1  | <i>Hy. asiaticum</i> | <i>Chuviridae</i>  | ssRNA(-)         | 8170                 | Bole tick virus 3 (MH688550.1)       | 88                    | Yuan <i>et al.</i> 2020, 10.1016/j.jip.2020.107481 |
| SRR10549473.4598510.1  | <i>Hy. asiaticum</i> | <i>Chuviridae</i>  | ssRNA(-)         | 8206                 | Bole tick virus 3 (MH688550.1)       | 87                    | Yuan <i>et al.</i> 2020, 10.1016/j.jip.2020.107481 |
| SRR10549473.4598511.1  | <i>Hy. asiaticum</i> | <i>Chuviridae</i>  | ssRNA(-)         | 8182                 | Bole tick virus 3 (MH688550.1)       | 85                    | Yuan <i>et al.</i> 2020, 10.1016/j.jip.2020.107481 |
| SRR10549473.7000060.1  | <i>Hy. asiaticum</i> | <i>Chuviridae</i>  | ssRNA(-)         | 4986                 | Bole tick virus 3 (MH688550.1)       | 84                    | Yuan <i>et al.</i> 2020, 10.1016/j.jip.2020.107481 |
| SRR10549473.10341027.1 | <i>Hy. asiaticum</i> | <i>Chuviridae</i>  | ssRNA(-)         | 2448                 | Bole tick virus 3 (MH688550.1)       | 86                    | Yuan <i>et al.</i> 2020, 10.1016/j.jip.2020.107481 |
| SRR10549473.10526706.1 | <i>Hy. asiaticum</i> | <i>Chuviridae</i>  | ssRNA(-)         | 6273                 | Bole tick virus 3 (MH688550.1)       | 87                    | Yuan <i>et al.</i> 2020, 10.1016/j.jip.2020.107481 |
| SRR10549473.10526708.1 | <i>Hy. asiaticum</i> | <i>Chuviridae</i>  | ssRNA(-)         | 6276                 | Nuomin virus (MW029964.1)            | 78                    | Yuan <i>et al.</i> 2020, 10.1016/j.jip.2020.107481 |
| SRR17281102.635386.1   | <i>I. scapularis</i> | <i>Chuviridae</i>  | ssRNA(-)         | 1390                 | Suffolk virus (NC_028243.1)          | 78                    | University of Minnesota 2021, Unpublished          |

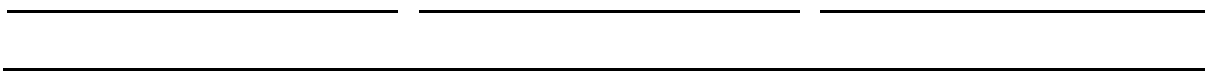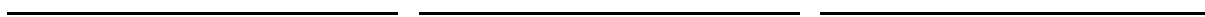

**Appendix Table 4.** DNA viral contigs found after bioinformatic checking.

| WGS project ID     | Tick species                 | Genome structure | Sequence length (bp) | Predicted protein                                                                                                                                                                                                   | Reference                                               |
|--------------------|------------------------------|------------------|----------------------|---------------------------------------------------------------------------------------------------------------------------------------------------------------------------------------------------------------------|---------------------------------------------------------|
| GIXP02029293.1     | <i>Ornithodoros moubata</i>  | dsDNA            | 2232                 | DdRp subunit 3 (encoded by <i>H359L</i> ); ATP-dependent RNA helicase (encoded by <i>Q706L</i> ); ATP-dependent RNA helicase (encoded by <i>QP509L</i> )                                                            | Oleaga <i>et al.</i> 2021, 10.1371/journal.pntd.0009105 |
| GIXP02006837.1     | <i>Ornithodoros moubata</i>  | dsDNA            | 1450                 | DdRp subunit 3 (encoded by <i>H359L</i> ); Uncharacterized protein (encoded by <i>H171R</i> )                                                                                                                       | Oleaga <i>et al.</i> 2021, 10.1371/journal.pntd.0009105 |
| CAJHNL01000000 2.1 | <i>Ornithodoros porcinus</i> | dsDNA            | 7421                 | DdRp subunit 2 (encoded by <i>EP1242L</i> ); Helicase (encoded by <i>F1055L</i> )                                                                                                                                   | Forth <i>et al.</i> 2020, 10.1186/s12915-020-00865-6    |
| CAJHNL01000000 3.1 | <i>Ornithodoros porcinus</i> | dsDNA            | 6757                 | Transcription factor SII homolog (encoded by <i>I243L</i> ); p1226R; RPB7 homolog; Uncharacterized protein (encoded by <i>D339L</i> ); Uncharacterized protein (encoded by <i>D129L</i> )                           | Forth <i>et al.</i> 2020, 10.1186/s12915-020-00865-6    |
| CAJHNL01000000 4.1 | <i>Ornithodoros porcinus</i> | dsDNA            | 6577                 | Primase (encoded by <i>C962R</i> )                                                                                                                                                                                  | Forth <i>et al.</i> 2020, 10.1186/s12915-020-00865-6    |
| CAJHNL01000000 5.1 | <i>Ornithodoros porcinus</i> | dsDNA            | 3455                 | TATA-binding protein (encoded by <i>B263R</i> )                                                                                                                                                                     | Forth <i>et al.</i> 2020, 10.1186/s12915-020-00865-6    |
| CAJHNL01000000 6.1 | <i>Ornithodoros porcinus</i> | dsDNA            | 3089                 | DdRp subunit 2 (encoded by <i>EP1242L</i> )                                                                                                                                                                         | Forth <i>et al.</i> 2020, 10.1186/s12915-020-00865-6    |
| CAJHNL01000000 7.1 | <i>Ornithodoros porcinus</i> | dsDNA            | 1557                 | DdDp (encoded by <i>G1211R</i> )                                                                                                                                                                                    | Forth <i>et al.</i> 2020, 10.1186/s12915-020-00865-6    |
| CAJHNL01000000 8.1 | <i>Ornithodoros porcinus</i> | dsDNA            | 629                  | Ribonucleotide reductase large subunit (encoded by <i>F778R</i> ); Uncharacterized protein p360 15R                                                                                                                 | Forth <i>et al.</i> 2020, 10.1186/s12915-020-00865-6    |
| CAJHNP01000000 2.1 | <i>Ornithodoros moubata</i>  | dsDNA            | 7383                 | DdRp subunit 2 (encoded by <i>EP1242L</i> ); Ribonucleotide reductase large subunit (encoded by <i>F778R</i> ); Helicase (encoded by <i>F1055L</i> )                                                                | Forth <i>et al.</i> 2020, 10.1186/s12915-020-00865-6    |
| CAJHNP01000000 4.1 | <i>Ornithodoros moubata</i>  | dsDNA            | 670                  | DdRp subunit 3 (encoded by <i>H359L</i> )                                                                                                                                                                           | Forth <i>et al.</i> 2020, 10.1186/s12915-020-00865-6    |
| CAJHNP01000000 5.1 | <i>Ornithodoros moubata</i>  | dsDNA            | 5156                 | Viral histone-like protein (encoded by <i>A104R</i> ); Inhibitor of apoptosis protein (encoded by <i>A224L</i> ); Thymidylate kinase (encoded by <i>A240L</i> ); Uncharacterized protein (encoded by <i>A151R</i> ) | Forth <i>et al.</i> 2020, 10.1186/s12915-020-00865-6    |
| CAJHNP01000000 6.1 | <i>Ornithodoros moubata</i>  | dsDNA            | 3634                 | DdRp subunit 3 (encoded by <i>H359L</i> ); Uncharacterized protein <i>CP123L</i> ; ATP-dependent RNA helicase (encoded by <i>QP509L</i> ); DNA topoisomerase 2 (encoded by <i>P1192R</i> )                          | Forth <i>et al.</i> 2020, 10.1186/s12915-020-00865-6    |
| CAJHNP01000000 7.1 | <i>Ornithodoros moubata</i>  | dsDNA            | 2713                 | Early transcription factor large subunit (encoded by <i>D1133L</i> ); Uncharacterized protein (encoded by <i>H124R</i> ); Uncharacterized protein (encoded by <i>H171R</i> )                                        | Forth <i>et al.</i> 2020, 10.1186/s12915-020-00865-6    |
| CAJHNP01000001 7.1 | <i>Ornithodoros moubata</i>  | dsDNA            | 1007                 | Primase (encoded by <i>C962R</i> )                                                                                                                                                                                  | Forth <i>et al.</i> 2020, 10.1186/s12915-020-00865-6    |
| CAJHNQ0100000 10.1 | <i>Ornithodoros moubata</i>  | dsDNA            | 636                  | DdRp subunit 2 (encoded by <i>EP1242L</i> )                                                                                                                                                                         | Forth <i>et al.</i> 2020, 10.1186/s12915-020-00865-6    |
| CAJHNQ0100000 14.1 | <i>Ornithodoros moubata</i>  | dsDNA            | 679                  | DdRp subunit 2 (encoded by <i>EP1242L</i> ); Ribonucleotide reductase large subunit (encoded by <i>F778R</i> ); Helicase (encoded by <i>F1055L</i> )                                                                | Forth <i>et al.</i> 2020, 10.1186/s12915-020-00865-6    |
| CAJHNQ0100000 15.1 | <i>Ornithodoros moubata</i>  | dsDNA            | 1193                 | Helicase (encoded by <i>F1055L</i> )                                                                                                                                                                                | Forth <i>et al.</i> 2020, 10.1186/s12915-020-00865-6    |
| CAJHNQ0100000 16.1 | <i>Ornithodoros moubata</i>  | dsDNA            | 1697                 | DdRp subunit 2 (encoded by <i>EP1242L</i> ); Helicase (encoded by <i>F1055L</i> )                                                                                                                                   | Forth <i>et al.</i> 2020, 10.1186/s12915-020-00865-6    |
| CAJHNR01000000 4.1 | <i>Ornithodoros moubata</i>  | dsDNA            | 16841                | DdRp subunit 2 (encoded by <i>EP1242L</i> ); Ribonucleotide reductase large subunit (encoded by <i>F778R</i> ); Helicase (encoded by <i>F1055L</i> )                                                                | Forth <i>et al.</i> 2020, 10.1186/s12915-020-00865-6    |
| CAJHNR01000000 5.1 | <i>Ornithodoros moubata</i>  | dsDNA            | 15286                | TATA-binding protein (encoded by <i>B263R</i> )                                                                                                                                                                     | Forth <i>et al.</i> 2020, 10.1186/s12915-020-00865-6    |
| CAJHNR01000000 6.1 | <i>Ornithodoros moubata</i>  | dsDNA            | 13138                | TATA-binding protein (encoded by <i>B263R</i> )                                                                                                                                                                     | Forth <i>et al.</i> 2020, 10.1186/s12915-020-00865-6    |

|                       |                              |       |      |                                                                                                                                                                                                               |                                               |
|-----------------------|------------------------------|-------|------|---------------------------------------------------------------------------------------------------------------------------------------------------------------------------------------------------------------|-----------------------------------------------|
| CAJHNR01000001<br>1.1 | <i>Ornithodoros moubata</i>  | dsDNA | 8352 | Helicase (encoded by <i>A859L</i> ); Uncharacterized protein p360 15R; Uncharacterized protein 5ELp28; IκB-like protein (encoded by <i>A238L</i> )                                                            | Forth et al. 2020, 10.1186/s12915-020-00865-6 |
| CAJHNR01000001<br>3.1 | <i>Ornithodoros moubata</i>  | dsDNA | 7718 | Early transcription factor large subunit (encoded by <i>D1133L</i> ); DdRp subunit 3 (encoded by <i>H359L</i> ); Uncharacterized protein H171R                                                                | Forth et al. 2020, 10.1186/s12915-020-00865-6 |
| CAJHNR01000001<br>4.1 | <i>Ornithodoros moubata</i>  | dsDNA | 7045 | TATA-binding protein (encoded by <i>B263R</i> )                                                                                                                                                               | Forth et al. 2020, 10.1186/s12915-020-00865-6 |
| CAJHNR01000001<br>5.1 | <i>Ornithodoros moubata</i>  | dsDNA | 6370 | TATA-binding protein (encoded by <i>B263R</i> ); Early transcription factor large subunit (encoded by <i>G1340L</i> ); Primase (encoded by <i>C962R</i> )                                                     | Forth et al. 2020, 10.1186/s12915-020-00865-6 |
| CAJHNR01000001<br>6.1 | <i>Ornithodoros moubata</i>  | dsDNA | 5808 | TATA-binding protein (encoded by <i>B263R</i> )                                                                                                                                                               | Forth et al. 2020, 10.1186/s12915-020-00865-6 |
| CAJHNR01000001<br>7.1 | <i>Ornithodoros moubata</i>  | dsDNA | 5688 | TATA-binding protein (encoded by <i>B263R</i> )                                                                                                                                                               | Forth et al. 2020, 10.1186/s12915-020-00865-6 |
| CAJHNR01000001<br>8.1 | <i>Ornithodoros moubata</i>  | dsDNA | 5489 | DdRp subunit 3 (encoded by <i>H359L</i> ); Uncharacterized protein (encoded by <i>CP123L</i> ); DNA topoisomerase II (encoded by <i>P1192R</i> )                                                              | Forth et al. 2020, 10.1186/s12915-020-00865-6 |
| CAJHNR01000001<br>9.1 | <i>Ornithodoros moubata</i>  | dsDNA | 5396 | Uncharacterized protein p360 15R                                                                                                                                                                              | Forth et al. 2020, 10.1186/s12915-020-00865-6 |
| CAJHNR01000002<br>0.1 | <i>Ornithodoros moubata</i>  | dsDNA | 5152 | Histone-like protein (encoded by <i>A104R</i> ); Inhibitor of apoptosis protein (encoded by <i>A224L</i> ); Thymidylate kinase (encoded by <i>A240L</i> ); Uncharacterized protein (encoded by <i>A151R</i> ) | Forth et al. 2020, 10.1186/s12915-020-00865-6 |
| CAJHNR01000002<br>1.1 | <i>Ornithodoros moubata</i>  | dsDNA | 4920 | DdRp subunit 10 (encoded by <i>CP80R</i> ); Uncharacterized protein (encoded by <i>CP312R</i> )                                                                                                               | Forth et al. 2020, 10.1186/s12915-020-00865-6 |
| CAJHNR01000002<br>3.1 | <i>Ornithodoros moubata</i>  | dsDNA | 4152 | Primase (encoded by <i>C962R</i> )                                                                                                                                                                            | Forth et al. 2020, 10.1186/s12915-020-00865-6 |
| CAJHNR01000002<br>4.1 | <i>Ornithodoros moubata</i>  | dsDNA | 3824 | DdRp subunit 2 (encoded by <i>EP1242L</i> ); Transmembrane protein (encoded by <i>EP84R</i> )                                                                                                                 | Forth et al. 2020, 10.1186/s12915-020-00865-6 |
| CAJHNR01000002<br>5.1 | <i>Ornithodoros moubata</i>  | dsDNA | 3339 | DdRp subunit 2 (encoded by <i>EP1242L</i> )                                                                                                                                                                   | Forth et al. 2020, 10.1186/s12915-020-00865-6 |
| CAJHNR01000002<br>6.1 | <i>Ornithodoros moubata</i>  | dsDNA | 2712 | DdRp subunit 2 (encoded by <i>EP1242L</i> )                                                                                                                                                                   | Forth et al. 2020, 10.1186/s12915-020-00865-6 |
| CAJHNR01000002<br>7.1 | <i>Ornithodoros moubata</i>  | dsDNA | 2653 | Putative poly(A) polymerase catalytic subunit (encoded by <i>C475L</i> ); Primase (encoded by <i>C962R</i> )                                                                                                  | Forth et al. 2020, 10.1186/s12915-020-00865-6 |
| CAJHNR01000002<br>8.1 | <i>Ornithodoros moubata</i>  | dsDNA | 2475 | DdRp subunit 3 (encoded by <i>H359L</i> )                                                                                                                                                                     | Forth et al. 2020, 10.1186/s12915-020-00865-6 |
| CAJHNR01000002<br>9.1 | <i>Ornithodoros moubata</i>  | dsDNA | 2196 | Ribonucleotide reductase large subunit (encoded by <i>F778R</i> )                                                                                                                                             | Forth et al. 2020, 10.1186/s12915-020-00865-6 |
| CAJHNR01000003<br>0.1 | <i>Ornithodoros moubata</i>  | dsDNA | 2179 | Uncharacterized protein (encoded by <i>CP123L</i> ); mRNA-capping enzyme (encoded by <i>NP868R</i> )                                                                                                          | Forth et al. 2020, 10.1186/s12915-020-00865-6 |
| CAJHNR01000003<br>2.1 | <i>Ornithodoros moubata</i>  | dsDNA | 1763 | Ribonucleotide reductase large subunit (encoded by <i>F778R</i> )                                                                                                                                             | Forth et al. 2020, 10.1186/s12915-020-00865-6 |
| CAJHNS01000002<br>6.1 | <i>Ornithodoros moubata</i>  | dsDNA | 1078 | Helicase (encoded by <i>F1055L</i> )                                                                                                                                                                          | Forth et al. 2020, 10.1186/s12915-020-00865-6 |
| CAJHNU01000000<br>2.1 | <i>Ornithodoros porcinus</i> | dsDNA | 3380 | DdRp subunit 2 (encoded by <i>EP1242L</i> ); Helicase (encoded by <i>F1055L</i> )                                                                                                                             | Forth et al. 2020, 10.1186/s12915-020-00865-6 |
| CAJHNU01000000<br>3.1 | <i>Ornithodoros porcinus</i> | dsDNA | 641  | Ribonucleotide reductase large subunit (encoded by <i>F778R</i> )                                                                                                                                             | Forth et al. 2020, 10.1186/s12915-020-00865-6 |
| CAJHNU01000000<br>4.1 | <i>Ornithodoros porcinus</i> | dsDNA | 1803 | TATA-binding protein (encoded by <i>B263R</i> )                                                                                                                                                               | Forth et al. 2020, 10.1186/s12915-020-00865-6 |
| CAJHNU01000000<br>9.1 | <i>Ornithodoros porcinus</i> | dsDNA | 776  | Transcription factor S-II-related protein (encoded by <i>I243L</i> ); Late protein (encoded by <i>I226R</i> )                                                                                                 | Forth et al. 2020, 10.1186/s12915-020-00865-6 |
| CAJHNU01000001<br>1.1 | <i>Ornithodoros porcinus</i> | dsDNA | 2551 | Primase (encoded by <i>C962R</i> )                                                                                                                                                                            | Forth et al. 2020, 10.1186/s12915-020-00865-6 |
| CAJHNU01000001<br>4.1 | <i>Ornithodoros porcinus</i> | dsDNA | 3100 | DdRp subunit 2 (encoded by <i>EP1242L</i> )                                                                                                                                                                   | Forth et al. 2020, 10.1186/s12915-020-00865-6 |
| CAJHNV01000000<br>2.1 | <i>Ornithodoros porcinus</i> | dsDNA | 4758 | DdRp subunit 2 (encoded by <i>EP1242L</i> )                                                                                                                                                                   | Forth et al. 2020, 10.1186/s12915-020-00865-6 |

---

---

|                        |                                  |       |      |                                                                                                                                                            |                                               |
|------------------------|----------------------------------|-------|------|------------------------------------------------------------------------------------------------------------------------------------------------------------|-----------------------------------------------|
| CAJHNV01000000<br>4.1  | <i>Ornithodoros<br/>porcinus</i> | dsDNA | 3378 | Transcription factor SII homolog (encoded by <i>I243L</i> ); Late protein (encoded by <i>I226R</i> );<br>Uncharacterized protein (encoded by <i>D79L</i> ) | Forth et al. 2020, 10.1186/s12915-020-00865-6 |
| CAJHNV01000000<br>5.1  | <i>Ornithodoros<br/>porcinus</i> | dsDNA | 2605 | DdRp subunit 2 (encoded by <i>EP1242L</i> )                                                                                                                | Forth et al. 2020, 10.1186/s12915-020-00865-6 |
| CAJHNV01000000<br>7.1  | <i>Ornithodoros<br/>porcinus</i> | dsDNA | 777  | Transcription factor SII homolog (encoded by <i>I243L</i> )                                                                                                | Forth et al. 2020, 10.1186/s12915-020-00865-6 |
| CAJHNV01000000<br>16.1 | <i>Ornithodoros<br/>moubata</i>  | dsDNA | 1078 | Helicase (encoded by <i>F1055L</i> )                                                                                                                       | Forth et al. 2020, 10.1186/s12915-020-00865-6 |

---

---



**Appendix Table 5.** GenBank ID of viruses phylogenetically related to the putative novel viral contigs. Zoonotic risks of virus sequences (in GenBank format) were predicted using the GCB model.

| Putative novel viral contigs  | Relative viral species                  | GenBank ID                                                                                |           |
|-------------------------------|-----------------------------------------|-------------------------------------------------------------------------------------------|-----------|
| Alphatetra-like viral contigs | <i>Nudaurelia capensis</i>              | NC_001990.1                                                                               |           |
|                               | <i>beta virus</i>                       | NC_005898.1; NC_005899.1                                                                  |           |
|                               | <i>Helicoverpa armigera stunt virus</i> | NC_001981.1; NC_001982.1                                                                  |           |
| Orthomyxo-like viral contigs  | <i>Wellfleet Bay virus</i>              | NC_025798.1; NC_025797.1; NC_025796.1; NC_025795.1; NC_025794.1; NC_025793.1; NC_025799.1 |           |
|                               | <i>Araguari virus</i>                   | KX670389.1; KX670390.1; KX670391.1; KX670392.1; KX670393.1; KX670394.1; KX670395.1        |           |
|                               | <i>Johnston Atoll quaranjavirus</i>     | NC_052931.1; NC_052930.1; NC_052929.1; NC_052928.1; NC_052927.1; NC_052926.1; NC_052925.1 |           |
|                               | <i>Lake Chad virus</i>                  | NC_052682.1; NC_052686.1; NC_052685.1; NC_052684.1; NC_052683.1; NC_052681.1; NC_052680.1 |           |
|                               | <i>Tjuloc virus</i>                     | JQ928941.1; JQ928942.1; JQ928943.1; JQ928944.1; JQ928945.1; JQ928946.1; MT774252.1        |           |
|                               | <i>Quaranfil quaranjavirus</i>          | NC_038821.1; NC_038822.1; NC_038820.1; NC_038819.1; NC_038818.1; NC_038817.1              |           |
|                               | Chu-like viral contigs                  | <i>Mivirus suffolkense</i>                                                                | NC_028243 |

**Appendix Table 6.** Zoonotic ranking of 136 known tick-borne viruses with complete genomes. Zoonotic risks of virus sequences (in GenBank format) were predicted using the GCB model.

| Virus name                                        | Predicted probability mean | Predicted probability lower | Predicted probability upper | Rank | Priority  |
|---------------------------------------------------|----------------------------|-----------------------------|-----------------------------|------|-----------|
| Tick-borne encephalitis virus                     | 0.777                      | 0.446                       | 0.946                       | 1    | Very high |
| Omsk hemorrhagic fever virus                      | 0.739                      | 0.443                       | 0.951                       | 2    | Very high |
| Powassan virus                                    | 0.695                      | 0.288                       | 0.920                       | 3    | High      |
| Isfahan virus                                     | 0.677                      | 0.233                       | 0.917                       | 4    | High      |
| Isfahan virus                                     | 0.677                      | 0.233                       | 0.917                       | 4    | High      |
| Uukuniemi virus                                   | 0.676                      | 0.262                       | 0.944                       | 5    | High      |
| Louping ill virus                                 | 0.668                      | 0.288                       | 0.890                       | 6    | High      |
| Langat virus                                      | 0.667                      | 0.339                       | 0.917                       | 7    | Very high |
| Thogoto virus                                     | 0.642                      | 0.266                       | 0.899                       | 8    | High      |
| Lonestar tick chuvirus 1                          | 0.619                      | 0.379                       | 0.857                       | 9    | Very high |
| Crimean-Congo hemorrhagic fever virus             | 0.609                      | 0.249                       | 0.875                       | 10   | High      |
| Grotenhout virus                                  | 0.601                      | 0.389                       | 0.808                       | 11   | Very high |
| Severe fever with thrombocytopenia syndrome virus | 0.596                      | 0.273                       | 0.849                       | 12   | High      |
| Kasokero virus                                    | 0.580                      | 0.180                       | 0.837                       | 13   | High      |
| Colorado tick fever virus                         | 0.562                      | 0.121                       | 0.854                       | 14   | High      |
| Quaranfil virus                                   | 0.561                      | 0.128                       | 0.863                       | 15   | High      |
| Great Island virus                                | 0.550                      | 0.115                       | 0.832                       | 16   | High      |
| Dugbe virus                                       | 0.540                      | 0.157                       | 0.825                       | 17   | High      |
| Johnston Atoll virus                              | 0.513                      | 0.311                       | 0.802                       | 18   | Very high |
| Dabieshan tick virus                              | 0.505                      | 0.289                       | 0.747                       | 19   | High      |
| Taggert virus                                     | 0.503                      | 0.318                       | 0.802                       | 20   | Very high |
| Blacklegged tick phlebovirus 1                    | 0.490                      | 0.271                       | 0.711                       | 21   | High      |
| Deer tick virus                                   | 0.486                      | 0.275                       | 0.703                       | 22   | High      |
| Tacheng tick virus 2                              | 0.482                      | 0.241                       | 0.774                       | 23   | High      |
| Lihan tick virus                                  | 0.481                      | 0.264                       | 0.730                       | 24   | High      |
| Karshi virus                                      | 0.481                      | 0.266                       | 0.954                       | 25   | High      |
| Alkhumra hemorrhagic fever virus                  | 0.469                      | 0.234                       | 0.736                       | 26   | High      |
| Yongjia tick virus 1                              | 0.441                      | 0.192                       | 0.680                       | 27   | High      |
| American dog tick phlebovirus                     | 0.438                      | 0.218                       | 0.659                       | 28   | High      |
| Wenzhou tick virus                                | 0.425                      | 0.234                       | 0.710                       | 29   | High      |
| Tamdy virus                                       | 0.413                      | 0.227                       | 0.642                       | 30   | High      |

---

|                           |      |       |       |       |    |        |
|---------------------------|------|-------|-------|-------|----|--------|
| Blacklegged rhabdovirus 1 | tick | 0.411 | 0.223 | 0.638 | 31 | High   |
| Tacheng tick virus 8      |      | 0.404 | 0.210 | 0.692 | 32 | High   |
| Jingmen tick virus        |      | 0.401 | 0.219 | 0.663 | 33 | High   |
| South Bay virus           |      | 0.395 | 0.210 | 0.630 | 34 | High   |
| Ngari virus               |      | 0.393 | 0.214 | 0.624 | 35 | High   |
| Kaisodi virus             |      | 0.392 | 0.208 | 0.590 | 36 | High   |
| Kupe virus                |      | 0.391 | 0.160 | 0.642 | 37 | High   |
| Lone star densovirus 1    | tick | 0.391 | 0.221 | 0.654 | 38 | High   |
| Blacklegged phlebovirus 3 | tick | 0.371 | 0.195 | 0.640 | 39 | High   |
| Pacific coast nairovirus  | tick | 0.370 | 0.197 | 0.656 | 40 | High   |
| Clo Mor virus             |      | 0.364 | 0.149 | 0.600 | 41 | High   |
| Sakhalin virus            |      | 0.345 | 0.177 | 0.657 | 42 | High   |
| Tyuleniy virus            |      | 0.340 | 0.160 | 0.739 | 43 | High   |
| Meram virus               |      | 0.335 | 0.196 | 0.574 | 44 | High   |
| Jos virus                 |      | 0.333 | 0.159 | 0.579 | 45 | High   |
| Midway virus              |      | 0.327 | 0.163 | 0.609 | 46 | High   |
| lone star virus           |      | 0.326 | 0.166 | 0.567 | 47 | High   |
| Norway phlebovirus 1      |      | 0.323 | 0.138 | 0.559 | 48 | High   |
| Tofla virus               |      | 0.323 | 0.198 | 0.601 | 49 | High   |
| Tacheng tick virus 7      |      | 0.318 | 0.175 | 0.511 | 50 | High   |
| New Minto virus           |      | 0.318 | 0.168 | 0.526 | 51 | High   |
| Bourbon virus             |      | 0.311 | 0.164 | 0.497 | 52 | High   |
| Suffolk virus             |      | 0.309 | 0.151 | 0.562 | 53 | High   |
| Silverwater virus         |      | 0.307 | 0.156 | 0.537 | 54 | High   |
| Heartland virus           |      | 0.305 | 0.135 | 0.520 | 55 | High   |
| Dera Ghazi Khan virus     |      | 0.299 | 0.150 | 0.493 | 56 | High   |
| Hunter Island virus       |      | 0.299 | 0.153 | 0.528 | 57 | High   |
| Great Saltee virus        |      | 0.299 | 0.168 | 0.543 | 58 | High   |
| Bhanja virus              |      | 0.298 | 0.161 | 0.446 | 59 | High   |
| Blanchseco virus          |      | 0.295 | 0.153 | 0.500 | 60 | High   |
| Thailand thogotovirus     | tick | 0.286 | 0.135 | 0.436 | 61 | Medium |
| Wuhan tick virus 1        |      | 0.280 | 0.145 | 0.461 | 62 | Medium |
| Gadgets Gully virus       |      | 0.277 | 0.152 | 0.583 | 63 | Medium |
| Soldado virus             |      | 0.277 | 0.164 | 0.450 | 64 | Medium |
| Abu Hammad virus          |      | 0.275 | 0.138 | 0.471 | 65 | Medium |
| Kadam virus               |      | 0.275 | 0.134 | 0.602 | 66 | Medium |
| Tacheng tick virus 1      |      | 0.272 | 0.134 | 0.514 | 67 | Medium |
| Zirqa virus               |      | 0.269 | 0.146 | 0.439 | 68 | Medium |
| Bole tick virus 2         |      | 0.267 | 0.141 | 0.466 | 69 | Medium |
| Qalyub virus              |      | 0.264 | 0.112 | 0.444 | 70 | Medium |

---

---

|                                 |       |       |       |     |        |
|---------------------------------|-------|-------|-------|-----|--------|
| Avalon virus                    | 0.259 | 0.119 | 0.449 | 71  | Medium |
| Genoa virus                     | 0.259 | 0.131 | 0.430 | 72  | Medium |
| Upolu virus                     | 0.258 | 0.130 | 0.419 | 73  | Medium |
| Blacklegged tick<br>chuvirus 2  | 0.258 | 0.137 | 0.453 | 74  | Medium |
| Long Island tick<br>rhabdovirus | 0.257 | 0.118 | 0.473 | 75  | Medium |
| Taishun tick virus              | 0.256 | 0.131 | 0.394 | 76  | Medium |
| Kemerovo virus                  | 0.255 | 0.100 | 0.425 | 77  | Medium |
| Wuhan tick virus 2              | 0.253 | 0.133 | 0.460 | 78  | Medium |
| Raza virus                      | 0.250 | 0.139 | 0.432 | 79  | Medium |
| Tillamook virus                 | 0.248 | 0.118 | 0.495 | 80  | Medium |
| New Kent County virus           | 0.246 | 0.132 | 0.359 | 81  | Medium |
| Issyk-kul virus                 | 0.235 | 0.105 | 0.343 | 82  | Medium |
| Zahedan rhabdovirus             | 0.234 | 0.119 | 0.386 | 83  | Medium |
| Tacheng tick virus 3            | 0.232 | 0.106 | 0.382 | 84  | Medium |
| Tunis virus                     | 0.232 | 0.105 | 0.369 | 85  | Medium |
| Tacheng tick virus 5            | 0.232 | 0.131 | 0.359 | 86  | Medium |
| Sawgrass virus                  | 0.231 | 0.122 | 0.403 | 87  | Medium |
| Changping tick virus 2          | 0.226 | 0.111 | 0.410 | 88  | Medium |
| Nyamanini virus                 | 0.222 | 0.123 | 0.394 | 89  | Medium |
| Dhori virus                     | 0.222 | 0.114 | 0.498 | 90  | Medium |
| Vinegar Hill virus              | 0.221 | 0.118 | 0.367 | 91  | Medium |
| Huangpi tick virus 3            | 0.217 | 0.106 | 0.347 | 92  | Medium |
| Huangpi tick virus 1            | 0.216 | 0.102 | 0.399 | 93  | Medium |
| Meaban virus                    | 0.216 | 0.100 | 0.445 | 94  | Medium |
| Hazara virus                    | 0.216 | 0.125 | 0.419 | 95  | Medium |
| Punta Salinas virus             | 0.212 | 0.102 | 0.433 | 96  | Medium |
| Wuhan mivirus                   | 0.212 | 0.108 | 0.382 | 97  | Medium |
| Laurel Lake virus               | 0.209 | 0.085 | 0.324 | 98  | Medium |
| Canine circovirus               | 0.208 | 0.101 | 0.361 | 99  | Medium |
| Matruh virus                    | 0.203 | 0.111 | 0.311 | 100 | Medium |
| Connecticut virus               | 0.201 | 0.098 | 0.376 | 101 | Medium |
| Sapphire II virus               | 0.197 | 0.098 | 0.319 | 102 | Medium |
| Tacheng tick virus 6            | 0.197 | 0.093 | 0.368 | 103 | Medium |
| Changping tick virus 3          | 0.195 | 0.085 | 0.331 | 104 | Medium |
| Saumarez Reef virus             | 0.194 | 0.098 | 0.371 | 105 | Medium |
| Abu Mina virus                  | 0.193 | 0.101 | 0.355 | 106 | Medium |
| Tarumizu tick virus             | 0.192 | 0.104 | 0.339 | 107 | Medium |
| Eyach virus                     | 0.192 | 0.103 | 0.362 | 108 | Medium |
| Barur virus                     | 0.191 | 0.091 | 0.347 | 109 | Medium |
| Bahig virus                     | 0.190 | 0.092 | 0.324 | 110 | Medium |
| Sierra Nevada virus             | 0.186 | 0.080 | 0.329 | 111 | Medium |

---

---

|                             |       |       |       |     |        |
|-----------------------------|-------|-------|-------|-----|--------|
| Wad Medani virus            | 0.186 | 0.105 | 0.401 | 112 | Medium |
| Kundal virus                | 0.184 | 0.095 | 0.312 | 113 | Medium |
| Chobar Gorge virus          | 0.178 | 0.096 | 0.337 | 114 | Medium |
| African swine fever virus   | 0.175 | 0.082 | 0.311 | 115 | Medium |
| Farallon virus              | 0.175 | 0.088 | 0.312 | 116 | Medium |
| Oz virus                    | 0.174 | 0.089 | 0.283 | 117 | Low    |
| Nairobi sheep disease virus | 0.173 | 0.091 | 0.324 | 118 | Medium |
| Keterah virus               | 0.169 | 0.089 | 0.314 | 119 | Medium |
| Estero Real virus           | 0.167 | 0.087 | 0.315 | 120 | Medium |
| Geran virus                 | 0.165 | 0.082 | 0.282 | 121 | Low    |
| Bole tick virus 4           | 0.164 | 0.081 | 0.315 | 122 | Medium |
| Caspiy virus                | 0.164 | 0.081 | 0.281 | 123 | Low    |
| Burana virus                | 0.163 | 0.080 | 0.279 | 124 | Low    |
| Artashat virus              | 0.162 | 0.085 | 0.278 | 125 | Low    |
| Hughes virus                | 0.161 | 0.085 | 0.267 | 126 | Low    |
| Tacheng tick virus 4        | 0.158 | 0.071 | 0.257 | 127 | Low    |
| St Croix River virus        | 0.153 | 0.076 | 0.264 | 128 | Low    |
| Bandia virus                | 0.148 | 0.077 | 0.245 | 129 | Low    |
| Chenuda virus               | 0.146 | 0.079 | 0.226 | 130 | Low    |
| Kolente virus               | 0.142 | 0.072 | 0.241 | 131 | Low    |
| Yongjia tick virus 2        | 0.132 | 0.057 | 0.219 | 132 | Low    |
| Bole tick virus 3           | 0.131 | 0.051 | 0.231 | 133 | Low    |
| Avian-like circovirus       | 0.126 | 0.056 | 0.216 | 134 | Low    |
| Fennes virus                | 0.077 | 0.025 | 0.157 | 135 | Low    |

---

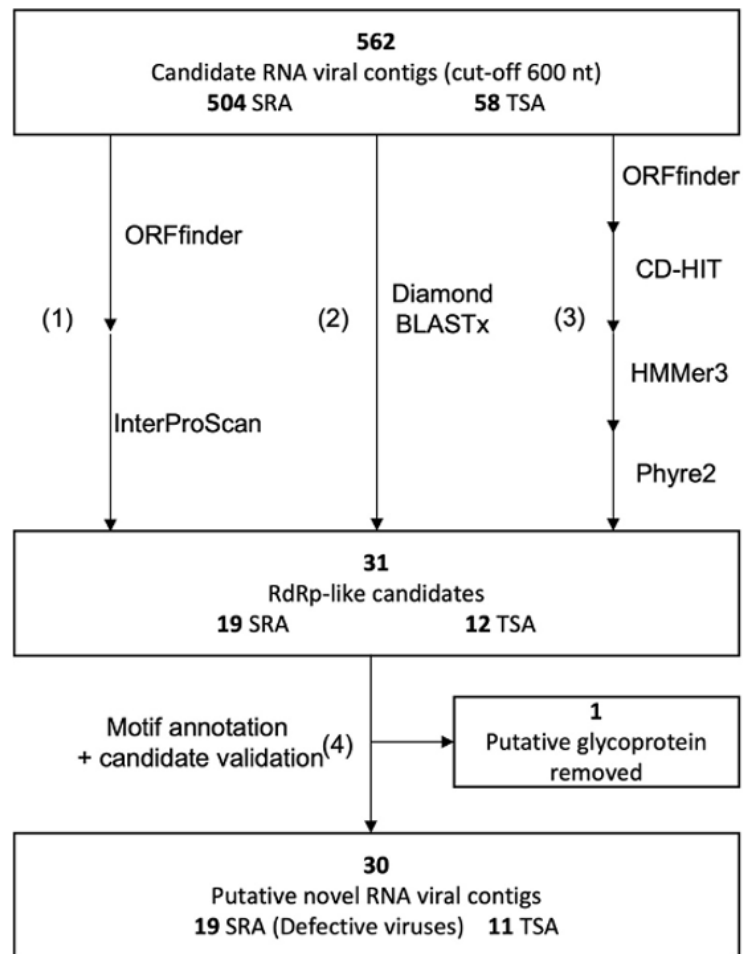

**Appendix Figure 1.** Workflow of detecting viral RNA-dependent RNA polymerase sequences. (1) ORFs were translated using ORFfinder (cut-off 200 aa). The translated sequences were predicted using the InterProScan-5.55-88.0 (--minsize 600; -goterms). (2) BLASTx using Diamond v2.0.14.152 against both non-redundant protein database and RdRp-scan database (-e 1e-5 --min-orf 600 --very-sensitive). (3) ORFs were translated using ORFfinder (cut-off 200 aa). Redundant sequences were then removed using CD-HIT v4.6.8 at 90% level of identity (-c 0.98 sequence identity threshold). Remaining sequences were scanned using HMMer3 v3.2.1 against RdRp HMM profile database (full sequence e-value 1e-06). HMM-RdRp hits were compared against PDB using Phyre2 server. In total, 31 RdRp-like candidates from SRA and TSA databases were found using RdRp-scan and InterProScan after removing duplicates. (4) RdRp motifs were mapped to candidate sequences using Geneious v2022.1. RdRp-scan database, RdRp HMM profile database, RdRp motifs database and RdRp key word lists were obtained from Charon et al. (77) (<https://github.com/JustineCharon/RdRp-scan>).

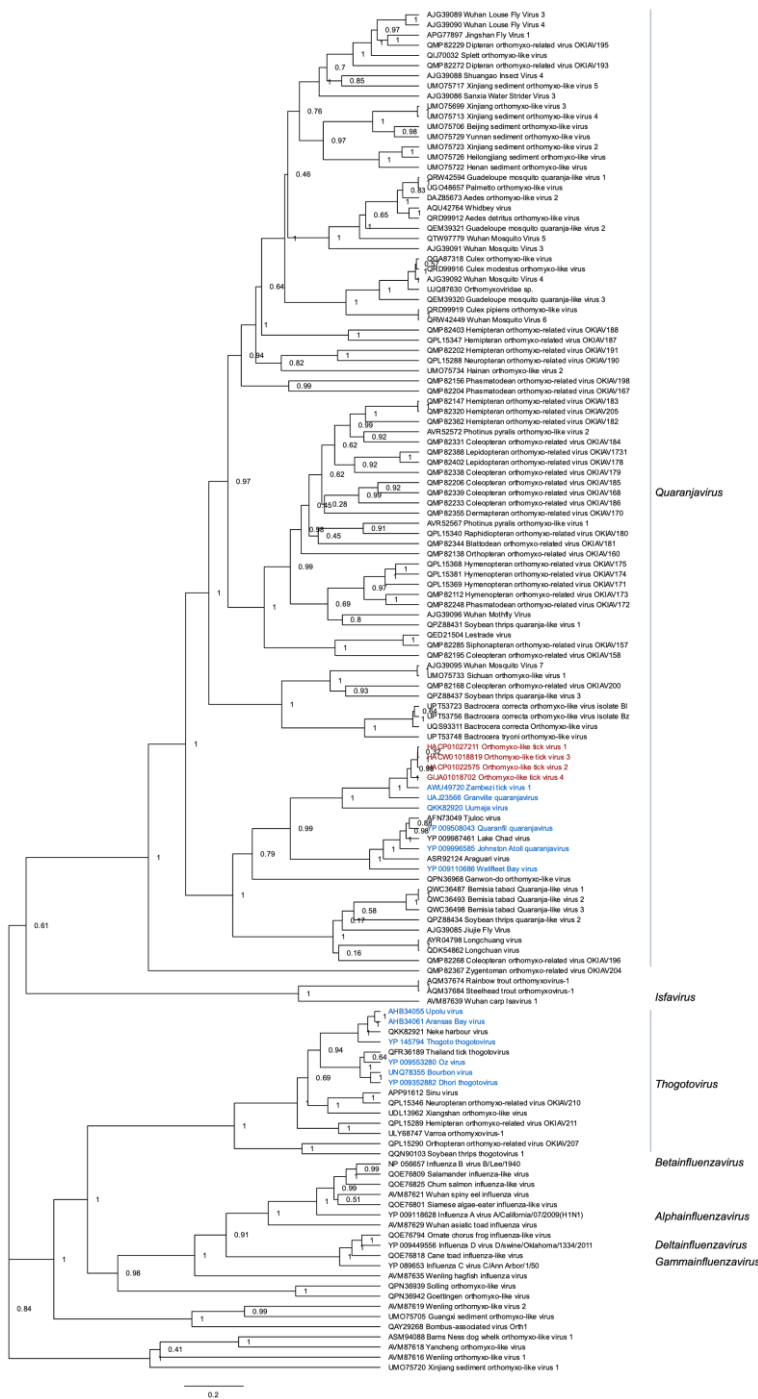

**Appendix Figure 2.** Phylogenetic relationship of the novel Orthomyxo-like viral contigs. Maximum clade credibility tree was inferred from the Bayesian posterior sample. Putative novel viral contigs found in the present study are shown in red, and previously known tick-borne viruses are shown in blue.





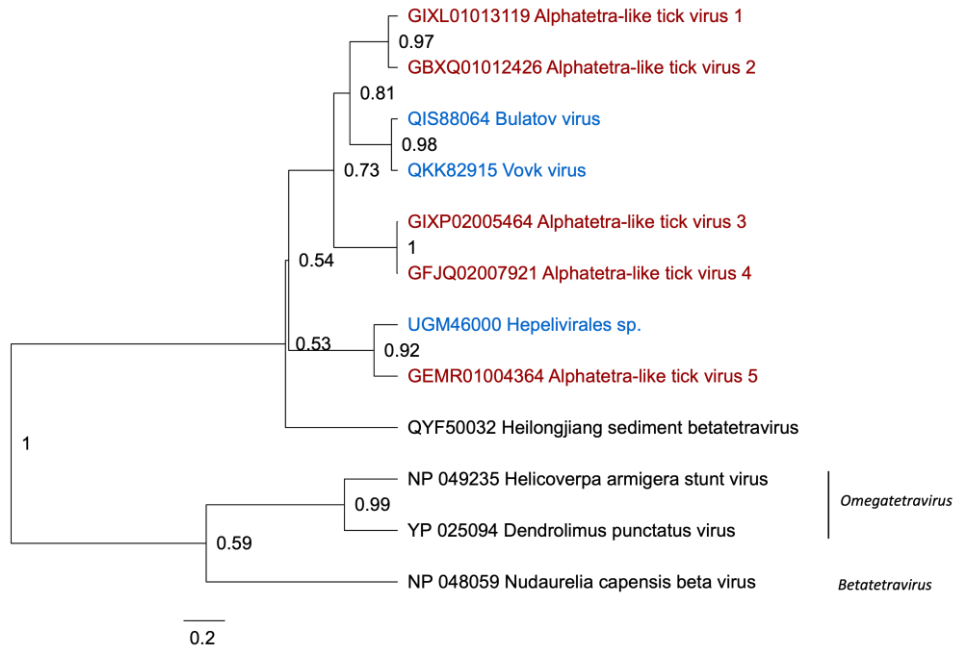

**Appendix Figure 3.** Phylogenetic relationship of the novel Alphetetra-like viral contigs. Maximum clade credibility tree was inferred from the Bayesian posterior sample. Putative novel viral contigs found in the present study are shown in red, and previously known tick-borne viruses are shown in blue.

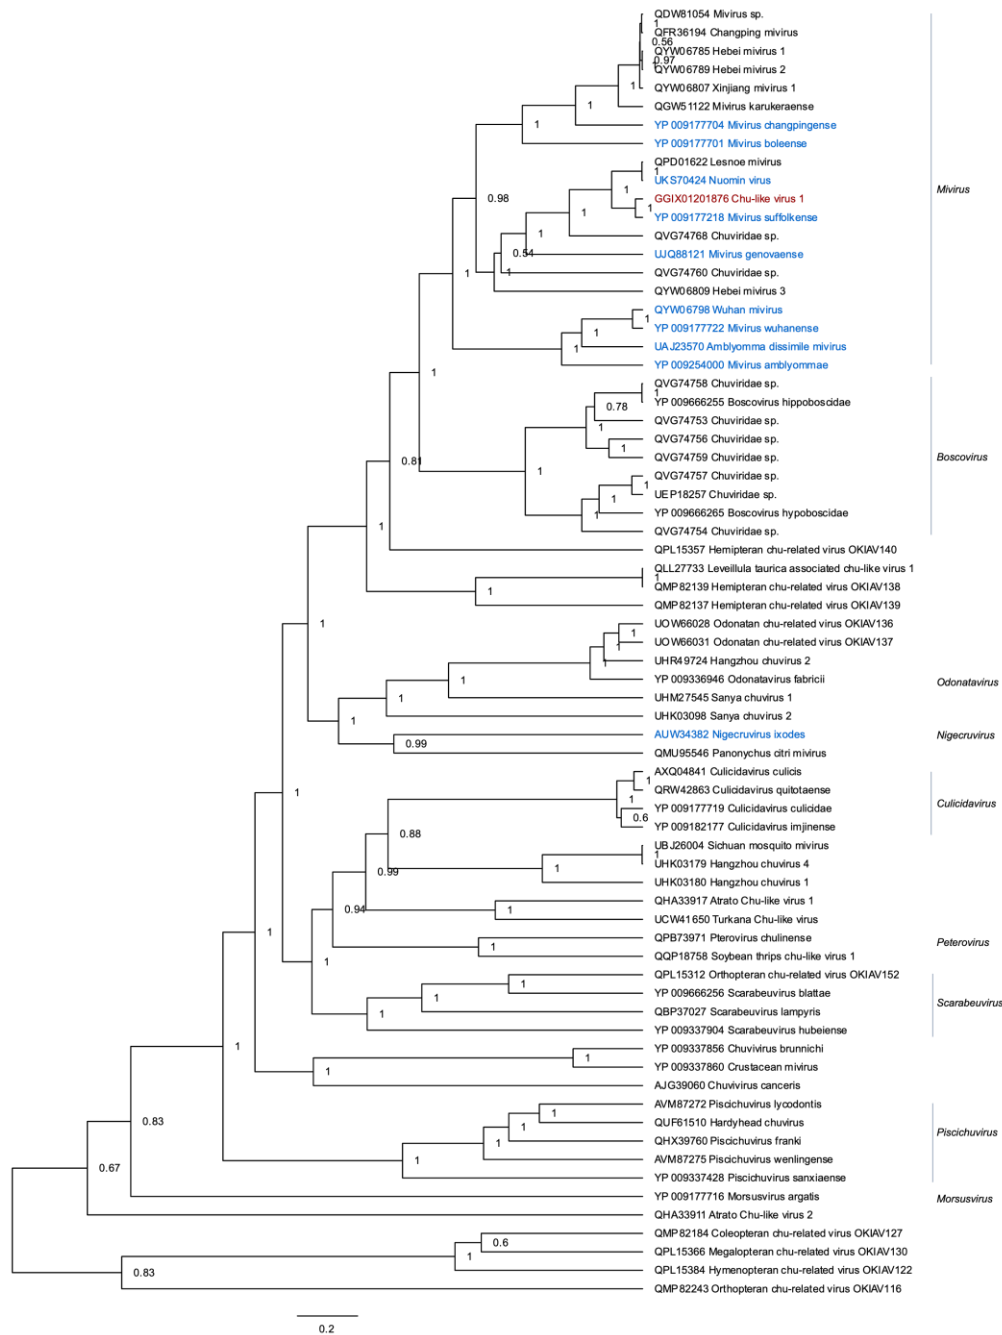

**Appendix Figure S4.** Phylogenetic relationship of the novel Chu-like viral contigs. Maximum clade credibility tree was inferred from the Bayesian posterior sample. Putative novel viral contigs found in the present study are shown in red, and previously known tick-borne viruses are shown in blue.
